# Supplementary material for: Insight Into the Molecular Mechanisms for Microcystin Biodegradation in Lake Erie and Lake Taihu
Source: Front Microbiol. 2019 Dec 10;10:2741. doi: 10.3389/fmicb.2019.02741 (PMC6914704; doi:10.3389/fmicb.2019.02741)
Supplement: Supplementary file 2 [file Data_Sheet_1.xlsx]

## Sheet: mlrA contigs
Query	Study site and year	Lowest E-value	Greatest identity %	Greatest positive %	Nucleotide sequence
HAA9FADXX_s1_1_GSLv3-7_07_SL75765_(paired)_contig_48855	Lake Erie 2014	1.118e-06	36.538	55.769	GTTGATGGTTAAACGTCATAGCAGAAGCAGAAGATGGTATAGAATACAATGATGAATTAGGATTCTGCTGATGTATGTTCAATGGCGTTCGCTCGCTTTGAAAACTTAGATTGTTCATCATTGATTGGTTGACCTGATCACCCATATAAGAGTTGTTTAGATTGGTGGTGCCCATAAGATTATTTAACGAGAATGAAGGCGGCATATGCTGGTTTTGATTTGAAACTGAGCTCTGTGTAGATAGTGGAGGTTGTGAATGAGGACCTTGCTGAGGCTGGTACATTAAGTTCTGCATTGGATTGTGGATAAGACCTTGCTGTTTGTTCAGATCATATATCTTCTTGAGCAGATTCTTGAATTCTTCAAAATCTTCGTCCTGTTTTACAAATGCCTCACGAA…
Diel5S_2200h_metaT_9422.2.132645.CGTACG.anqtp.hR_trimmed_contig_203530	Lake Erie Diel 2014	1.626e-06	40.541	70.27	TGTAGTGTAGTGTAGTGTAGTGTAAGTGTAAGTGTAGTGTAGTATAATGTAAGTGAGTGTGTAGTGTGTAGTGTAGTGTTTTACCCTCCAAAGTTAGTGAAGAACTTGGGTAGGGAATCGACTATGACGTGTGGCTCGGTGAAGAACATGGGCATGTGCCATAATCCCCACAAGACGCCAACAAGAATCGATGCAAGATTAATGTCTCCTGTCGCTATGTAAGCCCGAGGGAGGAGGTAGCCTCTCCATCCAACTTCCTCGAGGAAGATCGTGAAAAGACTCAAAATTGTCCCGCCGAGGAATGGCAACCATGCGAAATTAATTGCGGGCATGCTGTGGAAAAATCTACCGATGGGAACGCTCAGAGCCACCATCAGCACAGGTAAGGTAAATGCTATC…
Diel4S_1600h_metaT_9422.1.132642.GTTTCG.anqtp.hR_trimmed_contig_385031	Lake Erie Diel 2014	1.221e-06	35.556	48.889	CTCACAATGTCACCCGTGGAAAGACCCAAGAAAATGTCGGCGCCCTTCATGATCTCACCCAGGGTGCGTGCAGATGTTTTTTGGGCATAAAGGGCTTTGGACGCATCCATATTTTCACGCCCCTCGTAGCACACCTTTAGCGTCGGCGGCAAAAATATTCTCGCGCCTAAGGCCGAGTTCTTCTAAAAGCTCAATACAGGCAATCCCAGCCGCCCCTGCCCCAGACACCGCAAGTTTGACTTTGGTGATGTCTTTCTTAATCAGATGCAGCCCATTTAAAATTGCGGCGGCAACAATGATGGCCGTTCCATGCTGATCGTCATG
Diel4S_1600h_metaT_9422.1.132642.GTTTCG.anqtp.hR_trimmed_contig_329243	Lake Erie Diel 2014	1.493e-06	40.541	70.27	CCAACAAAAGCAAACACAAATTACGAACATGACGGTTACAGTGAAACCTGAATTAGATCCACAACAAGCATTGCAAGAAGTCATTTGGGGCTTTCTACTGACTATCGCCATTTCCTGGGGACCCTGGCTTTACCATGTCTATATCGTCCAAGTAAAAAACCAGCCATTCAATCCCGGCCTTCATCTTGTTTGTGGCTTAGGTCCAATCTCTTCGGCGGCCATCATGACATACTTAGCTTCTGAGCATCAAACAGTAGGCGAGCTAATGGGTCAAATAATTAGCTTCCCAGAGGGTGTGTGGTACTGGTTTGCGATAGGGTTTACCTTACCTGTGCTGATGGTGGCTCTGAGCGTTCCCATCGGTAGATTTTTCCACAGCATGCCCGCAATTAATTTTGC…
Diel2S_0400h_metaT_9179.2.124619.CTTGTA.anqtp.hR_trimmed_contig_323127	Lake Erie Diel 2014	6.62e-06	47.368	53.03	GAACCTTTGCGCATGGACGACTGCGAACTATTCTCGCAACGGCGGATCCATCACCATCACCGTCCAGACCACTGGATCATTCCCTGGGATGCTCACACATCGCGAGATCTCCTTCCGGCTCCCGAATACCCCTCCGCCGTCCTCTGTCACTGTCAACGGCAAGTCCATCGGCGTCGCTCCTGAGGGAGGTGTTGGGTGGTATTACGACGGAAGACACGTCACCACTGAAATTCGCGCGGGCGTTTTTCCAGTTTTGTCGACTCTCACTGTCGTCGTGACGT
Diel1s_2200h_metaT_9422.1.132642.GTGGCC.anqtp.hR_trimmed_contig_522607	Lake Erie Diel 2014	1.274e-08	45.946	70.27	GAAAGGACGATGTTTTTAAGATTTTGCAACTTCTTCTTTTGGCTTCATTAAATGATTTGAAGGGAGATGGTGCCGACTATAACAGGAATGGCGGCTATGCTGAGCCAGAGGAAGAATTTGCCCAGCTTGTCGATGTTGAGGCCCGCTACACTTCCATTCAGGGCCGCATGAAACGCAAAGGCAGGTACCAACGTCGAAGGCAAAGCGAACCAAATTCGACCCATAGGTATCGACAATAACGTCAACGCAGTCACATACCCTCCATAGTTAGTGAAGAACTTTGGTACGGAATCGACAATAACATGGGGTTCAGTAAAGAACATCGGCATGTGCCATAGTCCCCACATGACCCCAACAACAATTGATGCGATATTGATGTCTCCGAAGGCTATGTATGCA…
Diel1s_2200h_metaT_9422.1.132642.GTGGCC.anqtp.hR_trimmed_contig_37069	Lake Erie Diel 2014	2.21e-06	40.541	70.27	AAATACTTTAATAAAAATACAAAAAGGTTAAATATAAACAGTTACATAAAAATAATAACAAAGAATAAAAGAAATAATATTATTTATATCTTTTTGTTTTTATGTCCCTTAGATGAGGCGAAGGAGGAGGGCGCTGGGGATGACAATGACAGCAGCCATACTTAGCCATATAAAGTATTTGCCCAGCCTGTCTATGCTGAGACCCGCCACGCTGCCATTCAAGGCAGAATGGAAGGCAAATGTAGGTACCAACGTAGAAGGCAAAGCCAGCCAAATTCGACCCATAGGGATAGACAATAACGTCAAAGCAGTTACATACCCTCCAAAGTTAGTGAAGAACTTGGGTAGGGAATCGACTATGACGTGTGGCTCGGTGAAGAACATGGGCATGTGCCATAA…
C3GUCACXX_s1_1_GSLv2-7_58_SL48087_(paired)_contig_11075	Lake Taihu 2013	3.31e-14	55.17	65.52	CAGAACCTCAGGCGGTCGAACAGCTCACCGAGCCCCTTGCGACCCCAGCCGATGGCGACGATGACCAGCGCCGCCGCAGTCGGCGCGAAAGGAAACAGGTAGCCGGTCCAGAGGATCGGATTCTCGATCACCCTGGGGAAGACGCTGATGATGTTCGGATGCCAGGGCGCGGTCCGCATGTCCTTGAACACGGCCGCCATGGCGCCGGGGTCGAGCAGGCGGACTGCGGTGACGACCGCGCCGAGCACGAAGGCCAGCACGTAGAACGTCA
T09_4_trimmed_(paired)_contig_93827	Lake Taihu 2014	8.77e-06	39.13	54.35	CTTCCGATCTCAGAAATGGCGGTGCCTAACACTGCCCCAGTATCCGTATGTAACCCGGAGGGAATATCAATACTGAGAAACGGTTTGCCCCAGGTATTCACAAGGGCGATCGCTGTGGCTACGGGGTCTTTAATTGCCCGTTCCAAACCAAACCCAAACAAGCCATCCACAAATAAAGCACAATTTTGGAGAAAGTCAATTTCTTGATAAATAGGTATGCCCAAACTCGCCGCATAATTTGCATGATGCTGGGTTAACTCCTTCAGCTTGGTAAACGGGCAATAAATGATGACTTCATAGCCCCG
T07_9_trimmed_(paired)_contig_239783	Lake Taihu 2014	9.46e-06	28.57	48.21	AGCAGCGCTTCGGGGATGGCGCCGCAATTGACGGCGACGAAAGGTTTGGCCACGCGGGTGCTGGCGCGGTGGATGGCGCGCGCCAGCAGTTCCTTGCCGGTGCCCGTTTCGCCCTTGATCAGCACCGGGATGTCGCGGTCCACCTGCTTCACCTTCTCGAGCAGCCCGAGCAGTTCCTGGTCCGTGACAGATCGGAAGAGCGGTTCAGCAGGAATGCCGAGA

## Sheet: mlrB contigs
Query	Sample site and year	Lowest E-value	Greatest identity %	Greatest positive %	Nucleotide sequences (trimmed)
>C3GUCACXX_GSLv2-7_49_SL48078_(paired)_contig_22003_trimmed	Taihu 2013	3.18e-09	24.85	42.01	ACCGATTTGACTCCAAATTTTTTCCGAGAGAACTTCCGTCAGTGGTTGCCCCGTGACTCTAGCAATTAACCAACCAAGAACATCAGTATTAATAGTTTTATAGCCAAAACTCTGACCGTGTTCTCCTTTTTTTTGGACAGTTTGCAGGAATTGAAAATAAGTGCTAGGGCCCGTATAACCTTCTGGTTTCGGTAAAGGATTCCCGGCGGCCGCGTGTTGCCAGACCCCTGCCTTGGGATCGGCATAATCTTCACTATAATCTAGGGCCGTGGTCATATCGAGAACTTGACGCACCGTGGCATCGCCAAAGGCACTTTTCGTCAATTCCGGAATATAATCCCTAACCAGTTTATTTTCCTCTAATTTATTTTCGGCCACTAACATTTCTCCCAATAATCC…
>C3GUCACXX_GSLv2-7_49_SL48078_(paired)_contig_3682_trimmed	Taihu 2013	4.88e-25	27.08	44.1	CAAAAAGCGGATGCCATCGTCAATGACTTCATGCAGAAAAACAAGATTCCTGGACTTGTTCTGGGGGTCGTTAAAAATGGAAAAATTGTCGTTGAAAAAGGTTGCGGGGTAATATCTCTTGATTCAGGGATGATCCCTAATGAAAACACTATTTTTAATATCGGTTCAGTTTCAAAACCTCTCACAGCTTTCGGCATCATGTATCTCGTCGATCAGGGGAAGCTAAGACTTGATGATGTCGCCAGTCAATACATCCCGAATCTGCCACCAAGCTGGCGGAAAACTACCATTCGGCAGTTCATGTCTCATCAGAGCGGCATACCCCAGTTTAAGCGTAATCTGCCAACATTTAACGAGATGCTCGCCAGCTCCAACAATCTTCCTTTAACCTTTGCACCG…
>C3GUCACXX_GSLv2-7_50_SL48079_(paired)_contig_11278_trimmed	Taihu 2013	2.42e-09	24.73	40.32	CGGCTCGAAAATATTTCTTTTCAGATAATCCTGGTACTTCAAGCCACTTAACTTTTCGATCATATAAGTTGCAAGAATAAAGCTAGGATTTGAATAGGAGAAGTTGGTCCCCGGAGTGAATATTAGAGGATTGTTGATGAATAGTCCTACGTAAACTCCTACAGTGCCCAAAAATTCCCCAGTATAGACTTCATAATCCTTTAGATCATTACCTATACCCGAAGACATGGAGAGCAGTTGCTCGTATGTTACATCAATGCATGTTCCGTTTGGCATGTCTTGAACTTGAGGACACCACGAAGTTTGGTTAGGAAATCCAAACTTGACAAAATCATCTTGTGTAAGGTCATCGTTAATAGGCTGTGATAAGTTAACTTTGCCCTGCTCTTGGAGCTGATA…
>C3GUCACXX_GSLv2-7_50_SL48079_(paired)_contig_15451_trimmed	Taihu 2013	2.08e-23	26.39	43.4	CAAAAAGCGGATGCCATCGTCAATGACTTCATGCAGAAAAACAAGATTCCTGGACTTGTTCTGGGGGTCGTTAAAAATGGAAAAATTGTCGTTGAAAAAGGTTGCGGGGTAATATCTCTTGATTCAGGGATGATCCCTAATGAAAACACTATTTTTAATATCGGTTCAGTTTCAAAACCTCTCACAGCTTTCGGCATCATGTATCTCGTCGATCAGGGGAAGCTAAGACTTGATGATGTCGCCAGTCAATACATCCCGAATCTGCCACCAAGCTGGCGGAAAACTACCATTCGGCAGTTCATGTCTCATCAGAGCGGCATACCCCAGTTTAAGCGTAATCTGCCAACATTTAACGAGATGCTCGCCAGCTCCAACAATCTTCCTTTAACCTTTGCACCG…
>C3GUCACXX_GSLv2-7_50_SL48079_(paired)_contig_23418_trimmed	Taihu 2013	3.18e-09	24.85	42.01	GTGATGCACCATGGTCAAATGGTTTATGAAAAGTTTTTCGGCTGTTTGAACCAGGTGGAACGTCATGGGGCCATGTCCCTAACTAAATCCTTTGTGGGATTATTGGGAGAAATGTTAGTGGCCGAAAATAAATTAGAGGAAAATAAACTGGTTAGGGATTATATTCCGGAATTGACGAAAAGTGCCTTTGGCGATGCCACGGTGCGTCAAGTTCTCGATATGACCACTGCCCTAGATTATAGTGAAGATTATGCCGATCCCAAGGCGGGGGTCTGGCAACACGCGGCCGCCGGGAATCCTTTACCGAAACCAGAAGGTTATACGGGCCCTAGCACTTATTTTCAATTCCTGCAAACTGTCCAAAAAAAAGGAGAACACGGTCAGAGTTTTGGCTATAAA…
>C3GUCACXX_GSLv2-7_51_SL48080_(paired)_contig_11705_trimmed	Taihu 2013	2.28e-09	23.81	40.21	GTTGTAGTTGATGGTGAGCCCAGGTTCCAGACAGCCATGGGGATTGTGAATGAGGAACATCAGGTACCCATGACTATGGATGCTGTATTCCCCATTGGGAGCAACACCAAACTTTTCACTGCTGTTGCATTATATCAGCTCCAAGAGCAGGGCAAAGTTAACTTATCACAGCCTATTAACGATGACCTTACACAAGATGATTTTGTCAAGTTTGGATTTCCTAACCAAACTTCGTGGTGTCCTCAAGTTCAAGACATGCCAAACGGAACATGCATTGATGTAACATACGAGCAACTGCTCTCCATGTCTTCGGGTATAGGTAATGATCTAAAGGATTATGAAGTCTATACTGGGGAATTTTTGGGCACTGTAGGAGTTTACGTAGGACTATTCATCAAC…
>C3GUCACXX_GSLv2-7_51_SL48080_(paired)_contig_13260_trimmed	Taihu 2013	2.74e-22	28.04	46.29	CAAAAAGCGGATGCCATCGTCAATGACTTCATGCAGAAAAACAAGATTCCTGGACTTGTTCTGGGGGTCGTTAAAAATGGAAAAATTGTCGTTGAAAAAGGTTGCGGGGTAATATCTCTTGATTCAGGGATGATCCCTAATGAAAACACTATTTTTAATATCGGTTCAGTTTCAAAACCTCTCACAGCTTTCGGCATCATGTATCTCGTCGATCAGGGGAAGCTAAGACTTGATGATGTCGCCAGTCAATACATCCCGAATCTGCCACCAAGCTGGCGGAAAACTACCATTCGGCAGTTCATGTCTCATCAGAGCGGCATACCCCAGTTTAAGCGTAATCTGCCAACATTTAACGAGATGCTCGCCAGCTCCAACAATCTTCCTTTAACCTTTGCACCG…
>C3GUCACXX_GSLv2-7_51_SL48080_(paired)_contig_4268_trimmed	Taihu 2013	5.1e-09	24.85	42.01	ACCGATTTGACTCCAAATTTTTTCCGAGAGAACTTCCGTCAGTGGTTGCCCCGTGACTCTAGCAATTAACCAACCAAGAACATCAGTATTAATAGTTTTATAGCCAAAACTCTGACCGTGTTCTCCTTTTTTTTGGACAGTTTGCAGGAATTGAAAATAAGTGCTAGGGCCCGTATAACCTTCTGGTTTCGGTAAAGGATTCCCGGCGGCCGCGTGTTGCCAGACCCCTGCCTTGGGATCGGCATAATCTTCACTATAATCTAGGGCAGTGGTCATATCGAGAACTTGACGCACCGTGGCATCGCCAAAGCCGCTTTTCGTCAGTTCGGGAATATAATCCCTAACCAGTTTATTTTCTTCTAATTTATTTTCGGCCACTAACATTTCTCCCAATAATCC…
>C3GUCACXX_GSLv2-7_53_SL48082_(paired)_contig_69080_trimmed	Taihu 2013	1.39e-09	26.92	42.31	ATTAACAGAAAAGAAGACTCCAATATCCAACATTGGAATCAAAAAACATACGCTATGAAAGTAGATGGTATCACCACCATGGCCAATTACATATTGACCATTGGTACTCATGTGTATAAACCCATGGGCCATCCCATTAATCCGTTTATCTTTAGTAAATAGGGTAGAATGCATTTTTTTCAATGTAGATGGTTTTAGTAGAACGCTGTCTTGAGAAAGATGGGCTTGTAAGAACTTAGCCATATCTGCAGCAGTACTTGAAAGTCCACCTGCAGGCACACCCTGCACAATTTCAAATTCACGCGGATTGGTAGCATTCCCATCAAATGCATATCCTACCGACATGTGCTTCTCAAATTCAATCGGTAGCACTTGACTGAAAGTAGAACTCTTCATACC…
>C3GUCACXX_GSLv2-7_60_SL48089_(paired)_contig_13605_trimmed	Taihu 2013	1.25e-09	24.34	40.21	GTTGTAGTTGATGGTGAGCCCAGGTTCCAGACAGCCATGGGGATTGTGAATGAGGAACATCAGGTACCCATGACTATGGATGCTGTATTCCCCATTGGGAGCAACACCAAACTTTTCACTGCTGTTGCATTATATCAGCTCCAAGAGCAGGGCAAAGTTAACTTATCACAGCCTATTAACGATGACCTTACACAAGATGATTTTGTCAAGTTTGGATTTCCTAACCAAACTTCGTGGTGTCCTCAAGTTCAAGACATGCCAAACGGAACATGCATTGATGTAACATACGAACAACTGCTCTCCATGTCTTCGGGTATAGGTAATGATCTAAAGGATTATGAAGTCTATACTGGGGAATATTTGGGCACTGTAGGAGTTTACGTTGGACTATTCATCAAC…
>C3GUCACXX_GSLv2-7_60_SL48089_(paired)_contig_23795_trimmed	Taihu 2013	4.86e-17	37.37	51.52	GAAGTTGCAGACAAGTTGTGTGAACAGGTCAAGAATGAATCTGGAACTCCTGGATTAGTGGTCAGTGTGAGTATTGATGGTATCCCTGTTTACCAGAGAGGATTTGGTTATGCTGATGTTGAGAATCATATTCCATGCCAAAGCAATACTGTAATGCGAATAGCTAGTATTAGCAAGTCTATGACTACGGCTGTGGTTGCAAAGTTATGGCAAGAAGGGAACCTTTCCTTTGATAAACCTGTTCAAGATTATGTACCGGAATTCCCAGAAAAATATTTTGATGGTGAAAAGGTAGAAATCACTTTAAGACATTTATTGAGTCACCTGTCTGGTATTCGTCATTAC
>C3GUCACXX_GSLv2-7_60_SL48089_(paired)_contig_40995_trimmed	Taihu 2013	1.29e-05	28.97	44.19	CCCGGCGTGAAGTACCTTTATACAACTCACGGATGGACATTGGTGAGTGCAGTCGTCGAGAGCGCCACAAAGAAATCTTTTCCCGCTTCCATGAAAGACTTCTTTTACGAAATGGGATTGAGGAATACATACTTGGACGAGAACAAGCCCATCATCTACAACCGTGCAAAGTATTACATAAGAAACGAGAAGGGGCGATTAGAGAATGCTCCGCAAGTCGACAATTCATATAAATGGGCGGGAGGAGGATTCTTGTCTACAAGCGACGATTTGGTAAAGTTCGGAAACGCAATGTTATACGCG
>C3GUCACXX_GSLv2-7_60_SL48089_(paired)_contig_4543_trimmed	Taihu 2013	4.03e-25	26.63	43.85	CAAAAAGCGGATGCCATCGTCAATGACTTCATGCAGAAAAACAAGATTCCTGGACTTGTTCTGGGGGTCGTTAAAAATGGAAAAATTGTCGTTGAAAAAGGTTGCGGGGTAATATCTCTTGATTCAGGGATGATCCCTAATGAAAACACTATTTTTAATATCGGTTCAGTTTCAAAACCTCTCACAGCTTTCGGCATCATGTATCTCGTCGATCAGGGGAAGCTAAGACTTGATGATGTCGCCAGTCAATACATCCCGAATCTGCCACCAAGCTGGCGGAAAACTACCATTCGGCAGTTCATGTCTCATCAGAGCGGCATACCCCAGTTTAAGCGTAATCTGCCAACATTTAACGAGATGCTCGCCAGCTCCAACAATCTTCCTTTAACCTTTGCACCG…
>C3GUCACXX_GSLv2-7_60_SL48089_(paired)_contig_5903_trimmed	Taihu 2013	3.18e-09	24.85	42.01	ACCGATTTGACTCCAAATTTTTTCCGAGAGAACTTCCGTCAGTGGTTGCCCCGTGACTCTAGCAATTAACCAACCAAGAACATCAGTATTAATAGTTTTATAGCCAAAACTCTGACCGTGTTCTCCTTTTTTTTGGACAGTTTGCAGGAATTGAAAATAAGTGCTAGGGCCCGTATAACCTTCTGGTTTCGGTAAAGGATTCCCGGCGGCCGCGTGTTGCCAGACCCCTGCCTTGGGATCGGCATAATCTTCACTATAATCTAGGGCAGTGGTCATATCGAGAACTTGACGCACCGTGGCATCGCCAAAGGCACTTTTCGTCAATTCCGGAATATAATCCCTAACCAGTTTATTTTCCTCTAATTTATTTTCGGCCACTAACATTTCTCCCAATAATCC…
>C3GUCACXX_GSLv2-7_61_SL48090_(paired)_contig_2151_trimmed	Taihu 2013	3.18e-09	24.85	42.01	GTGATGCACCATGGTCAAATGGTTTATGAAAAGTTTTTCGGCTGTTTGAACCAGGTGGAACGTCATGGGGCCATGTCCCTAACTAAATCCTTTGTGGGATTATTGGGAGAAATGTTAGTGGCCGAAAATAAATTAGAGGAAAATAAACTGGTTAGGGATTATATTCCGGAATTGACGAAAAGTGCCTTTGGCGATGCCACGGTGCGTCAAGTTCTCGATATGACCACTGCCCTAGATTATAGTGAAGATTATGCCGATCCCAAGGCAGGGGTCTGGCAACACGCGGCCGCCGGGAATCCTTTACCGAAACCAGAAGGTTATACGGGCCCTAGCACTTATTTTCAATTCCTGCAAACTGTCCAAAAAAAAGGAGAACACGGTCAGAGTTTTGGCTATAAA…
>C3GUCACXX_GSLv2-7_61_SL48090_(paired)_contig_4083_trimmed	Taihu 2013	2.08e-23	26.39	43.4	ATTGTAAAGAAAGATTACGGCATGATCCCGATCGGGGACAAATAAAAACGTACTTCTGTACCCTTTTGCCGAGCCATTTTTTGAAACAACTTCCACTCCCCCCAAATAGTTAATCATCCAGCCTGGAGAGCCAGGAAGGTTCGGTTGGGTAGGCTCCAACATCTGGCGGTAACTGGCAGGACTGAGGAGTTTATTCTTGCGGATGGCATTGTAGAATTTGAGCAGGTCACCAAGAGTTGACTGCATGAATCCTGAAGGGATGTTGTAAAGTCCGCCAGGTGGCATTACTTGGTCAACGGGCAGTAATTGCCCATTTCTATCAGCATTTATGTATCCAGTCGCTGTATTGGCATCTCTAAGTCCAAATCCTGTGCGGGTCATACCCAGCGGCAAGAATAT…
>C3GUCACXX_GSLv2-7_61_SL48090_(paired)_contig_55259_trimmed	Taihu 2013	6.52e-17	37.37	51.52	GAAGTTGCAGACAAGTTGTGTGAACAGGTCAAGAATGAATCTGGAACTCCTGGATTAGTGGTCAGTGTGAGTATTGATGGTATCCCTGTTTACCAGAGAGGATTTGGTTATGCTGATGTTGAGAATCATATTCCATGCCAAAGCAATACTGTAATGCGAATAGCTAGTATTAGCAAGTCTATGACTATGGCTGTGGTTGCAAAGTTATGGCAAGAAGGGAACCTTTCCTTTGATAAACCTGTTCAAGATTATGTACCGGAATTCCCAGAAAAATATTTTGATGGTGAAAAGGTAGAAATTACTTTAAGACATTTATTGAGTCACCTGTCTGGTATTCGTCATTAC
>C3GUCACXX_s1_1_GSLv2-7_55_SL48084_(paired)_contig_13130_trimmed	Lake Erie	3.89e-10	27.42	39.52	CCGACCACGCGCCTGCCGATCGCGTCGGCCAGCAAGTGGGTGTCCGCGGTGGCGATCGCGAGCCTGGTCGATTCGGGGCTTCTCGGCTGGGACACGCCGGTCGGCGCCCTGATGCCCGATGCGCCGGTCGACAAGCACGCGATCACCCTGCGCCAGCTGTTCTCGCACACCTCGGGAATCGGCGGTGGCGAGGGCGCGTGCCTCAATGATCCGGACACCACGCTCGCGGCGTGCGCGATGCAGATCCTGGGCTCGCCGCTGGCGTGGGCGCCCGGCACCTGTTTCGCCTACGGCGGCAGTTCGATGCAGGTTGCCGGGCGCATGGCGGAAATCGCGAGCGGGCTGAGCTGGGACCAGCTCTTCATCGCGCGCGTCGTCACTCCGCTCGGGCTGGTCGCC…
>C3GUCACXX_s1_1_GSLv2-7_55_SL48084_(paired)_contig_416_trimmed	Lake Erie	2.59e-09	31.58	42.76	GGTGGAATCCCAGCCGAGCGGCACGCGCAGTGCGGCGTCGAAGATCTGCTGCCAGGACTTTCCTGTTGCCACCTCCGCCATGCGACCGGCCACGCGCAGATGGGTGGCGCCGTACCAGTAACGCGCCTTCGGCGGCGCCAGCACACCCGGTTTGCTCTGGCTGTCATGAATCCGCAGCACCGCCTCGGCCAGCGTGATGCTGGTCGCGGTGGCTTCGTCCACGTCGCCCTCCAGGCCGCTGGTGAACGACAGCAGGTCAGAAAGCGTGATTTGGCCTATCGGCCCGCTCCACGGTGCGCCGTTGCGGTCGACCAGCAGATCGCCCGTGCGGGTCGCCAGCGTCAGGGTGCCTTGCTGCACTAGCCGCAGGATGGTCGATCCGGTGACCCATTTGGTGGC…
>C3GUCACXX_s1_1_GSLv2-7_55_SL48084_(paired)_contig_5371_trimmed	Lake Erie	8.14e-07	24.35	43.48	AGCAAATGGGTGTCGGCGCTGACCCTCGCCAGACTCGTCGAACGCGGGCAGATGCGCTGGAGCGACACCGTCGGCCAGTACTTCCCCACCGTGGAGCCGGCCAAGCGCGGCATCACCCTGGAACAGTTGTTCTCGCACACCAGCGGGTTGCCCGCCAGCGAGGATACGTGCTTGTCCAACCCGCTGTTCACCCTCGCCTCCTGCGCCAACCGGATCCTGCAGCAGCCGCTGATCGGCACGCCGGGCCAGGTGTTCGCCTACGGCGGCGCTTCGATGCAGGTCGCGGGGCGGATGGCGGAAATCGCCACCGGGCGCGCCTGGGACGACCTG
>C3GUCACXX_s1_1_GSLv2-7_57_SL48086_(paired)_contig_141_trimmed	Lake Erie	2.59e-09	31.58	42.76	ACGTCGCAGACGCGCAATCCCATCGCCTCGGCCACCAAATGGGTCACCGGATCGACCATCCTGCGGCTAGTGCAGCAAGGCACCCTGACGCTGGCGACCCGCACGGGCGATCTGCTGGTCGACCGCAACGGCGCACCGTGGAGCGGGCCGATAGGCCAAATCACGCTCTCTGACCTGCTGTCGTTCACCAGCGGCCTGGAGGGCGACGTGGACGAAGCCACCGCGACCAGCATCACGCTGGCCGAGGCGGTGCTGCGGATTCATGACAGCCAGAGCAAACCGGGTGTGCTGGCGCCGCCGAAGGCGCGTTACTGGTACGGCGCCACCCATCTGCGCGTGGCCGGTCGCATGGCGGAGGTGGCAACAGGAAAGTCCTGGCAGCAGATCTTCGACGCCGCA…
>C3GUCACXX_s1_1_GSLv2-7_57_SL48086_(paired)_contig_7525_trimmed	Lake Erie	5.91e-09	36.67	46.67	CCGACCACGCGCCTGCCGATCGCGTCGGCCAGCAAGTGGGTGTCCGCGGTGGCGATCGCGAGCCTGGTCGATTCGGGGCTTCTCGGCTGGGACACGCCGGTCGGCGCCCTGATGCCCGATGCGCCGGTCGACAAGCACGCGATCACCCTGCGCCAGCTGTTCTCGCACACCTCGGGAATCGGCGGTGGCGAGGGCGCGTGCCTCAATGATCCGGACACCACGCTCGCGGCGTGCGCGATGCAGATCCTGGGCTCGCCGCTGGCGTGGGCGCCCGGCACCTGTTTCGCCTACGGCGGCAGTTCGATGCAGGTTGCCGGGCGCATGGCGGAAATCGCGAGCGGGCTGAGCTGG
>C3GUCACXX_s1_1_GSLv2-7_57_SL48086_(paired)_contig_8262_trimmed	Lake Erie	8.59e-08	31.54	44.62	ACGCGCAACCCCATTGCGTCGGCCACGAAATGGATCACCGGCACCGTCATCCTGAGGCTCGTGCAACAAGGCGCTTTGAAGCTGAGCACCCGCACCGGCGAACTCTTGGTCGATCGCAGCGGCGCGCCATGGAGTGGACCGATCGGCCAGATCACCCTGGCCGACCTGCTGTCGTTCACCAGCGGTTTGGAGGGCGACGTCGACGAAGCCACCGTCGCCAACATCTCGCTGGCCGAGGCCGTGCTGCGCATCCATGACAGCCAAACCCGACCGGGCGTGCTGGCGCCACCCAAGGCGCGCTACTGGTACGGCGCCACCCACCTGCGTGTGGCCGGCCGCATGGCGGAAGTGGCAACCGGCAAGCCCTGGCAGCAGCTCTTCGATGCCGCGCTGCGTGCG…
>C3GUCACXX_s1_1_GSLv2-7_58_SL48087_(paired)_contig_11635_trimmed	Lake Erie	8.66e-07	30.15	41.18	GCCGAGCGGCACGCGCAGTGCGGCGTCGAAGATCTGCTGCCAGGACTTTCCTGTTGCCACCTCCGCCATGCGACCGGCCACGCGCAGATGGGTGGCGCCGTACCAGTAACGCGCCTTCGGCGGCGCCAGCACACCCGGTTTGCTCTGGCTGTCATGAATCCGCAGCACCGCCTCGGCCAGCGTGATGCTGGTCGCGGTGGCTTCGTCCACGTCGCCCTCCAGGCCGCTGGTGAACGACAGCAGGTCAGAAAGCGTGATTTGGCCTATCGGCCCGCTCCACGGTGCGCCGTTGCGGTCGACCAGCAGATCGCCCGTGCGGGTCGCCAGCGTCAGGGTGCCTTGCTGCACTAGCCGCAGGATGGTCGATCCGGTGACCCATTT
>C3GUCACXX_s1_1_GSLv2-7_59_SL48088_(paired)_contig_2370_trimmed	Lake Erie	2.59e-09	31.58	42.76	ACGTCGCAGACGCGCAATCCCATCGCCTCGGCCACCAAATGGGTCACCGGATCGACCATCCTGCGGCTAGTGCAGCAAGGCACCCTGACGCTGGCGACCCGCACGGGCGATCTGCTGGTCGACCGCAACGGCGCACCGTGGAGCGGGCCGATAGGCCAAATCACGCTTTCTGACCTGCTGTCGTTCACCAGCGGCCTGGAGGGCGACGTGGACGAAGCCACCGCGACCAGCATCACGCTGGCCGAGGCGGTGCTGCGGATTCATGACAGCCAGAGCAAACCGGGTGTGCTGGCGCCGCCGAAGGCGCGTTACTGGTACGGCGCCACCCATCTGCGCGTGGCCGGTCGCATGGCGGAGGTGGCAACAGGAAAGTCCTGGCAGCAGATCTTCGACGCCGCA…
>C3GUCACXX_s1_1_GSLv2-7_59_SL48088_(paired)_contig_3963_trimmed	Lake Erie	7.01e-08	28.97	43.48	TGGGAATTGGCCAGTGGCACCAAAAGCTTCTCTGGTGTCATGGCCGCAGCGCTCGTTCAAGACGGCTTACTTAAGCTTGAGGAAGTTTGCGCCGACACATTGCCCGAATTTTGGTCTGATCGGTATCGCAGCGCCATAAAAGTATCCGATCTTTTGCACCTGGTTAGTGGCATTGACGGGAAGGATGGACGTAATTTTGGCGATGTCCCAACCTATGCCGAAGCCGTGGCAGTTCCTTCAACCAAGGCCACCGGCACGCAGTTTTCCTATGGCCCCGTGCCATTTCAAGTCTTCGGGGAAATGGTGCGGCGTAAGTTAATCGCGGCCAAAACAGGTGATGCTGACCCCTTGGCCTACCTAACGCGGCGTATTTTCGCGCCTTTGGGCATCCGTCCGATA…
>Diel1s_2200h_metaT_9422.1.132642.GTGGCC.anqtp.hR_trimmed_contig_104908_trimmed	Lake Erie Diel 2014	2.48e-15	29.33	49.34	CTCGCCACTGACAATCTCGATCACCCGGCCAAGAAAGATGACACCAGGGTTAGAGTAACTGAACCGGCTCCCGGGCTTGAACTCAATCTCGGTGTAGGGCAGCATCGCGACGATCTGTGACCATTCACGCGGCTCGAATGGGTGCCAGGGCTTGTCTCCACCCCACGGCCAGGTCGGGTTCCGGAGCCCCGCGCTGTGCGACAGCAGATGCTTTAACCGCACTTCACCCATCGAACCATGTGGATTATGAATCCGGTTCAGTTCAGGCAGATACTTGATGATCGGATCGTCGAGCGAGATCTTTCCCTGATCACGCAATTGCATGATCGCGATGCCAGTCAGCGTTTTTGTGATCGATGCCCAGTGAAAGATGGTGTTCTCGGTAACGGCAGTTCCCTT…
>Diel1s_2200h_metaT_9422.1.132642.GTGGCC.anqtp.hR_trimmed_contig_109566_trimmed	Lake Erie Diel 2014	6.02e-11	30.37	46.67	CATTCCGAGCTTTTGCGACAGCTGTTGGTTGTAGTACTGCTGGAAGGTCCTGTTTGTGGCTTTCTCGATCATATCCTGCAGTAGCAGGTAACAGGCATTGTGGTAGTCCCAGATCGTTCCGGGTACGGCACGATATCGAAGGCACTCCGGCGTCTTGCAGTTGTCATTGCCGCGGTCGAATCCGATTCCCGTCGTCATCGTCAGGTGATGACGCACGGTGATTGCATCCTCTTGCTGTGGTGTACAGGATGACCAGCTCCTCCCGAGATAGGTGGCGCTGGTCTTGGAGATGTCCATCTGTTTTTGGTGCTGCGCGATACCGACCAGCGCGGCCGTCACGGTCTTCCCGGCAGAGGCCCAGTACCAGAGACTATCTTTTGTGAATGATCCGAAGTACTG…
>Diel1s_2200h_metaT_9422.1.132642.GTGGCC.anqtp.hR_trimmed_contig_117989_trimmed	Lake Erie Diel 2014	7.02e-08	25.52	45.52	CGTGCTGGCCATGCCGCTGGGGAGCAGAATCCGCTGGCTGAGCAACTGGGCGTAGGGCACACCGGAGGCCGCCTCGGCGACTCGTCCGGAGACGTGCATCGAGACGCCGCCATAGCAGAAGTCAGTACCCGGGAGAACGCTCACCAGTCCCTGGCCGGGAACGAAGACACGACGGAGTCCCACGCCGGCGATCTGCTGCACGGCCTGCGCCAGGCTGAGCGTGTCGCTGCTGATCGCGGGGTTGTTGGCGGGCAGACCGGAGGTATGCGACACGCACTGGCGCACGGTGATCTGGGCTAGGTTGCCGCTGCGGAATTCGGGGATGAATGCGCCAACGGTGCTGTCGAGCGTCAGCAGGCCGTCGTCCTGCAGGGCCAGCAGCAGGGCCGATGTCGGGGT…
>Diel1s_2200h_metaT_9422.1.132642.GTGGCC.anqtp.hR_trimmed_contig_12196_trimmed	Lake Erie Diel 2014	1.39e-09	27.38	48.81	GAGACCAGACAAATCGGTCAGCACAGATTTGATGCTGATGTCGTCACCTGTGAAGGGGTTGACGATGTTCAAGCCAGGCAACAAATTCTTCAGGGCTTGTTCCAAACGAAGCTGTCCCTTATCCCTTTGCTGGTAGGTCAATATGGCGGTGAAAAGACGAGTCAAACCACCGATACGGAAGAGGGTCTTGGAGGTGACGGGGTTGTTATTAACTCCAGTACTTCCAAAGGTGCCGTTGTAAATCACTCTTTGGTTGTAGGCAATACCGATGGCTACTCCAGGGATGCTCAAGTCGGACCTGAGGCGAGTCCAGGTGCGTTCCAAAGTCCT
>Diel1s_2200h_metaT_9422.1.132642.GTGGCC.anqtp.hR_trimmed_contig_124329_trimmed	Lake Erie Diel 2014	4.68e-25	31.84	50.28	GGTCAAATCTCTCGCAGTTGGTTTTACCCCAGAATAATGGTCGACTTGAGGGATCCATTTTCCATTACTGTCAGCCCTGTAAATAGTTGCGAGTTGATTAATATCGGGAAGATCATCTACATTGAAAGATCCTGTGATTCCTAATTAGTTTAATAATTATTGTTTGGCAAAAATATCAAATCGAATTCCTGATAATCTTTCTATTATTGTGCCAGCGATCCCAAAATTAGTGTTACAATAAGTGAAATATGTTCCAGGGGCATGATTTAAAAAATTTTGAGTATCATAATATGATCCTGATTCGGTTAAAAGCCATTATATTTCGGGAGGGGGGTTTAAATTTCCTGTATCGCTCAAAAATTGGTCGTATTTCGGTCCATCTCTTAGACTTGAAGTGTG…
>Diel1s_2200h_metaT_9422.1.132642.GTGGCC.anqtp.hR_trimmed_contig_129829_trimmed	Lake Erie Diel 2014	1.3e-12	26.67	44.64	AAGCGCTCTATCTGCGCGCTCATCCGCGACGGACAATTCCTGCGTGAGAATGCTCACAAGTCGTGCAGCGATGGCAACCGGTTCAGACGGACCCTGATTGACGAGCACCGCCAGACCGACGTCGATCGATGGAACGTAAAGAACGATACTTTCATAACCCCGGATCGATCCTGTGTGACCCAGCACGACATTGCCGGAAAGTATCTGGCGGCTCACTCCCAGTCCGTACGTCACGGTATCCATGTACGTATGCATCTCGGCTAGCGAGGCCTCCGATATAACCTCTCCTCGGTGCAGCGCACGCATGAACGTGGCGATCTCGCGTGCCGTCGAAAACACCGCGCCGGCCGTCCATGCACCACTGAATGCCGCATTGATCGGTACGTTCTGTCCGCTCTG…
>Diel1s_2200h_metaT_9422.1.132642.GTGGCC.anqtp.hR_trimmed_contig_130666_trimmed	Lake Erie Diel 2014	7.01e-13	30.3	45.45	GCAGACCTGGAGAACAAGCTTCTGGCCGGCACCGGCTGTGTCATGAGGATTGCCAGCATCAGCAAGTGCCTGACGATGGCTGTGTTGGCCCGGCTGTGGGAGGAGGGGCGGGTGGAGCTGGACCAGAGCGTGTCCCACTACCTCCCCACCTGGCCAGACAAGCTGGTGGACGGCCAGCCAGTCAACATTACGCTCAGGCAGCTCTGCAGCCATCTCGGCGGTATCAGGCATTACACAAAGAAGGGGCAGAAGGAAGAGTCTGACTCTGAATTCAAGCTGGCCGAGTATCACCTCAAGGACACTTTCAACACCACCGAGGATGCACTCAAACTTTTCCAGGACGACAAGCTGATGTCAGTGCCGGGTAGCGAGTATCTCTACTCCACGCACGGCTTCACT…
>Diel1s_2200h_metaT_9422.1.132642.GTGGCC.anqtp.hR_trimmed_contig_141817_trimmed	Lake Erie Diel 2014	9.42e-11	25.35	48.59	GATGCTTGGGACGTCGGCAACATTAAAGCTTGATTTTAGCAACATTTTTTCAAATATTCTTTATTTGACAAAAATATCAAATCTTTGTCCTGAGATTTTTTCAATGATCGTTCCTACTATACCGAAATTCATATTGCAATATACATAATAAGTTCCAGGTGCGTGTAAATGATAATTTTTCTCACTGTAGTATTTACCACCAAATGCTAATAGATCGCTAGTTTATGGTGGAGGGTTTACATTGTAACTAGCTGTCAAAAAATCATCATATAGAGGACCATCATTTAGACTGGAAGTATGTGAGAGAACATGTTTAAGAGTTATGATCGATTCAGGAAAATTTGGATTTCGTAGTTTAAAACCTAGATACAGGCTTACATCTTCATCAAGATTTATTTA…
>Diel1s_2200h_metaT_9422.1.132642.GTGGCC.anqtp.hR_trimmed_contig_146421_trimmed	Lake Erie Diel 2014	1.87e-08	36.49	51.43	GAAATAATCCGGCAAGCCACTGGTATGGGCCAGCAGGTGGCGGATGGTGATTCCGGCGCTGTAGTCTTTCCCCTTGAACACATGGATTTTGCTCCAGAGCGTTTCCGGCAGAAGGGAGGCGATGGGCGTTTCAAGGCTCAGCTTGTTGCGGCTGATTTGTTGCAGGATGAGGGCAGTGACGAACAGCTTGGTGGTGCTGGCGATGAAGAAAGGCTGATCCGGCTGACTATTTCCCGCGCTGCCGGTCCAGCTTGCGTCGCCTTGGCGCACGCTGAAAACAAGGGCTGGAAACTGTGGCTC
>Diel1s_2200h_metaT_9422.1.132642.GTGGCC.anqtp.hR_trimmed_contig_148564_trimmed	Lake Erie Diel 2014	2.37e-14	25.63	44.72	ATCAGTGAGGGGACGATCCCCGGCGCGGTGGCCCTGGTAGCGCGCAAAGGCAAGATCGTCCATCACCAGGCGTATGGCCTCGCCGACACCCAGTCGAACCGGGCCATGAAGCGTGACGACATCTTCCGGATCGCCTCGCAGTCCAAAGCGATCACGGCGACCGCCGTCATGATTCTCTGGGAGGAGGGGCGCTTCCGGCTCGACGATCCGGTCTCCAGGTATATTCCCGAGTTTCGGAACATGCAGGTTCTGAAGAGTTACAACGAGCCGGACGGGAGCTGGACCGGCGAGCCGGCCAAACGCGAGATCACCATTCGCCACCTGCTGACGCATACTTCAGGTCTTGGCTACGGGCAGATCGACGCCGATCCCCGCTTCAAAAAGATCTATGAGAAGGCC…
>Diel1s_2200h_metaT_9422.1.132642.GTGGCC.anqtp.hR_trimmed_contig_16325_trimmed	Lake Erie Diel 2014	2.08e-23	26.39	43.4	ATTGTAAAGAAAGATTACGGCATGATCCCGATCGGGGACAAATAAAAACGTACTTCTGTACCCTTTTGCCGAGCCATTTTTTGAAACAACTTCCACTCCCCCCAAATAGTTAATCATCCAGCCTGGAGAGCCAGGAAGGTTCGGTTGGGTAGGCTCCAACATCTGGCGGTAACTGGCAGGACTGAGGAGTTTATTCTTGCGGATGGCATTGTAGAATTTGAGCAGGTCACCAAGAGTTGACTGCATGAATCCTGAAGGGATGTTGTAAAGTCCGCCAGGTGGCATTACTTGGTCAACGGGCAGTAATTGCCCATTTCTATCAGCATTTATGTATCCAGTCGCTGTATTGGCATCTCTAAGTCCAAATCCTGTGCGGGTCATACCCAGCGGCAAGAATAT…
>Diel1s_2200h_metaT_9422.1.132642.GTGGCC.anqtp.hR_trimmed_contig_171421_trimmed	Lake Erie Diel 2014	1.05e-07	40.48	57.14	GGTCATGCCCGTCGGAACCTTCAGCCGGCTCGTGGTGAACTGGTTGTAAGTGACCCCAACGGCGTTCTCGACAATCTTCTCCATCAGGGTATAGGGCGCGTTGTGATAGGCCCAGCGCGTTCCGGGTGCTGCCTTATAGGTAAGGCAGGAAGGCAGGGTGCAATCGTCGTCGGCTACAGCATCGTCGAGTCCGGTGCTCATGGTAAGGTGATGGCGCACGTTGATAGCGGCTTCCTGAGTGGCGGTCAGGGAAGACCAGCCTTTGCCGAGGTAACGCGCACTCGTGTCGGTGATGCGCAGCTTGCCTTCCTCCTGCGCCAGTCCGGCAAGAAAGGTCGTAAGTGTTTTGCCTGCCGAAGC
>Diel1s_2200h_metaT_9422.1.132642.GTGGCC.anqtp.hR_trimmed_contig_19968_trimmed	Lake Erie Diel 2014	1.52e-12	32.11	49	AATGCCCGCAGTATGGGTGAGCAAATGACGGATCGTGATGGGCCTGGTGGCAGGTCGGGTTTCCAGGGTACTGGAGACGGAATCATAGCTTACCAGTACACTTGGATTGGCAAAATACGGGATGTACTTGGACAGTGGATCGTCGAGCAGGAGTTTGCCCTCTTCATTGAGCATGAGGATGGCTGTCGTAGTAATCGCTTTGGTCTGGCTGGCAATCCGGAAAATATCGTCCCTTTCCAAGGGCATTTTCGTTTGCATATCCCTGAATCCGAATGCTTTGTAGTGGATAATCCTGCCCCGCTTGGCGATGAAGGTAGCAGCGTTGGG
>Diel1s_2200h_metaT_9422.1.132642.GTGGCC.anqtp.hR_trimmed_contig_261341_trimmed	Lake Erie Diel 2014	5.63e-18	31.25	47.5	AAGCTGCCCATCTCGCCGAACGTAATAGCGGCCGCGATTCAACACCACTTCCTCAATGCGATCTGGCTCCGTCGATGTCATGCCAAAAGGCAACAGCACAGACTGATCCAGATGCTCAAGAAACGGCTTTTCGGCGGCCCTCTCAATTACGACACTCAAGAGGTTGTAACCGTAGGACGAGTACCGCCACTCTGTACCAGGAACACAAACCAATGCGTCGTCCTGAAAGACTTCCAGTGCCGCCGCTGCACTGAGGTAGCGCGTACGACTATATGCCTCATCGCCGGCGTAGTGACGCACGCAAGCGAGATGCCCTGCCAACTGCGCGACCGTGAATGTGTGTTCCTTCGGAGGGAACTGCGGGACATAGCGGCGAACGTCCTGCCCAAGATCGACTTT…
>Diel1s_2200h_metaT_9422.1.132642.GTGGCC.anqtp.hR_trimmed_contig_263714_trimmed	Lake Erie Diel 2014	1.97e-07	26.51	43.37	AAGACCAGAGATGTCGCCGAGAAGTTGGCGGATGGTTACGTTTTGGCTGTTGAAGGGGTTGCCGATGCTGAAGGTGGGGAGAAGGTTGACCAGGGGAGTATCGAGGGAGAGGGATCCTTTCTCTCTCAACGCGAAGGCGGCCAAAGTGGTGAACAACCTGGTCAAACCTCCAATCCTGAAGAGGGTATCGAAGGTAACGGGATCAGCGTCAGAGGTATTCTTTGATCCAAAGGCATTCTTGTAGATGACGTTTTTATCGTAGACGATACCAATGGTCATACCGGGGATGTCCAAATCCGTCATCAAATCCTGCCAGGTCCTCTCGAGGGTCTT
>Diel1s_2200h_metaT_9422.1.132642.GTGGCC.anqtp.hR_trimmed_contig_31835_trimmed	Lake Erie Diel 2014	1.73e-05	25.84	43.82	GCCCAGGGGCTCGGCGATCTCGGTGCGGAAGACGGTCCCCAGGCTGGCGCCGGTGATGCGGCGCACGACCTCACCCACCAGATAGCCCTGGGTCATGCCGTGGTAGCCGGGGGCGGTCCCCGGCTCCCAGAAGGGCGCCTGGGCGGCGAGGAGCGAGGTGGCCTTCTCCCAGTCGTAGAGGTCCTCGACGGTGATGGGCTCCTTCCAGCCCGACAGGCCCGAGGAATGGCTCATCAGGTGGGCGACGGTGACGGCGGACTTCCCGTTGGCCGCGAACTCAGGCCAGTAGCGGGCCACGGGGGC
>Diel1s_2200h_metaT_9422.1.132642.GTGGCC.anqtp.hR_trimmed_contig_332296_trimmed	Lake Erie Diel 2014	1.34e-09	28.89	51.85	GCCTTCCCATTGACCTTTGTTCAGGTACAGCCTGCCAAACTTGGCATAATCGCGTGCCCGGGCATTGATGCAGCAAAAGGTCTTTTCCATGCCGGTTTTCTTGTCGTCAATGCTCCAGCCGGCATCGAACTCCATACCCAAGGGCGTCCAGATTTTCCGTTGCAGGTATGCCGTAATGGTTTCGCCTTTCAGCACCCTTTCCAGCACAAGACCCAACATCTCGGTCGAACCACTTACGTATTCCCATTGTTGCCCCGGGGGGCGTTTGGTTTTTAGATCAAGGATGCGCTCTCTCAGATTGCGGCCATAATAAAAAGAAGCAGCCTCAGTGAAGGGCGAATAATAGCCTTCGTCGAAGTCCATTCCCGAAGTCATGTTTAGCAAATGGCGCAGACTTAC…
>Diel1s_2200h_metaT_9422.1.132642.GTGGCC.anqtp.hR_trimmed_contig_347949_trimmed	Lake Erie Diel 2014	3.81e-08	33.01	51.46	CGTGGACGCGGGCAGGTAAAACCAGGTATCCTTCATGCCCAGCGGCCCGAATATCCGCTTTTGGAAAAATATATCGAGACTCATTCCCGAAACCACCTCTACCAGATAGCCCAGGACATCGGTGTTCAGCCCATACGTCCAGCGCTCCCCAGGCTGGTGGAACAGCGGCAGGGATCCGAGCCGACCCATCACCTCGGATAACCGGTCTTCCGGCGTGGCTATACCGGACGGGATCCGATACTTCGCATAAATGGCTTTTGCCTCTGCTGAGCCTATCCCTGCGTAACCTATACCGGAAGTATGGGTGAGCAAATCCCGGATAGTAATCTCGCGGTTTGCAGGAACGGTCGTAAACGTGGTATCTTTGGCATTATATTGATCGATTACATTCGGTTTTTT…
>Diel1s_2200h_metaT_9422.1.132642.GTGGCC.anqtp.hR_trimmed_contig_356954_trimmed	Lake Erie Diel 2014	1.23e-30	40.12	54.22	GGCGTCGCCGGTGAACAGCGTGCCGCGCAGGCCGGCGGGGGTGAAGATGGCTTGCGTGCAGTAGACGGGGTAGTCCTGTCCGCTGGCGCGGGTGATGATCTCGGCGAGCAGCGCGTAGCCCTGATTCCAGTACTCGAATCGCGTGCCGGGGGTGTGGCGCGGGCCGCCTTCGAGGAACAGCGGGAGCACGGCGGCAAGGTCGCTGCCGGCACCCTGGGAGTTGCCGCCGGGGATGCCGGAGGTGTGGTGCAGCAGGTGGGCGATCGTGATCGATGCGCTCTCCTCGGGCACGCCGGGCAGGTGCCTGGCGATCGGGTCATCGATGTTCAGCTTGCCGTCCTGCTGCAATCGCAGGATGGCCGCGGCGGTGAACTGCTTGCTCAGCGAGGCGATTTCCAA…
>Diel1s_2200h_metaT_9422.1.132642.GTGGCC.anqtp.hR_trimmed_contig_361120_trimmed	Lake Erie Diel 2014	1.19e-15	35	50	CGTCGACGCCATACCGAGTGGCACGAACAATCGCTGCTGCAGAACCTCGGCAATGGGAGCCCCCTCCAATACCTCGATGATGCGTCCCAACAGCTGGTAGTTGGTGTCGGAGTATTCGGCCCGACCCGCCTGCCCGGGCCTGAATGCAGGGCGCATGCCACGCGCACGCTCCAGAACATCCTCTAGCGTCCACGATCTGTCGCTGCCGGCAAACAGCTCATCCTGCAGGCTCCTACCATGTACCTTTCGCTGGAAGTAATCCGGAAGTCCGCTCGTGTGCGACATCAGCTGCCGGATCGTCAGCGAAGGGGCTTGCTGCACCCCATCGATGATCAGCAGGTCCCGCAGCAGTTCAGCACCGAGATACTGACCGATCGGATCATCAAATCCAAGACGTCC…
>Diel1s_2200h_metaT_9422.1.132642.GTGGCC.anqtp.hR_trimmed_contig_364697_trimmed	Lake Erie Diel 2014	5.52e-15	33.1	44.83	GGCCTTCTCAAAGGCCAGGAGGTCATCAAGGCTCGTGACGATGCCCCCGCAGCCGCGGTAGCCCCAGGCCCACGGATGATCGACCTGCGTATGCCCGGGAATTCGGCTCGCCGCACGCGGGCGGAGGCGATCATCGCCGAGGAAGCCGGTGCTCTTCATGCCAGCGGGGTCGAAAATGCTCGACTTGATCCGCTGCTCAAAGGGCTGGCCGCTGACCTCCTCGATGATCGCCGCCAGAACGATGTAGGCGTGGTTGTTGTACGAGAAGCGCTCGCCCGGCGGCGCGATCGACGCCGAGTCCATGAAGTCGCGCACGACCTGATCGCGGTCCTCGGCCAGATACGGCGGCATCTTGCTGTCGTTGTCGCGTCCGGATGTGTGCGAGAGCAG
>Diel1s_2200h_metaT_9422.1.132642.GTGGCC.anqtp.hR_trimmed_contig_386175_trimmed	Lake Erie Diel 2014	1.49e-15	26.71	50.68	GCGGCCGGATACCCGTTGGATCACGAGACCCGCCACCATGTACAGGTTGTTTTGGTAGCCGAATTCGCTTCGGAACTGCTTATGGAGAGGAATATGGCGGAGCCGTGACAAAATCTGCTCATCCGTGTAATCGGTCCCGTACCACAGCAGGTCGCCGTAGAACGTTTCCAATCCGCTGCGGTGACAAAGCAAGTCCCTGATTGTCAACTGCGCCGTGATCCAAGGATCGGACAATTGGAAGCCCGGGACGTAGTCGATCACCTTGTCATCCCACTTGACCTTGCCCTGTTCGACGAGCATGGCCAATGCCGCAGCGGTGAACGCTTTGGTGCAGGAGGCGATGTTGAACACGGGTTTCGTGTCCATCGACACTTTCTTGTCGGCGGATTTGAGCCCGAA…
>Diel1s_2200h_metaT_9422.1.132642.GTGGCC.anqtp.hR_trimmed_contig_389489_trimmed	Lake Erie Diel 2014	5.81e-15	34	52.25	TACACCCGTCCGGTGCGCCAACATATCAGTAAGCGAGGCTTGCTGCGTACGACACTGAGAGTCGTCTTGCCGATCCACAGGAAGCATAAAGTCAGGGAGAAAATGTGTGACTGGATCGTACAAATTCAAAATGGCGTCGTCGATTAACATGCCGATTAGGGTGGAGGTAAAAGCCTTCGTAGTACTACCAATGCCAAACATTGTTGTGCTCGTCACAGGTAACTGCCTTTCGAGGTCTCGAAAGCCAAATCCATCAGAAAAGACGACTTCTCCTTCATGAACAACGGAGACGCTGAGACCAACGACATTTGTGCAATTCATTATGTCCCTCAG
>Diel1s_2200h_metaT_9422.1.132642.GTGGCC.anqtp.hR_trimmed_contig_479111_trimmed	Lake Erie Diel 2014	7.49e-08	26.55	43.36	TATTGGCCCGAGATCGTAAGCTCAGCGTACGGCCAGACGACGATAAAAAACCTTCTCTATATGGGATCTGGCGTGCCGTTTAAAGAGCTGTATACCTGGACGACTGGGGACGATAATTGGGTCTGGGGTCAGGTGCTTTACGGACAGAGTAACCGCAGAAAGCCCGAGGCCATCACAGAATTTCTGAATTCAAAAACCCTCCGAGATGTGGAACAAGGGTCGCGCTTTCACTATGCGTCAATTGAAACGGAGATTCTAGGAAGAGTGCTCAGAAGGGCGACAGGCAAGACAGTTACTAAGCTCACCGAGGAATGGCTGTGGACGCCCATGGGG
>Diel1s_2200h_metaT_9422.1.132642.GTGGCC.anqtp.hR_trimmed_contig_497704_trimmed	Lake Erie Diel 2014	8.47e-26	46.73	60.75	TATCAGCGTGGCTACGGGATGGCCAACCTCGACCACTCCGTCCCGCTTGATGGAAAGAGCGTCTTCTACATCGCCTCGACCTCGAAGCAGTTTACAGCGATGAGCATCGCCTGGCTGGTCACCCGGAGGCGGCTAAGCCTGACGGACGATATCCGGCGCTACCTGCCGGAGCTGCCCCGCTGGGAAACGCCGGTGACGATTGGCCACCTCGTCCACCATACCAGCGGAATTCCAGACTTCTTCGTGCTCTTCCCACTCGCCGGGCGTCGGCTGGAGGACACGCTCAGCGACGAGGAGATCCTCGCGCTTCTCGCCCGGCAA
>Diel1s_2200h_metaT_9422.1.132642.GTGGCC.anqtp.hR_trimmed_contig_503276_trimmed	Lake Erie Diel 2014	1.67e-05	25	43.18	GAGGATCAGCACGTCGGTGCTCAGCCCGTAGTTCCACTTGGCGCCGGGTTGGTTCGTCAACGGCAGCTTCGCGACGCGCTTGATCTTGGGCTCCAGTTCTTCATGGGGGTTGAGGATGTAGGCCTCGTTGTACATCTGGTCGACGGGGGTGGAGTCCATGAAGCCGTAGGTCAGGCCGGCGGTGTGCGTGAGTAGGTGGCGGATGGTCATGGGGCGTTCCAGCGGCTCCGTGCCCCCCTTCCCCCCGTTGGCCGTGGGGTTGTAGACGCGCACGGTCGCGAACTCGGGCAGGTACAGCGAGACCGGGTCGTCCAAGTGGACACGGCCCTCGTCCACCAGCGTCAAGAAGGCGGCCGTGGAGATGGGCTTGCTCTGCGA
>Diel1s_2200h_metaT_9422.1.132642.GTGGCC.anqtp.hR_trimmed_contig_559603_trimmed	Lake Erie Diel 2014	1.51e-05	22.58	46.67	TCCGATCTTCTCCCACACCTCCTCTTGGAAGAAGTCAGCGACTCGCATCGCGGTGACCTTCTTGATGATCATTCCGAGCATCTGAGTATCGACGCTTCGATACTCGGACTCCGTCCCTGGATCAAAGGCCATCTTCCGGTTGTTCTTCATGAACCAGTCGATATCGGTGGTTGCATACATCTGAGCGATAGCAACCCCCCACCCTTGTGGTCCGGTGGGATAGTCATCTGAGACTCCAACACCTGCTTGCATATCGAGAAGGGTCTTGATGGTGACATCATCAAAGCTACTTCCATTAGCAAGGTCAGGGAAGTAATCGACGAAGCGATCACTCTCTGAAATCTTTCCCTCTTCGATCAAACGACCTATGAG
>Diel1s_2200h_metaT_9422.1.132642.GTGGCC.anqtp.hR_trimmed_contig_66602_trimmed	Lake Erie Diel 2014	7.05e-10	27.13	40.96	CCCCTGCCATTTTCCGCGCTGCAGATAGAGCTGACCGAACCGGGCAATCTCCCGGGTGCGAAGCTTGAGCCCCCATCCACCGCTGGTCACCCCCTGGGGGCTGGTATTCCAGACTGGATCGGTGATTCCGAGCGGGTTGAAGAGGCGTGGGCGCAAATACTCGATCAATGGCTCACCCGTCTTCTTCTGAATGATCGCCGAAAGCATATGGCTGGCCGGAGTGTTGTAGAGAAAGAAGGTGCCCGGCTTATGATCGAAAGGATGGGCAAGAAAGTTCTTCGTCCAATGATCACCTGCGCGGTTACTGGCCTCTGAGTGCTGCCCGGTCGACATTGCGAGGAGGTCGCGGATTCGCAATGCCTTCAGGTTTGTCCCTGGATCGGCTGGAGCATCTTCCGG…
>Diel1s_2200h_metaT_9422.1.132642.GTGGCC.anqtp.hR_trimmed_contig_72601_trimmed	Lake Erie Diel 2014	8.35e-10	24.34	40.21	GCTGCTTTGCAAGTTTAACGGCTCGAAAATATTTCTTTTCAGATAATCCTGGTACTTCAAGCCACTTAACTTTTCGATCATATAAGTTGCAAGAATAAAGCTAGGATTTGAATAGGAGAAGTTGGTCCCCGGAGTGAATATTAGAGGATTGTTGATGAATAGTCCTACGTAAACTCCTACAGTGCCCAAAAATTCCCCAGTATAGACTTCATAATCCTTTAGATCATTACCTATACCCGAAGACATGGAGAGCAGTTGCTCGTATGTTACATCAATGCATGTTCCGTTTGGCATGTCTTGAACTTGAGGACACCACGAAGTTTGGTTAGGAAATCCAAACTTGACAAAATCATCTTGTGTAAGGTCATCGTTAATAGGCTGTGATAAGTTAACTTTGCC…
>Diel1s_2200h_metaT_9422.1.132642.GTGGCC.anqtp.hR_trimmed_contig_78042_trimmed	Lake Erie Diel 2014	5.79e-10	27.93	47.49	ATCGGTGGCGGTGCTGAAGAGGCCGGCGTGGCCGGCGACGCCGCCCAGTGCCCAGGCGTTCTCGTCGTGCACCTCGCCGCGCAGCGGATAGCCACGCGGGGGGGCCACTTCCGTCGGTGCCGTGCGAGCCACCTCGTCAGGGTCCACGCCGAAGCGCGTATCACGCATCCCCAGCCGGTGGAACACCTCGTCCTGGAGAAAGAGCTGCAGGGGGCGATCGGCCACCGCCTCCACGATGAACCCCAGCAGGTCGGCGCCGAGGTCGGAGTAGGTATAGCAGGTGCCTGGTGGGCACTGGATCGGCGACCGCAGGACGGCCTCGCGCGCCTGGGCCGGCGTGCTGGCCACCCGCCAGAGCTCACGCCCCGCCGGGAGTCCGCCCCGGTGCGTCAGCAGGTG…
>Diel2S_0400h_metaT_9179.2.124619.CTTGTA.anqtp.hR_trimmed_contig_107651_trimmed	Lake Erie Diel 2014	1.97e-07	26.51	43.37	AAGACCAGAGATGTCGCCGAGAAGTTGGCGGATGGTGACGTTTTGGCTGTTGAAGGGGTTGCCGATGCTGAAGGTGGGGAGAAGGTTGACCAGGGGAGTATCGAGGGAGAGGGATCCTTTCTCTCTCAACGCGAAGGCGGCCAAAGTGGTGAACAACCTGGTCAAACCTCCAATCCTGAAGAGGGTATCGAAGGTAACGGGATCAGCGTCAGAGGTATTCTTTGATCCAAAGGCATTCTTGTAGATGACGTTTTTATCGTAGACGATACCAATGGTCATACCGGGGATGTCCAAATCCGTCATCAAATCCTGCCAGGTCCTCTCGAGGGTCTT
>Diel2S_0400h_metaT_9179.2.124619.CTTGTA.anqtp.hR_trimmed_contig_145790_trimmed	Lake Erie Diel 2014	6.79e-12	26.79	44.71	AAGCGCTCTATCTGCGCGCTCATCCGCGACGGACAATTCCTGCGTGAGAATGCTCACAAGTCGTGCAGCGATGGCAACCGGTTCAGACGGACCCTGATTGACGAGCACCGCCAGACCGACGTCGATCGATGGAACGTAAAGAACGATACTTTCATAACCCCGGATCGATCCTGTGTGACCCAGCACGACATTGCCGGAAAGTATCTGGCGGCTCACTCCCAGTCCGTACGTCACGGTATCCATGTACGTATGCATCTCGGCTAGCGAGGCCTCCGATATAACCTCTCCTCGGTGCAGCGCACGCATGAACGTGGCGATCTCGCGTGCCGTCGAAAACACCGCGCCGGCCGTCCATGCACCACTGAATGCCGCATTGATCGGTACGTTCTGTCCGCTCTG…
>Diel2S_0400h_metaT_9179.2.124619.CTTGTA.anqtp.hR_trimmed_contig_15810_trimmed	Lake Erie Diel 2014	2.08e-23	26.39	43.4	ATTGTAAAGAAAGATTACGGCATGATCCCGATCGGGGACAAATAAAAACGTACTTCTGTACCCTTTTGCCGAGCCATTTTTTGAAACAACTTCCACTCCCCCCAAATAGTTAATCATCCAGCCTGGAGAGCCAGGAAGGTTCGGTTGGGTAGGCTCCAACATCTGGCGGTAACTGGCAGGACTGAGGAGTTTATTCTTGCGGATGGCATTGTAGAATTTGAGCAGGTCACCAAGAGTTGACTGCATGAATCCTGAAGGGATGTTGTAAAGTCCGCCAGGTGGCATTACTTGGTCAACGGGCAGTAATTGCCCATTTCTATCAGCATTTATGTATCCAGTCGCTGTATTGGCATCTCTAAGTCCAAATCCTGTGCGGGTCATACCCAGCGGCAAGAATAT…
>Diel2S_0400h_metaT_9179.2.124619.CTTGTA.anqtp.hR_trimmed_contig_205408_trimmed	Lake Erie Diel 2014	4.27e-25	39.31	53.1	GGGGTAGTCCTGTCCGCTGGCGCTGGTGATGATCGCGGCGAGCAGCGCGTAGCCCTGATTCCAGTACTCGAATCGCGTGCCGGGGGTGTGGCGCGGGCCGCCTTCGAGGAACAGCGGGAGCACGGCGGCAAGGTCGCTGCCGGCACCCTGGGAGTTGCCGCCGGGGATGCCGGAGGTGTGGTGCAGCAGGTGGGCGATCGTGATCGATGCGCTCTCCTCGGGCACGCCGGGCAGGTGCCTGGCGATCGGGTCATCGATGTTCAGCTTGCCGTCCTGCTGCAATCGCAGGATGGCCGCGGCGGTGAACTGCTTGCTCGGCGAGGCGATTTCCAACAGCGTCGCGGGGGTGTTGGGCACGGTGCCCGACTCATCCGCGAAGCCGACGCCGGTGGCGGCGAT…
>Diel2S_0400h_metaT_9179.2.124619.CTTGTA.anqtp.hR_trimmed_contig_232290_trimmed	Lake Erie Diel 2014	3.31e-14	32.26	49.19	TATTGTGCCAGCGATCCCAAAATTAGTGTTACAATAAGTGAAATATGTTCCAGGGGCATGATTTAAAAAATTTTGAGTATCATAATATGATCCTGATTCTGTTAAAAGCCATTACATTTCGGGAGGGGGGTTTAAATTTCCTGTATCGCTCAAAAATTGGTCGTATTTCGGTCCATCTCTTAGACTTGAAGTGTGCGACAAAATTTGGCGAGTAGTTATAGGAATATTTGGAAATTGAGGATTTCTGACAGTAAAGCCTAAATATTGACTAATATCTGCATCTAAATTTAATTATCCTTCATCATATAAAATCATCAAACATGCGCTTGTTATTGTTTTTGATATAGAGGCGATACGAAATTTAGT
>Diel2S_0400h_metaT_9179.2.124619.CTTGTA.anqtp.hR_trimmed_contig_262406_trimmed	Lake Erie Diel 2014	7.07e-12	25.93	47.5	CTTTGTTGAGCCAATGGCCATTCTCGTGATGCCGCTTGGGGCCAAGATAGCGTTCTTGATGTACTCCTCGTAAGTTTGGCCGCTGACAGCTTCAATCACTCTTCCAAGTACAGTGTAACCGAAGTTGGAGTATTGGTAGGTGGAGCCAGGTTCGAATTGCAAAGGCTTCTCCTTGTACCAATTCACCAACTCGGCGGTGGTTGGGAGTCTGTCAGTGATTCCCATCTCCTTTTGCCAGGTTACTACACCTCCTCGCATGGTGGGTTGCAAAACATTTTTGTCCCAACCGGCCGTGTGGTGAAGAAGCTGCTCGATGGTGATGTCTTCAATTCTGGGGTCTCGCTGTTTGGCTTCGAATTCGACTTCTTCAGTGAGAAATTCCTTGAAGGGTTGGGTCTC…
>Diel2S_0400h_metaT_9179.2.124619.CTTGTA.anqtp.hR_trimmed_contig_63136_trimmed	Lake Erie Diel 2014	5.33e-08	27.97	46.85	GTCCACGCCGAAGCGCGTATCAAGCATCCCCAGCCGGTGGAACACCTCGTCCTGGAGAAAGAGCTGCAGGGGGCGATCGGCCACCGCCTCCACGATGAACCCCAGCAGGTCGGCGCCGAGGTCGGAGTAGGTATAGCAGGTGCCTGGTGGGCACTGGATCGGCGACCGCAGGACGGCCTCGCGCGCCTGGGCCGGCGTGCTGGCCACCCGCCAGAGCTCGCGCCCGGCCGGGAGTCCGCCCCGATGCGTCAGCAGGTGGCGGACGGTGACCTGCTCCCGCCGGTTCCCCGTGAATTCCGGCAGATAGCGCGACACCGGCGCGTCGAGCTCCACCAGCCCGCGGTCATGCAGCACCATCATCGCCGTCGTGGTGGCCACGACCTTGGTCAGCGAGGCGAC…
>Diel2S_0400h_metaT_9179.2.124619.CTTGTA.anqtp.hR_trimmed_contig_74408_trimmed	Lake Erie Diel 2014	6.02e-11	30.37	46.67	CATTCCGAGCTTTTGCGACAGCTGTTGGTTGTAGTACTGCTGGAAGGTCCTGTTTGTGGCTTTCTCGATCATATCCTGCAGTAGCAGGTAACAGGCATTGTGGTAGTCCCAGATCGTTCCGGGTACGGCACGATATCGAAGGCACTCCGGCGTCTTGCAGTTGTCATTGCCGCGGTCGAATCCGATTCCCGTCGTCATCGTCAGGTGATGACGCACGGTGATTGCATCCTCTTGCTGTGGTGTACAGGATGACCAGCTCCTCCCGAGATAGGTGGCGCTGGTCTTGGAGATGTCCATCTGTTTTTGGTGCTGCGCGATACCGACCAGCGCGGCCGTCACGGTCTTCCCGGCAGAGGCCCAGTACCAGAGACTATCTTTTGTGAATGATCCGAAGTACTG…
>Diel3S_1000h_metaT_9179.3.124622.AGTCAA.anqtp.hR_trimmed_contig_106809_trimmed	Lake Erie Diel 2014	3.5e-16	28.14	47.37	AATCGCTTTTTCCCGGGAAAGGTAGAAATGGGTATCGTCCATCCCGAGTGGATCGAAAATCTTTTGCTTGAAAAAAGAGGCCAGACTTTGGCCAGCCACGATTTCGACAACATAACCGAGGATATCGGTAGCCAGGCCATAGGTGAATTGTTCTCCCGGATCGTGGAGGAGCGGGCGCGACGCAATTTTGGGGATTACCATGGAAAGGGTAATGCTGTCGAGCGCGTTGAAGTAAGGCACCTGGTACTCGGAAAGGTGCTCCAGGGGGTGCTCATAAGGAATGCCCGCAGTATGGGTGAGCAAATGACGGATCGTGATGGGCCTGGTGGCAGGTCGGGTTTCCAGGGTACTGGAGACGGAATCATAGCTTACCAGTACACTTGGATTGGCAAAATACGG…
>Diel3S_1000h_metaT_9179.3.124622.AGTCAA.anqtp.hR_trimmed_contig_156739_trimmed	Lake Erie Diel 2014	4.08e-16	27.1	44.62	TCAATAACCGTGCGTCAGTTGCTCGGCCATCGAAGTGGCCTGGCAGATTACTCGTCCGCCACCGAGTACCGGTCGGCGGTTCTTGCCAACACGAACCGCATCTTCAAGCCGGAGGACCTGCTTGAGTTCATCAAGGAGCCCCTTGCCAAGCCCGGAACAGTCTTCAACTACTGCAACACGAATTACCTGCTGGCAGGTATGATCATTACTAAGGTCACTGGCAAAAGCATCGGGAACGTTTACAGGGAGTACATCCTCAGCGGTCTGCAGCTCGACAGCACGTATATGGGCGTTGAAGATTCGTTGCCGATCGAGGTGGCTGTTCGCTGGATGGGACCGCAGAGCGGACAGAACGTACCGATCAATGCGGCATTCAGTGGTGCATGGACGGCCGGCGCG…
>Diel3S_1000h_metaT_9179.3.124622.AGTCAA.anqtp.hR_trimmed_contig_156750_trimmed	Lake Erie Diel 2014	4.05e-10	36.84	50.59	GATGCCGGTGCGGTGCATGAGCAAATCGCGGAGGCTGACCAGTTCGAGATTGGCGACCCTCTTGCGTTGATCGGCAGTGAAATACGCAGCGACCGGAGCCTCGAGGTCAAGCAGTCCCTGTTCGGCCAGACGGAATACCGATGTGGCCAGGAAGGGTTTCGTGACACTGCCGAGCTTGCTCACCGTGCAGGGCGTGAAGTTGATACCTCCGCGGATATCGGCGAGCCCGGCGGCACCGGTGTAGATACCGCGGCCATCTTCCACCCGCACGGCAATGCCGGGGAGGCCGAGGCGGATGTATTTCTGCAAGAGCGCTTCATACTGTGCTGCCTCCGGATGCGGCGCAGC
>Diel3S_1000h_metaT_9179.3.124622.AGTCAA.anqtp.hR_trimmed_contig_164624_trimmed	Lake Erie Diel 2014	5.55e-08	37.25	56.86	CGGACTGGCCCATTCGGTATTGCACATCACTGCAACGCCCATACCGCGATTGGGGTAGCACACAAAAATCGTGCGGGCCTTATTCTGGCTTCCACTATGGGCAACACAAAGGTCGGCCCCTGTGCCTTTTATTTCAAAGCCCAGGCCATAATCCCATTCCGGCTGACGGGTCCATATCTTTTCATAAGAAGCCGGCTGAAGCAAGTCTCTGAATATTAAACTCTTAACATATTTCGACAAATCAACGATATTCGATTGATACCCGCCACCGGGAATTTTCCAACTGACATCATCGTCCACCCGCGGGCGGATATCTCCGATGCGGTCCCGATAATATCCTTTGACTTCCTTGAGGTTTTCACCCCAAAGATAATCGGGTTTCAGGGAAGAAAGGCCCAG…
>Diel3S_1000h_metaT_9179.3.124622.AGTCAA.anqtp.hR_trimmed_contig_178208_trimmed	Lake Erie Diel 2014	7.55e-14	35.48	53.76	TATGGAAGTAATGCACGTGCCGTCGAGGGGCAGGTTGTTCGCGCCGAGCATCATGGCCTAGGTCATCTAGAGTGGCAGCAAGCGCTGGCCGGAAATACTCGCTTCTATCTGGCCTCGGAGACCAAGTTCTGGGTTGCAGCCCTGGTGATGCAAGCGGTCGCTGCTGGCCGAATCACGCTTGATGCCGATATGCGCGACCGGCTTCCCGCACTGGCGGGCGCGCAGTGCCCCGTCCGCCTGGGTCACTTGCTGCGCCATACCAGTGGCGTGGATGACTACCTTTACCTTTGGCGTGTGCAG
>Diel3S_1000h_metaT_9179.3.124622.AGTCAA.anqtp.hR_trimmed_contig_184694_trimmed	Lake Erie Diel 2014	8.83e-17	28.42	45.55	CAGTCGTGTTTTTCCCAGTCGCGTCTGCTGCATGCCGCTGGGAATCAGGATGTGCTGGCGGACGAAGTCTTCGTAGGAGGTTTGGCTGACGGCTTCGATGATGCGGCCCAGCAGGCAGTACCCGACATTGCTGTACTGAAACTCGGAACCCGGCGCGAAGTCGAGGGGCTGCTGCAGCTGGTAGCGGACAATGTCGTTGACATTTGGCGGTCGCTCCAGCTTGAGCGAGGCTGCGATGGTGACGAGTTCAAACATGGTATCTTTGGATTTCTCGCGATCGAAGCCCGCGGTGTGCTGCAGCAGGTGACGGACCTGAATATCAGCCCAGCGGGGATCTGCCCTGATCGCCTGAGCCGTGGGAAAGCCTTCCGAATGCTGAGCCAGCAGGGGCAAAACGGG…
>Diel3S_1000h_metaT_9179.3.124622.AGTCAA.anqtp.hR_trimmed_contig_193704_trimmed	Lake Erie Diel 2014	2.04e-07	26.51	43.37	AAGACCAGACAAATCGGTCAGAAGTTGGCGGATGGTGACGTTTTGGCTGTTGAAGGGGTTGCCGATGCTGAAGGTGGGGAGAAGGTTGACCAGGGGAGTATCGAGGGAGAGGGATCCTTTCTCTCTCAACGCGAAGGCGGCCAAAGTGGTGAACAACCTGGTCAAACCTCCAATCCTGAAGAGGGTATCGAAGGTAACGGGATCAGCGTCAGAGGTATTCTTTGATCCAAAGGCATTCTTGTAGATGACGTTTTTATCGTAGACGATACCAATGGTCATACCGGGGATGTCCAAATCCGTCATCAAATCCTGCCAGGTCCTCTCGAGGGTCTT
>Diel3S_1000h_metaT_9179.3.124622.AGTCAA.anqtp.hR_trimmed_contig_206328_trimmed	Lake Erie Diel 2014	5.27e-08	28.07	48.24	GTCCACGCCGAAGCGCGTATCACGCATCCCCAGCCGGTGGAACACCTCGTCCTGGAGAAAGAGCTGCAGGGGGCGATCGGCCACCGCCTCCACGATGAACCCCAGCAGGTCGGCACCGAGGTCGGAGTAGGTATAGCAGGTGCCTGGTGGGCACTGGATCGGCGACCGCAGGACGGCCTCGCGCGCCTGGGCCGGCGTGCTGGCCACCCGCCAGAGCTCGCGCCCGGCCGGGAGTCCGCCCCGATGCGTCAGCAGGTGGCGGACGGTGACCTGCTCCCGCCGGTTCCCCATGAACTCCGGCAGGTAGCGCGACACCGGAGCGTCGAGCTCCACGAGTCCCCGGTCATACAGCACCATCACGGCCGTCGTGGTGGCGACCACCTTGGTCAGCGAGGCGAC…
>Diel3S_1000h_metaT_9179.3.124622.AGTCAA.anqtp.hR_trimmed_contig_212441_trimmed	Lake Erie Diel 2014	7.69e-09	29.75	46.28	GAGCGGATGACCCGAGATCTCTTCGGCGATGAATCCGAGCAGGTCCGCCCCGAGATCCGAGTATTCGTAGCAACGCCCCGGGGTGCACTGGACGGGCGTGTTCAAGACGGCGGCCCGTGCGTCGCTTGGTGTGTGGGCGACCCGCCACAGCTCACGCCCTGCGGGAAGACCCGCGTGGTGCGTGAGCAGGTGGGTGACCGTGACCTGATCCCGGAGCCCGCCCGAAAAAGACGGCAAGTATCGCGAAACCGGGGCATCGAGATCGATGCGCCCCTGGTCGTATAGAATCATGATGGCGGTCGTCGTGGCGACCACCTTGGTGAGCGATGCGAGATCGAA
>Diel3S_1000h_metaT_9179.3.124622.AGTCAA.anqtp.hR_trimmed_contig_212554_trimmed	Lake Erie Diel 2014	5.94e-11	25.62	45.62	GTATGGCATTCCTGCTATCTCAGCCAACAAGGTGCCCAACAGAGCGAAACCTAAGTTGCTGTATGCCGGCCTGTCATCTATGGGTTGAAGAAAGACCTCATCTTGTAGTCTGGATAAAATTTGCGCTGTTGTTAAGGAGCAGTCTCCCCAAAGACTTTCACAGGGACTCGTGCGAGGTAGGCCAGCAAGGTGACCAGCGAGTTGGCGATAAGTTATGCCTCGATCGGTTTGGAAAGGATTCTTGAGCTTTACTTGCGGGAACTTCTGTGAGATCTCCTCGTCCAAAGATATCAGGCCCTTGTCGCGCAATTGAAGCATCATCAAGGTTACAAATACTTTGGAGATAGAACCTATTCTAAAGATGGTATCGGGGGTAGGCGCAACCTTCGAAGTCCTATT…
>Diel3S_1000h_metaT_9179.3.124622.AGTCAA.anqtp.hR_trimmed_contig_286212_trimmed	Lake Erie Diel 2014	1.5e-08	39.02	57.32	TAAGAGAATATATCCCAAATCGGAATATTTAAACGCAGTTTTAGGAGGAGTATTCAACGGCTCCTTCAAAATGCATTGAACTGCGTTATCTAGACCGTTACCGAAGTCCGAGACTGGGCTGTCTGGCGCCAGACCGCTTGTATGCAGCAACAAATCTTGCACAGTGATATGCTCCTTGTCATTCACGACACCGAATAGATGGCCTAAAGTATGGTGAAGGGACAACTTTCCTTCTTGAACCAGATGCATGATGGATAGGCCCGTGGCAAAAGGCTTCGTGAGACTTGCCAGGTCAAATATGGTATCCAACGTCATGTTCTCAACCAGAGGCAAAACTGCACGATTTCCAAAGGCTTTGTGGTGGACCACTTGATCACCCTCTGCGACCAATAACACAGC…
>Diel3S_1000h_metaT_9179.3.124622.AGTCAA.anqtp.hR_trimmed_contig_28999_trimmed	Lake Erie Diel 2014	2.08e-23	26.39	43.4	ATTGTAAAGAAAGATTACGGCATGATCCCGATCGGGGACAAATAAAAACGTACTTCTGTACCCTTTTGCCGAGCCATTTTTTGAAACAACTTCCACTCCCCCCAAATAGTTAATCATCCAGCCTGGAGAGCCAGGAAGGTTCGGTTGGGTAGGCTCCAACATCTGGCGGTAACTGGCAGGACTGAGGAGTTTATTCTTGCGGATGGCATTGTAGAATTTGAGCAGGTCACCAAGAGTTGACTGCATGAATCCTGAAGGGATGTTGTAAAGTCCGCCAGGTGGCATTACTTGGTCAACGGGCAGTAATTGCCCATTTCTATCAGCATTTATGTATCCAGTCGCTGTATTGGCATCTCTAAGTCCAAATCCTGTGCGGGTCATACCCAGCGGCAAGAATAT…
>Diel3S_1000h_metaT_9179.3.124622.AGTCAA.anqtp.hR_trimmed_contig_302846_trimmed	Lake Erie Diel 2014	2.25e-15	33.57	45.45	GGCCTTCTCAAAGGCCAGGAGGTCATCAAGGCTCGTGACGATGCCCCCGCAGCCGCGGTAGCCCCAGGCCCACGGATGATCGACCTACGTATGCCCGGGAATTCGGCTCGCCGCACGCGGGCGGAGGCGATCATCGCCGAGGAAGCCGGTGCTCTTCATGCCAGCGGGGTCGAAAATGCTCGACTTGATCCGCTGCTCAAAGGGCTGGCCGCTGACCTCCTCGATGATCGCCGCCAGAACGATGTAGGCGTGGTTGTTGTACGAGAAGCGCTCGCCCGGCGGCGCGATCGACGCCGAGTCCATGAAGTCGCGCACGACCTGATCGCGGTCCTCGGCCAGATACGGCGGCATCTTGCTGTCGTTGTCGCGTCCGGATGTGTGCGAGAGCAGGTGGCGGAT…
>Diel3S_1000h_metaT_9179.3.124622.AGTCAA.anqtp.hR_trimmed_contig_311571_trimmed	Lake Erie Diel 2014	1.94e-13	31.25	48.61	CTCCATCCCCAGTGGTTTGAAGATATTCTCCTCCGCAAACTGATCGACCGGCTTTCCGCCAACCCGGCGGACCAGTTCGCCGAGCACGATATAACCAACATCCGAATAGATCATCCGCGAGCCCGGGGCGACCACCGGCGCCAGCCGCCAGATATTCTCGAGCGCTTTGGCCGGCCCCTGCTCGTAGTCACGAACCTCATTGTCGGCAATCAAACCGGCCCGGTGGGTCAGCAGCTGCTCGACGGTGATCGCCCGCTTCCCCATCTCCCCAAACTCCGGAATATACCGGGAGACCGGATCTCCCAGCCTGACCAGTCCTCGATCGACAAGGATCATGACCGAAGTGGCCGTGGCGACCACCTTCGTCAATGAGGCCAGATCGAAGATCGTCTCGGCCGT…
>Diel3S_1000h_metaT_9179.3.124622.AGTCAA.anqtp.hR_trimmed_contig_314020_trimmed	Lake Erie Diel 2014	5.12e-12	30.89	47.86	TGTGATTCCTAATTAGTTTAATAATTATTGTTTTGCAAAAATATCAAATCGGATTCCTGATAATCTTTCTATTATTGTGCCAGCAATCCCAAAATTAGTGTTACAATAAGTGAAATAAGTTCCAGGGGCATGATTTAAAAAATTTTGAGTATCATAATATGATCCTGATTCGGTTAAAAGCCATTATATTTCGGGAGGGGGGTTTAAATTTCCTGTATCGCTCAAAAATTGGTCGTATTTCGGTCCATCTCTTAGACTTGAAGTGTGCGACAAAATTTGGCGAGTAGTTATAGGAATATTTGGAAATTGAGGATTTCTGACAGTAAAGCCTAAATATTGACTAATATCTGCATCTAAATTTAA
>Diel3S_1000h_metaT_9179.3.124622.AGTCAA.anqtp.hR_trimmed_contig_332211_trimmed	Lake Erie Diel 2014	1.05e-19	36.73	52	GGTGAGGCCGAGCGGTGCCAGCAGCTGCTCGCGCACCAACTGGTGGAACGACCGCCCGCCGGCAGCTTCGGCCACCAGCCCCGCCAGCTGGTAGTTGGAGTTCGAGTAGCTCCACCCCTCGCCCCGCGCGAACCGTGGGGGGCGCAGCAGAGCCAGCGCCCGCTGGGGCGTCCAGCGGGCGGAGACATCCGCGAGGATCGAGTCCCGATACCCGGGCGCGTTCGTCACGTCGAACACGCCGCTCGAATGATTGAGCAACTGGCGCACCGTGATGGCCGGGTCCACGTGCGGAATCGGCGCGAGCCAACGGCTGACGGGATCGTCGAGGGAAAGTCGCCCCTGCTCGGCCAGGCGCACGAGCAGCGCCGCCGTGAGACTCTTGCTGACGCTGCCGATCCC…
>Diel3S_1000h_metaT_9179.3.124622.AGTCAA.anqtp.hR_trimmed_contig_360836_trimmed	Lake Erie Diel 2014	3.38e-09	35.05	55.79	CGAGGGGACGAGGCCCCCCTCGCGAGTGGGGGAGTAGAGCCGGGCGAACCGCCCTTTCTTCTCCGCCGGCACGGTGAAACCGGTGTCGGTCATCGCGAGAGGCTCGAAGATCCGCTCTTGCAGGAACTGCTCGAAGGATTTCCCGGAGAGGACCTCGACCAGGCGTCCAAGGACATCGACCGAGACGCTGTAGTGCCAGCGCGTCCCTGGTTCGTGCAGCAGGGGGAGCCTGGCGAGTTCCCGGACAAAGTCCGCGAGGTTGATCTGGCTGAGGACTCTCGCTTCACGATAGCCCCGATCGACCAGCGTGTCCCCAAAGACACCGTAGGTCAGCCCGGCGGTGTGGCGAAG
>Diel3S_1000h_metaT_9179.3.124622.AGTCAA.anqtp.hR_trimmed_contig_37552_trimmed	Lake Erie Diel 2014	1.14e-07	25.53	46.1	CGTGCTGGCCATGCCGCTGGGGAGCAGAATCCGCTGGCTGAGCAACTGGGCGTAGGGCACACCGGAGGCCGCCTCGGCGACTCGTCCGGAGACGTGCATCGAGACGCCGCCATAGCAGAAGTCAGTACCCGGGAGAACGCTCACCAGTCCCTGGCCGGGAACGAAGACACGACGGAGTCCCACGCCGGCGATCTGCTGCACGGCCTGCGCCAGGCTGAGCGTGTCGCTGCTGATCGCGGGGTTGTTGGCGGGCAGACCGGAGGTATGCGACACGCACTGGCGCACGGTGATCTGGGCTAGGTTGCCGCTGCGGAATTCGGGGATGAATGCGCCAACGGTGCTGTCGAGCGTCAGCAGGCCGTCGTCCTGCAGGGCCAGCAGCAGGGCCGATGTCGGGGT…
>Diel3S_1000h_metaT_9179.3.124622.AGTCAA.anqtp.hR_trimmed_contig_3826_trimmed	Lake Erie Diel 2014	6.02e-11	30.37	46.67	CATTCCGAGCTTTTGCGACAGCTGTTGGTTGTAGTACTGCTGGAAGGTCCTGTTTGTGGCTTTCTCGATCATATCCTGCAGTAGCAGGTAACAGGCATTGTGGTAGTCCCAGATCGTTCCGGGTACGGCACGATATCGAAGGCACTCCGGCGTCTTGCAGTTGTCATTGCCGCGGTCGAATCCGATTCCCGTCGTCATCGTCAGGTGATGACGCACGGTGATTGCATCCTCTTGCTGTGGTGTACAGGATGACCAGCTCCTCCCGAGATAGGTGGCGCTGGTCTTGGAGATGTCCATCTGTTTTTGGTGCTGCGCGATACCGACCAGCGCGGCCGTCACGGTCTTCCCGGCAGAGGCCCAGTACCAGAGACTATCTTTTGTGAATGATCCGAAGTACTG…
>Diel3S_1000h_metaT_9179.3.124622.AGTCAA.anqtp.hR_trimmed_contig_40586_trimmed	Lake Erie Diel 2014	1.65e-08	33.64	50.47	GTCGTCCATGCCGAGCGGGCCGAAGATGCGTTCACGGAAGAATTCGTCGAGCGGTTGGCCGGAGATGATCTCGACGATCGCGCCGAGGGTGTCGATGGAGTGGCTGTAGCGCCATTCCGTGCCCGGAGAGAAGGCAAGCGGAAGCTGGCCGATCTGGCGGGCCATATCCTGCAGCGTGTCTTTCGGGTGGCCGACCTTGCTGTTGCGGTAGATTTCGTCGGTCTCGTCCTGGAACAGGAAGCCGTAAGTCAGGCCGGACGTGTGCGTGACCAGATCAAGCACCGTCATCTCGCGGTCCGGTTTGCGCAGCTTCGG
>Diel3S_1000h_metaT_9179.3.124622.AGTCAA.anqtp.hR_trimmed_contig_43190_trimmed	Lake Erie Diel 2014	1.37e-05	29.73	39.86	ATGGGTGGCGCCGTACCAGTAACGCGCCTTCGGCGGCGCCAGCACACCCGGTTTGCTCTGGCTGTCATGAATCCGCAGCACCGCCTCGGCCAGCGTGATGCTGGTCGCGGTGGCTTCGTCCACGTCGCCCTCCAGGCCGCTGGTGAACGACAGCAGGTCCGAAAGCGTGATTTGGCCTATCGGCCCGCTCCACGGTGCGCCCTTGCGGTCGACCAGCAGATCGCCCGTGCGGGTCGCCAGCGTCAGGGTGCCTTGCTGCACCAGCCGCAGGATGGTCGATCCGGTGACCCATTTGGTGGCCGAGGCGATGGGATTGCGCGTCTGCGCCGTGTAGCCGCCCGAGCTTCGCGAATAGACCACGCCAGCGGGTATTGCCACTTCGACCGTCAGGCC
>Diel3S_1000h_metaT_9179.3.124622.AGTCAA.anqtp.hR_trimmed_contig_92345_trimmed	Lake Erie Diel 2014	5.52e-15	26.18	43.75	AAGTCCGCCATTGGAGACCGTGATGCCGGTATCGGGATCGAACGGTGCCGGGGTCAGCTGACCGTCACGCAGATAGTAGCCGGCCGCCCGATCCTTGAGCAGGTGGGGCGGAGTGCGATCGAAGTAACTCCGGTGCATCTCGAGTGGCTTGAAGATATTCTTGTCGATGTAGACCTCAAAATCCTCGCCACTGACAATCTCGATCACCCGGCCAAGAAAGATGACACCAGGGTTAGAGTAACTGAACCGGCTCCCGGGCTTGAACTCAATCTCGGTGTAGGGCAGCATCGCGACGATCTGTGACCATTCACGCGGCTCGAATGGGTGCCAGGGCTTGTCTCCAACCCACGGCCAGGTCGGGCTCCGGAGCCCCGCGCTGTGCGACAGCAGATGCTTTAA…
>Diel3S_1000h_metaT_9179.3.124622.AGTCAA.anqtp.hR_trimmed_contig_97491_trimmed	Lake Erie Diel 2014	1.23e-30	40.12	54.22	GGCGTCGCCGGTGAACAGCGTGCCGCGCAGGCCGGCGGGGGTGAAGATGGCTTGCGTGCAGTAGACGGGGTAGTCCTGTCCGCTGGCGCGGGTGATGATCTCGGCGAGCAGCGCGTAGCCCTGATTCCAGTACTCGAATCGCGTGCCGGGGGTGTGGCGCGGGCCGCCTTCGAGGAACAGCGGGAGCACGGCGGCAAGGTCGCTGCCGGCACCCTGGGAGTTGCCGCCGGGGATGCCGGAGGTGTGGTGCAGCAGGTGGGCGATCGTGATCGATGCGCTCTCCTCGGGCACGCCGGGCAGGTGCCTGGCGATCGGGTCATCGATGTTCAGCTTGCCGTCCTGCTGCAATCGCAGGATGGCCGCGGCGGTGAACTGCTTGCTAAGCGAGGCGATTTCCAA…
>Diel4S_1600h_metaT_9422.1.132642.GTTTCG.anqtp.hR_trimmed_contig_102918_trimmed	Lake Erie Diel 2014	5.42e-20	43.62	53.19	CTCGCCATGCACCGCGAAGCCATGCTGCGCCTTCACCCAGGGCCCCACGCCATCGGCGGGGTTGGCGGGCAGGTATCCGGTCGCCAGCCCCGGCACCAGCTCCGTGGTCGATTCCACCATCCGCGTCATGCTCATGCCCGCCGGCGCAAACAGCCGCTCGGCCAGGAAATCCCGCAGCTTCATCCCGCTCGCCCGCTCGGCGATCACCCCCAGCAGCATGAAGCCGGCATTCGAATACAGATACCGGCTGCCGGGCGCGAAGTTCAGCGTCCGCTGCCGCGCGATCCCGGCCAGCAGCTGCTCATGGCTCGCCGGCATGCCTAGGTCGGTGCCGCCGGTGCGCATGATCTCCAG
>Diel4S_1600h_metaT_9422.1.132642.GTTTCG.anqtp.hR_trimmed_contig_120749_trimmed	Lake Erie Diel 2014	1.97e-33	37.24	54.48	GAAATCTTTCCCGCCTACTTTGGCGATAAGGTTGCCAAGCAGCATATAGCCCGTGTTGCAATATGCATAACGGGAACCCGGCGGGAAATTAAGTGCGCTGCTATGCAATACCAGATCAACGGCATCCCGCTGATGGATCCCATCACCTTGTTGCCAGCCACATAATGCCAGTACATCGTATATCTCGCGAAGGCCACTGATATGGTGCATGAGCTGCCTTATCGTGACCTTACTGCCAAAATCCGGGATATCTGGGAAATACAGGCGAATATCATCGTCTAAGTCCAATTTACCCTGCTAGTCGAGCAATACAATACCCATACAGGTCAACTGCTTGGCCACCGAGCCAATATCCGAGACGGTCTCTGGCGTAAAAACCGTACGCGTTTCTAAATTAGC…
>Diel4S_1600h_metaT_9422.1.132642.GTTTCG.anqtp.hR_trimmed_contig_130955_trimmed	Lake Erie Diel 2014	2.04e-16	31.91	46.28	CGTGTCTTTCATCCCAACGGGGCGAAAGACTAATTGCTTCAACAATCGATCGAGGGGTTGGCCGCTGGCAACTTCCAGTACCCGGGCCAGTACGTCCGTACTGTTCCCATAGCTAAAACGGTCACCAGGCTGGTGCATTAACGGAATTTTAGCCAGGGCGCGTACTTCTTCTTCCAGGGTTCTGAATCCTGCCCCAAGCCCAAATCCAATCCCCGCCTCCCGATAGTAAGCGGCATATTGTGGATATTCGTCAGGAGACGAGATACCCGAAGTGTGGGTAAGCAAATGACGTACCGTAATCGGCCTATCCAGTGTACCCAGGGTGTCTTTGCCCGACAGCCCTCTGAAAAGCACCCGCATATCTGCATATTCAGGCAAATATCGCTGTAATGGATCGTC…
>Diel4S_1600h_metaT_9422.1.132642.GTTTCG.anqtp.hR_trimmed_contig_168551_trimmed	Lake Erie Diel 2014	1.3e-12	33.33	47.17	GACGGGTTCGAAGACCAGCTTGCGCATCCACCAGCCGTGGTCGTGCCCGCCGGGGCGGATGGCATCGACCACCATGCTAAGGAGCAGCGTATTGGTATTGGAATACACTGCACGGCTGCGGGGTACGAAATCGGCAGGTAAGTCGTATACGAATTTCAACAGGTCTTCGGCGCTGCGTTTTCCGTCCGGCCGGTTCAGCACGTCGAGGTAATAGGTGCTTTGCGCGATGAGGTCGGGAATACCGGTGCGGTGCATGAGCAAATCGCGGAGGCTGACCAGTTCGAGATTGGCTACCCTCTTGCGTTGATCGGCAGTGAAATACGCAGCGACTGGAGCCTCGAGGTCAAGCAGTCCCTGTTCGGCCAGACGGAATACCGATGTGGCCAGGAAGGGTTTCGT…
>Diel4S_1600h_metaT_9422.1.132642.GTTTCG.anqtp.hR_trimmed_contig_175875_trimmed	Lake Erie Diel 2014	1.43e-06	27.64	44.72	GAAGACCGCGAGATCGGTGGCGGTGCTGAAGAGGCCGGCGTGGCCGGCGACGCCGCCCAGTGCCCAGGCGTTCTCGTCGTGCACCTCGCCGCGCAGCGGATAGCCACGCGGGGGGGCCACTTCCGTCGGTGCCGTGCGAGCCACCTCGTCAGGGTCCACGCCGAAGCGCGTATCACGCATCCCCAGCCGGTGGAACACCTCGTCCTGGAGAAAGAGCTGCAGGGGGCGATCGGCCACCGCCTCCACGATGAACCCCAGCAGGTCGGCGCCCAGATCGGAGTAGGTGTAACAGGTGCCCGGGGGACACTGGATCGGCGACCGGAGGACGGCTTCACGAGCCTGGGCCGGCGTGCT
>Diel4S_1600h_metaT_9422.1.132642.GTTTCG.anqtp.hR_trimmed_contig_18671_trimmed	Lake Erie Diel 2014	2.08e-23	26.39	43.4	ATTGTAAAGAAAGATTACGGCATGATCCCGATCGGGGACAAATAAAAACGTACTTCTGTACCCTTTTGCCGAGCCATTTTTTGAAACAACTTCCACTCCCCCCAAATAGTTAATCATCCAGCCTGGAGAGCCAGGAAGGTTCGGTTGGGTAGGCTCCAACATCTGGCGGTAACTGGCAGGACTGAGGAGTTTATTCTTGCGGATGGCATTGTAGAATTTGAGCAGGTCACCAAGAGTTGACTGCATGAATCCTGAAGGGATGTTGTAAAGTCCGCCAGGTGGCATTACTTGGTCAACGGGCAGTAATTGCCCATTTCTATCAGCATTTATGTATCCAGTCGCTGTATTGGCATCTCTAAGTCCAAATCCTGTGCGGGTCATACCCAGCGGCAAGAATAT…
>Diel4S_1600h_metaT_9422.1.132642.GTTTCG.anqtp.hR_trimmed_contig_208896_trimmed	Lake Erie Diel 2014	2.57e-16	33.88	52.89	GTATCGTTCGCCCGGCTCGAAATCGAAGGGCGCGCGGCTGAGCCAGCCGAACACCTGCTCACGGGTGACATCCCGAGGTCGATCCGCCATCAACGGCTGGATCGTGGTCATGTTGCGGATCCCGGAGCTATGGTCCAGCAACTGCCGGATGGTGATCACGCGTCCCCCGGTGTCGTAGTCGGGGAGGTGCTTGCGGAGGTCGTCCTCCAGCCGCAGCTCGCCGCGCTCGACGAACCGGAGGATGGCTGCCGCGGTGAACTGTTTGGTGACCGAGCCGATGCGGTAGACCGTCTGCGGCGTCGCCGGCACGTCGAGTTCGAGGCTCGCCTTGCCGTAGCCCGCGGCATGGACGAGCTTATCGTCGCGCAGCACCGCGATCGAGAG
>Diel4S_1600h_metaT_9422.1.132642.GTTTCG.anqtp.hR_trimmed_contig_225814_trimmed	Lake Erie Diel 2014	8.29e-07	31.34	44.78	GATGCGTCCCAACAGCTGGTAGTTGGTGTCGGAGTATTCGGCCCGACCCGCCTGCCCGGGCCTGAATGCAGGGCGCATGCCACGCGCACGCTCCAGAACATCCTCTAGCGTCCACGATCTGTCGCTGCCGGCAAACAGCTCATCCTGCAGGCTCCTACCATGTACCTTTCGCTGGAAGTAATCCGGAAGTCCGCTCGTGTGCGACATCAGCTGCCGGATCGTCAGCGAAGGGGCTTGCTGCACCCCATCGATGATCAGCAGTTCCAGCAGCAGTCCAGCACCGAGATACTGACCGATCGGATCATCAAATCCAAGACGTCCCTCGTGTCGGAGCTGACGCAACAGGGCCGTGATCATGAGCTTCGTTGTGCTGGCAATGAAGAACTGAGATCCTGGCTC…
>Diel4S_1600h_metaT_9422.1.132642.GTTTCG.anqtp.hR_trimmed_contig_241043_trimmed	Lake Erie Diel 2014	2.59e-07	25.93	42.59	GTCGACCCCCCTAATGAGAGGCTGGTAGGCCTCCTCGGTGGCGCAGCTGGGCTGGTCGCCGCAGGCAGCGCCGTAGGAGAGGCCGGCTGAGTGCGTCAGGAGATGTTTGACGGTTATGGGGCTCCTGGGCGCCTCCGACTGGGGAGAGGACACCAGGGTGTCGGTCGGGACGACCTGGAGCGAGGCGAAGGCCGGCAGGAACTTGGTCAATGGGTCCTCCAGCGAGATGAGGCCATCCTCCACGAGGCCCATCAGACCGCACACCGTCACCGTCTTCGTCATGGAGTAGAGCCGGCAGATGGTGTCGAATCGCCAGGGCCGCTTCGACTCTGCGTCGGTCACGCCGAAGGCGTTCGCCTTGACGAGCTTCCCGTCCTTGAGCACGACATAGGCGAGTCC…
>Diel4S_1600h_metaT_9422.1.132642.GTTTCG.anqtp.hR_trimmed_contig_246692_trimmed	Lake Erie Diel 2014	2.47e-18	28.19	45.5	CAGATAGTAGCCGGCCGCCCGATCCCTGAGCAGGTGGGGCGGAGTGCGATCGAAGTAACTCCGGTGCATCTCGAGTGGCTTGAAGATATTCTTGTCGATGTAGACCTCAAAATCCTCGCCACTGACAATCTCGATCACCCGGCCAAGAAAGATGACACCAGGGTTAGAGTAACTGAACCGGCTCCCGGGCTTGAACTCAATCTCGGTGTAGGGCAGCATCGCGACGATCTGTGACCATTCACGCGGCTCGAATGGGTGCCAGGGCTTGTCTCCACCCCACGGCCAGGTCGGGTTCCGGAGCCCCGCGCTGTGCGACAGCAGATGCTTTAACCGCACTTCACCCATCGAACCATGTGGATTATGAATCCGGTTCAGTTCAGGCAGATACTTGATGATCGG…
>Diel4S_1600h_metaT_9422.1.132642.GTTTCG.anqtp.hR_trimmed_contig_262373_trimmed	Lake Erie Diel 2014	3.45e-30	37.21	50.7	CCAGCGGTAGAGGTCCCGCACGCTGGCGACCACGCCGCCCATGCCCCGGTACTGGAAGCCGTACGCGCCGTAGGGGTGATCGAGCGCAGAGCGGCTCGGGCCTCGGGCCGAGCGGCCGATGGCGACCACGGCGCCCGCGGGCGCGGCGTCGCCGGTGAACAGCGTGCCGCGCAGGCCGGCGGGGGTGAAGATGGCTTGCGTGCAGTAGACGGGGTAGTCCTGTCCGCTGGCGCGGGTGATGATCTCGGCGAGCAGCGCGTAGCCCTGATTCCAGTACTCGAATCGCGTGCCGGGGGTGTGGCGCGGGCCGCCTTCGAGGAACAGCGGGAGCACGGCGGCAAGGTCGCTGCCGGCACCCTGGGAGTTGCCGCCGGGGATGCCGGAGGTGTGGTGCAGCAG…
>Diel4S_1600h_metaT_9422.1.132642.GTTTCG.anqtp.hR_trimmed_contig_268172_trimmed	Lake Erie Diel 2014	2.08e-19	33.33	47.37	CCGATGGACACCGCGATGCGGCTGGGGATCGGCAGCGTCAGCAAGAGTCTCACGGCGGCGCTGCTCGTGCGCCTGGCCGAGCAGGGGCGACTTTCCCTCGACGATCCCGTCAGCCGTTGGCTCGCGCCGATTCCGCACGTGGACCCGGCCATCACGGTGCGCCAGTTGCTCAATCATTCGAGCGGCGTGTTCGACGTGACGAACGCGCCCGGGTATCGGGACTCGATCCTCGCGGATGTCTCCGCCCGCTGGACGCCCCAGCGGGCGCTGGCTCTGCTGCGCCCCCCACTGTTCGCGCGGGGCGAGGGGTGGAGCTACTCGAACTCCAACTACCAGCTGGCGGGGCTGGTGGCCGAAGCTGCCGGCGGGCGGTCGTTCCACCAGTTGGTGCGCGAGCAG…
>Diel4S_1600h_metaT_9422.1.132642.GTTTCG.anqtp.hR_trimmed_contig_275000_trimmed	Lake Erie Diel 2014	7.25e-11	46.15	55.77	CGGCACCAGGGGCGGGGTGTCGAGGATATGCTGAACCACCCGGGCCGTGGCGAGGAAGTTGTCCTGATTGGTGGTCATGCCGGAGACCGCCATCTTCGCCTGCGGATCATAGGCCACGATCGTGCCCCAGAAGCCGCTGTGCCAGTAGATGTCGCGGCCATCGGCCGTGGAGATGACGAACACGCCCAGCCGATAGTGGTCGGCTCGTTGATGGGGCCCCCTCCGGAGCATCTCCGCCAGGGTCTCGGGTCGGTCGAACACCCGCCTCTCGAAAAGCGCGGCGAAGAAGATCGCGAGATCGCGCGCCGACATCACCAGGCCGCCGCCGCCATAGAGGTCGGCCGACGCGTGAACACCCGTCGCGTCGAAGTCCCCCAGGGCCTGCGGAGCCCGATCCGG…
>Diel4S_1600h_metaT_9422.1.132642.GTTTCG.anqtp.hR_trimmed_contig_299206_trimmed	Lake Erie Diel 2014	1.3e-14	34	52	GATCAACTCGAACGCTTGAGCCCTGGTGACAAGGTCGTCTTCGCTGCGTCCGAGCTGCACACGCCAAAGGTAAAGGTAGTCATCCACGCCACTGGTATGGCGCAGCAAGTGACCCAGGCGGACGGGGCACTGCGCGCCCGCCAGTGCGGGAAGCCGGTCGCGCATATCGGCATCAAGCGTGATTCGGCCAGCAGCGACCGCTTGCATCACCAGGGCTGCAACCCAGAACTTGGTCTCCGAGGCCAGATAGAAGCGAGTATTTCCGGCCAGCGCTTGCTGCCACTCTAGATGACCTAGGCCATGATGCTCGGCGCGAACAACCTGCCCCTCGACGGCAAGGCCGGCACAGAATCCGGG
>Diel4S_1600h_metaT_9422.1.132642.GTTTCG.anqtp.hR_trimmed_contig_311377_trimmed	Lake Erie Diel 2014	5.11e-11	30.89	50.41	GTTGAGGATAGTCCCGTTGTTGTACAGGTCGAAGTAGCCTTGGGCTGTTTCGGCGGGCAGATTGTCGTGCGGGTAGTAGTAGGTGTCCGCCAACCCGAGCGGTTCCAGCACCTTGGCGCGCAGCGCAGCGCTGTGGTCGCCGCCGGTAACTTGATCCAGTACCATAGCCAGCAGGAGGTAATTGGTGTTGGAGTATTCGACATCTGTACCGACGGGAAACAGCGGATCGTCGTGATAGACGAATTTGATGAGTTCGTCCGGTTTCCACTTGTGCGGCGGATCGTTCAGCACAGCGAGGTAAAAGTCGTTGTCTTCAATCACGTCGGCGATCCCGGTGGTATGATCGAGCAGCCGCCGAATGGTACTTCCCCGGACATTTTTCACCTTTTCGACGACTTC…
>Diel4S_1600h_metaT_9422.1.132642.GTTTCG.anqtp.hR_trimmed_contig_314652_trimmed	Lake Erie Diel 2014	1.66e-15	34.71	52.89	CGGCTCTCGCTCGATGATCGCGTCACCCGCTACCTCCCCGAACTTCGGCGCGTGCACGATCCGTTCGGGATGATTGACAGCATCACCATCCGGATGCTGCTCTCCCATTCGGCCGGATTCCGCAACGGGACCTGGCCGTACGCGCGCGGACTGCCGTGGGAACCCTTCGAGCCCACCAGCTGGGAGCAGCTGGTGGCCATGATGCCATATCAGGAGCTGCTCTTCCGCCCCGGGAGTCGCTACGGGTACTCCAATCCGGCATATGTGTATCTGGCCCGGATCATCGAGCAGCTCACCGGCGATCCGTGGGATGCCTACATCCACAAGAATCTCTTCACGCCACTCGGGCTTACCACCAGC
>Diel4S_1600h_metaT_9422.1.132642.GTTTCG.anqtp.hR_trimmed_contig_323098_trimmed	Lake Erie Diel 2014	1.36e-05	29.09	42.73	GGCGGGATGCCAGATCTTCTCCTGCAGGTATTGGGCGAGTGGCTTGCCCACCGCCGACGACACGAGCACGCCGACGAGGTTGGTTTCGCCGGTGTTGTAGTGCCACACCGTGCCCGCGGAATGTGCGCGCTGCAGCGTACGCATGTAGCTCACCGTGGCGTCCACACCCTCGTCGGGTGTCGCGTTGTTGAACCAAGCGACGTCAGCGGTCGGGTCCTCGTAATCCTCGTTCCACCGCGCGCCCGAGCTCATCGTGAGCAGATGGCGAATCGTGACGCCGTCGTACACCGAGCCGCGGAGGTCAGGGATGTAGTGGCTGACCGT
>Diel4S_1600h_metaT_9422.1.132642.GTTTCG.anqtp.hR_trimmed_contig_330481_trimmed	Lake Erie Diel 2014	4.37e-17	31.05	43.68	GGCCTTCTCAAAGGCCAGGAGGTCATCAAGGCTCGTGACGATGCCCCCGCAGCCGCGGTAGCCCCAGGCCCACGGATGATCGACCTGCGTATGCCCGGGAATTCGGCTCGCCGCACGCGGGCGGAGGCGATCATCGCCGAGGAAGCCGGTGCTCTTCATGCCAGCGGGGTCGAAAATGCTCGACTTGATCCGCTGCTCAAAGGGCTGGCCGCTGACCTCCTCGATGATCGCCGCCAGAACGATGTAGGCGTGGTTGTTGTACGAGAAGCGCTCGCCCGGCGGCGCGATCGACGCCGAGTCCATGAAGTCGCGCACGACCTGATCGCGGTCCTCGGCCAGATACGGCGGCATCTTGCTGTCGTTGTCGCGTCCGGATGTGTGCGAGAGCAGGTGGCGGAT…
>Diel4S_1600h_metaT_9422.1.132642.GTTTCG.anqtp.hR_trimmed_contig_34216_trimmed	Lake Erie Diel 2014	1e-09	31.91	46.81	CGGGAAATCCAGATACTTGCTCACAATTGCCCCTAAGAGAATATATCCCAAATCGGAATATTTAAACGCAGTTTTAGGAGGAGTATTCAACGGCTCCTTCAAAATGCATTGAACTGCGTTATCTAGACCGTTACCGAAGTCCGAGACTGGGCTGTCTGGCGCCAGACCGCTTGTATGCAGCAACAAATCTTGCACAGTGATATGCTCCTTGTCATTCACGACACCGAATAGATGGCCTAAAGTATGGTGAAGGGACAACTTTCCTTCTTGAACCAGATGCATGATGGATAGGCCCGTGGCAAAAGGCTTCGTGAGACTTGCCAGGTCAAATATGGTATCCAACGTCATGTTCTCAACCAGAGGCAAAACTGCACGATTTCCAAAGGCTTTGTGGTGGAC…
>Diel4S_1600h_metaT_9422.1.132642.GTTTCG.anqtp.hR_trimmed_contig_343249_trimmed	Lake Erie Diel 2014	2.98e-11	32.94	54.1	CGCAGTATGGGTGAGCAAATGACGGATCGTGATGGGCCTGGTGGCAGGCCGGGTTTCCAGGGTACTGGAGACGGAATCATAGCTTACCAGTACACTTGGATTGGCAAAATACGGGATGTACTTGGACAGTGGATCGTCGAGCAGGAGTTTGCCCTCTTCATTGAGCATGAGGATGGCTGTCGTAGTAATCGCTTTGGTCTGGCTGGCAATCCGGAAAAGATCGTCCCTTTCCAAGGGCATTTTCGTTTGCATATCCCTGAATCCGAATGCTTTGTAGTGGATAATCCTGCCCCGCTTGGCGATGAAGGTAGCAGCGTTGGG
>Diel4S_1600h_metaT_9422.1.132642.GTTTCG.anqtp.hR_trimmed_contig_359433_trimmed	Lake Erie Diel 2014	1.32e-13	33.78	58.11	AGGGAACTGCGGGACATAGCGGCGAACGTCCTGCCCAAGATCGACTTTCCCTTGCGCTACGAGCTGAACAAGCGCGAACGCCGTTAATGGCTTCGCTACGCTGCCGATCCGAAACTTTGTCCGAGCCGGATCAACTGCCACACGCTGCTCCACATCGGCAAAGCCAAAGCCGGTTGACCAGACTTGCTGTCCGTGAATCCCCACAGACGCCGATAGACCCGGCGTGCCACTTTGCCTAGCAAACTCGCTAACGATTCGATCCGCCTCTACTTTGAGATCGCTCGCCTGCACTTTGGGACAGCACGTTGCAAGCAGAACGAATGCGGCGCAATGCAGGAAAAG
>Diel4S_1600h_metaT_9422.1.132642.GTTTCG.anqtp.hR_trimmed_contig_370372_trimmed	Lake Erie Diel 2014	8.56e-12	35.45	52.73	CTCCATACCCAGTGGAGTCCACAGTTTTTCTTGCAGATAGTGTGTAACCGTTTTGTTTTGTAAAGCACGCTCAAGTATAAGTCCGAGTAACTGTGTGTTACCACTGGCGTAAGCAAATTTTTTACCGGGTTCTTCGGCCAATTTCATCTTCGCAATTTGCTTCCTTAAGTTTCTACCATAATAGAAAGAAGCGGCATCGCCAAAAGGATTGTAATAGCTTTCATTAAAATCTATTCCGGAAGTCATCTGCAACACGTGTTTGATGCTTACTTTATCAAATCCGTTTTTCTTTAATTCGGGAATATAGTTTGTAATGGGTTCATCTACTGATTGAATTAAACCATCATCTATGGCGCAACCTATCAAAATAGAAGTTACCGATTTAGCCATTGA
>Diel4S_1600h_metaT_9422.1.132642.GTTTCG.anqtp.hR_trimmed_contig_406206_trimmed	Lake Erie Diel 2014	1e-05	36.36	46.59	ATTGGGAAACCAGAACAGGTTCGCACTGTAACCCAGGTCACGGCCGGTATGCCCAACACCGTAGTCTGCCTTGCGTGTAAATTTTTTGATCGCGCCGGCGCCGGTGTAGAAATCATCGTCTTCCTGCACCCAGTCCTGCAATTCAAGCATCGAAGCCGAATTGAGTAGATTCCGGTCGTCGAAGAGTGCTTTACTGAAGCGATACAAGTCAAATACATTGCTGAACACGCCACCATAACCATTGCCGCTGCCTGTGGTAAAATTGCTCACATTGCTCAGTCCGCCATTGCTGTGAAGGTCGAAATAACCTTGGGCGGTATGGTCGGGAAGTTCATCATGGCCTTGGTAAAAGGTGTTGTACATCTTCAGCGGGTTCCAGATCATCTCCTTCAAAAGTGA…
>Diel4S_1600h_metaT_9422.1.132642.GTTTCG.anqtp.hR_trimmed_contig_438057_trimmed	Lake Erie Diel 2014	2.41e-07	32.73	41.82	GACCTCGTCGCGCGCCTCGGGCTTGTCCTGCAGCACTGCGCGATACGTTGCGCTGTCGGCATGGAACAGCACGGGCGCGCGGTTGTACTGCTTGCCCACGTTCGCCATCTCGGGTCGCGTCGCGCAGGCCTCGACGCAGGCGGGCTCGCCCCCGCAGAGGTCGCATTTGAGCAGTTCGCCATCCGGCGCGACGAAGATCACGTCGAACGGGCAGCCCGGCACGCATTCCATGCACTGTATGCACTTGTCCTGCGCGATGACGGCGACCAGGGTCTTCGGGTCGTAGTAGAACGCGTCGGCCGG
>Diel4S_1600h_metaT_9422.1.132642.GTTTCG.anqtp.hR_trimmed_contig_445427_trimmed	Lake Erie Diel 2014	9.82e-13	37.84	49.55	GGTGACCCCGATGGGAGTGAGGAGCGCCTCGCGCACGAGCTGGTGCAGCGGTCGCCCGGCGGCAGCCTCGGCCACCAGCCCCGCCAGCTGGTAATTGGTGTTGGAGTAGCTCCACCCTGTCCCTCGCGCGAACAGCGGCGGGCGCAGCAGCCCGAGCACCCGTTGCGGGGTCCAGCGCGCGTTCACGTCGGCAAGGATGGAATCGCGGTAGCCGGGCGCGTTGGTGACATCGAACACGCCGCTGCTGTGATTGAGCAGCTGACGCACGGTGATGGCCGGATCGACATGCGGGATGCGCGGGAGCCA
>Diel4S_1600h_metaT_9422.1.132642.GTTTCG.anqtp.hR_trimmed_contig_52673_trimmed	Lake Erie Diel 2014	1.76e-18	28.65	48.75	CGTCCATGCACCACTGAATGCCGCATTGATCGGTACGTTCTGTCCGCTCTGCGGTCCCATCCAGCGAACAGCCACCTCGATCGGCAACGAATCTTCAACGCCCATATACGTGCTGTCGAGCTGCAGACCGCTGAGGATGTACTCCCTGTAAACGTTCCCGATGCTTTTGCCAGTGACCTTAGTAATGATCATACCTGCCAGCAGGTAATTCGTGTTGCAGTAGTTGAAGACTGTTCCGGGCTTGGCAAGGGGCTCCTTGATGAACTCAAGCAGGTCCTCCGGCTTGAAGATGCGGTTCGTGTTGGCAAGAACCGCCGACCGGTACTCGGTGGCGGACGAGTAATCTGCCAGGCCACTTCGATGGCCGAGCAACTGACGCACGGTTATTGACGCATCGAT…
>Diel4S_1600h_metaT_9422.1.132642.GTTTCG.anqtp.hR_trimmed_contig_60880_trimmed	Lake Erie Diel 2014	6.06e-09	31.76	43.24	GCCGAGCGGCACGCGCAGTGCGGCGTCGAAGATCTGCTGCCAGGACTTTCCTGTTGCCACCTCCGCCATGCGACCGGCCACGCGCAGATGGGTGGCGCCGTACCAGTAACGCGCCTTCGGCGGCGCCAGCACACCCGGTTTGCTCTGGCTGTCATGAATCCGCAGCACCGCCTCGGCCAGCGTGATGCTGGTCGCGGTGGCTTCGTCCACGTCGCCCTCCAGGCCGCTGGTGAACGACAGCAGGTCAGAAAGCGTGATTTGGCCTATCGGCCCGCTCCACGGTGCGCCGTTGCGGTCGACCAGCAGATCGCCCGTGCGGGTCGCCAGCGTCAGGGTGCCTTGCTGCACCAGCCGCAGGATGGTCGATCCGGTGACCCATTTGGTGGCCGAGGCGATGGG…
>Diel4S_1600h_metaT_9422.1.132642.GTTTCG.anqtp.hR_trimmed_contig_61612_trimmed	Lake Erie Diel 2014	2.25e-11	25.68	41.94	GCTGCTTTGCAAGTTTAACGGCTCGAAAATATTTCTCTTCAGATAATCCTGGTACTTCAAGCCACTTAACTTTTCGATCATATAAGTTGCAAGAATAAAGCTAGGATTTGAATAGGAGAAGTTGGTCCCCGGAGTGAATATTAGCGGATCGTTGATGAATAGTCCAACGTAAACTCCTACAGTGCCCAAATATTCCCCAGTATAGACTTCATAATCCTTTAGTTCATCATCACCTATACCCGAAGACATGGAGAGCAGTTGCTCGTATGTTACATCAATGCATGTTCCGTTTGGCATGTCTTGAAGTTGAGGACACCACGAAGTTTGGTTAGGAAATCCAAACTTGACAAAATCATCTTGTGTAAGGTCATCGTTAATAGGCTGTGATAAGTTAACTTT…
>Diel4S_1600h_metaT_9422.1.132642.GTTTCG.anqtp.hR_trimmed_contig_63779_trimmed	Lake Erie Diel 2014	1.39e-09	27.38	48.81	GAGACCAGACAAATCGGTCAGCACAGATTTGATGCTGATGTCGTCACCTGTGAAGGGGTTGACGATGTTCAAGCCAGGCAACAAATTCTTCAGGGCTTGTTCCAAACGAAGCTGTCCCTTATCCCTTTGCTGGTAGGTCAATATGGCGGTGAAAAGACGAGTCAAACCACCGATACGGAAGAGGGTCTTGGAGGTGACGGGGTTGTTATTAACTCCAGTACTTCCAAAGGTGCCGTTGTAAATCACTCTTTGGTTGTAGGCAATACCGATGGCTACTCCAGGGATGCTCAAGTCGGACCTGAGGCGAGTCCAGGTGCGTTCCAAAGTCCT
>Diel4S_1600h_metaT_9422.1.132642.GTTTCG.anqtp.hR_trimmed_contig_64690_trimmed	Lake Erie Diel 2014	6.02e-11	30.37	46.67	GGCAAGATCGCCCTTGAGCAGTACTTCGGATCATTCACAAAAGATAGTCTCTGGTACTGGGCCTCTGCCGGGAAGACCGTGACGGCCGCGCTGGTCGGTATCGCGCAGCACCAAAAACAGATGGACATCTCCAAGACCAGCGCCACCTATCTCGGGAGGAGCTGGTCATCCTGTACACCACAGCAAGAGGATGCAATCACCGTGCGTCATCACCTGACGATGACGACGGGAATCGGATTCGACCGCGGCAATGACAACTGCAAGACGCCGGAGTGCCTTCGATATCGTGCCGTACCCGGAACGATCTGGGACTACCACAATGCCTGTTACCTGCTACTGCAGGATATGATCGAGAAAGCCACAAACAGGACCTTCCAGCAGTACTACAACCAACAGCTG…
>Diel4S_1600h_metaT_9422.1.132642.GTTTCG.anqtp.hR_trimmed_contig_68580_trimmed	Lake Erie Diel 2014	4.85e-24	50.6	63.86	CAAGCCTGAGGAGTGGTTGAGCAAATGGAAAATACGTACCTGACGCGCAATTTCAGGCTTTTTAAAATCGGGAAAATACATCGCCAGGGAGTCGTCGAGCCGCAGCCGCCCTTCCTGTTCCAACATCAGGATGCCATTGGCCACAAAGGTTTTGCTGATCGAACCCGTATTGAACGCCGTATTCGGGGTGATGGGGGTTCTATTTTCCAGGTCGGCCAATCCATATCCGCGCTCGAACACTACTTTTCCATCCTGCATGACGAGTACGGCGGCACCCGGCCCGCCAGACTCAAATTCTGCCGTGAAATAGCCGTCCAAACGCTCCTGTAGGGTGGG
>Diel4S_1600h_metaT_9422.1.132642.GTTTCG.anqtp.hR_trimmed_contig_98202_trimmed	Lake Erie Diel 2014	1.05e-07	40.48	57.14	GGTCATGCCCGTCGGAACCTTCAGCCGGCTCGTGGTGAACTGGTTGTAAGTGACCCCAACGGCGTTCTCGACAATCTTCTCCATCAGGGTATAGGGCGCGTTGTGATAGGCCCAGCGCGTTCCGGGTGCTGCCTTATAGGTAAGGCAGGAAGGCAGGGTGCAATCGTCGTCGGCTACAGCATCGTCGAGTCCGGTGCTCATGGTAAGGTGATGGCGCACGTTGATAGCGGCTTCCTGAGTGGCGGTCAGGGAAGACCAGCCTTTGCCGAGGTAACGCGCACTCGTGTCGGTGATGCGCAGCTTGCCTTCCTCCTGCGCCAGTCCGGCAAGAAAGGTCGTAAGTGTTTTGCCTGCCGAAGC
>Diel5S_2200h_metaT_9422.2.132645.CGTACG.anqtp.hR_trimmed_contig_121136_trimmed	Lake Erie Diel 2014	8.69e-13	31.61	49.06	GGTGTTTTGCAGTCCCAGGGGCCGGATGATTTCCAGTTCCAATTGTTCCGATAGTGCTTTGCCGCTGCGGATTTCAAGGATGCGTCCCAGCAGCTGGAAATTGGTGTCGGAATAATGGGCACGCTTTGCGGTTCCGGGCGGGAAATGCGCTGCGATGCGGCGGCTCTGTTCCACGGCCGCTTCCGTAGTCCACAGAAAATCTTCTCCCGCCAGCAACCTGCTTTGCCATGCCACACCGTCTTTGGGCGCATCGCCGAAATAATCCGGCAAGCCACTGGTATGGGCCAGCAGGTGGCGGATGGTGATTCCGGCGCTGTAGTCTTTCCCCTTGAACACATGGATTTTGCTCCAGAGCGTTTCCGGCAGAAGGGAGGCGATGGGCGTTTCAAGGCTCAGCTT…
>Diel5S_2200h_metaT_9422.2.132645.CGTACG.anqtp.hR_trimmed_contig_126764_trimmed	Lake Erie Diel 2014	1.45e-06	24.76	44.16	GAGAAGTTGGCGGATGGTTACGTTTTGGCTGTTGAAGGGGTTGCCGATGCTGAAGGTGGGGAGAAGGTTGACCAGGGGAGTATCGAGGGAGAGGGATCCTTTCTCTCTCAACGCGAAGGCGGCCAAAGTGGTGAACAACCTGGTCAAACCTCCAATCCTGAAGAGGGTATCGAAGGTAACGGGATCAGCGTCAGAGGTATTCTTTGATCCAAAGGCATTCTTGTAGATGACGTTTTTATCGTAGACGATACCAATGGTCATACCGGGGATGTCCAAATCCGTCATCAAATCCTGCCAGGTCCTCTCGAGGGTCTT
>Diel5S_2200h_metaT_9422.2.132645.CGTACG.anqtp.hR_trimmed_contig_14567_trimmed	Lake Erie Diel 2014	2.08e-23	26.39	43.4	ATTGTAAAGAAAGATTACGGCATGATCCCGATCGGGGACAAATAAAAACGTACTTCTGTACCCTTTTGCCGAGCCATTTTTTGAAACAACTTCCACTCCCCCCAAATAGTTAATCATCCAGCCTGGAGAGCCAGGAAGGTTCGGTTGGGTAGGCTCCAACATCTGGCGGTAACTGGCAGGACTGAGGAGTTTATTCTTGCGGATGGCATTGTAGAATTTGAGCAGGTCACCAAGAGTTGACTGCATGAATCCTGAAGGGATGTTGTAAAGTCCGCCAGGTGGCATTACTTGGTCAACGGGCAGTAATTGCCCATTTCTATCAGCATTTATGTATCCAGTCGCTGTATTGGCATCTCTAAGTCCAAATCCTGTGCGGGTCATACCCAGCGGCAAGAATAT…
>Diel5S_2200h_metaT_9422.2.132645.CGTACG.anqtp.hR_trimmed_contig_149134_trimmed	Lake Erie Diel 2014	5.57e-09	31.08	43.24	GCCGAGCGGCACGCGCAGTGCGGCGTCGAAGATCTGCTGCCAGGACTTTCCTGTTGCCACCTCCGCCATGCGACCGGCCACGCGCAGATGGGTGGCGCCGTACCAGTAACGCGCCTTCGGCGGCGCCAGCACACCCGGTTTGCTCTGGCTGTCATGAATCCGCAGCACCGCCTCGGCCAGCGTGATGCTGGTCGCGGTGGCTTCGTCCACGTCGCCCTCCAGGCCGCTGGTGAACGACAGCAGGTCCGAAAGCGTGATTTGGCCTATCGGCCCGCTCCACGGTGCGCCCTTGCGGTCGACCAGCAGATCGCCCGTGCGGGTCGCCAGCGTCAGGGTGCCTTGCTGCACCAGCCGCAGGATGGTCGATCCGGTGACCCATTTGGTGGCCGAGGCGATGGG…
>Diel5S_2200h_metaT_9422.2.132645.CGTACG.anqtp.hR_trimmed_contig_164675_trimmed	Lake Erie Diel 2014	6.16e-12	38.3	59.57	CGTCGACTCCATCCCCAGTGGTTTGAAGATATTCTCCTCCGCAAACTGATCGACCGGCTCTCCGCCAACCCGGCGGACCAGTTCGCCGAGCACGATATAACCAACATCCGAATAGATCATCCGCGAGCCCGGGGCGACCACCGGCGCCAGCCGCCAGATATTCTCGAGCGCTTTGGCCGGCCCCTGCTCGTAGTCACGAACCTCATTGTCGGCAATCAACCCGGCCCGGTGGGTCAGCAGCTGCTCGACGGTGATCGCCCGCTTCCCCATCTCCCCAAACTCCGGAATATAGCGGGAGACCGGATCTCCCAGCCTGACCAGTCCGTATCGACAAGGATCATGACCGAAGTGGCCGTGGCGACCACCTTCGTCAATGAGGCCAGATCGAAGATCGTCTCG…
>Diel5S_2200h_metaT_9422.2.132645.CGTACG.anqtp.hR_trimmed_contig_224764_trimmed	Lake Erie Diel 2014	3.11e-20	43.4	59.43	GTCGGTGCCGCCGGTGCGCATGATCTCCAGCATGTCGCGGATGCCGGAGCTGTTGCGCATCATGTGGTCGATCGTCACCGTCGCGCCGAAATCGGCAAGTTCCGGCACATGCAGCCGAACGTCGTCCTCCAGCGAAAGCCGGCCCTCCTGCGCCAGCAGCAGGATCGCCGCGCAGGTGAACTGCTTGCTGACGGAGGCGATGCGGAACGTCGTCTCCGCCCCGATCGCCACCCCCAGCTCGATGCTGGCCAAGCCGCCGCTTTCGTGCAGCACCAGTTCCTTGCCGCGCATCACCCCGATGGTCACCCCGGG
>Diel5S_2200h_metaT_9422.2.132645.CGTACG.anqtp.hR_trimmed_contig_233511_trimmed	Lake Erie Diel 2014	1.04e-26	40.69	54.48	GGGGTAGTCCTGTCCGCTGGCGCGGGTGATGATCTCGGCGAGCAGCGCGTAGCCCTGATTCCAGTACTCGAATCGCGTGCCGGGGGTGTGGCGCGGGCCGCCTTCGAGGAACAGCGGGAGCACGGCGGCAAGGTCGCTGCCGGCACCCTGGGAGTTGCCGCCGGGGATGCCGGAGGTGTGGTGCAGCAGGTGGGCGATCGTGATCGATGCGCTCTCCTCGGGCACGCCGGGCAGGTGCCTGGCGATCGGGTCATCGATGTTCAGCTTGCCGTCCTGCTGCAATCGCAGGATGGCCGCGGCGGTGAACTGCTTGCTCAGCGAGGCGATTTCCAACAGCGTCGCGGGGGTGTTGGGCACGGTGCCCGACTCATCCGCGAAGCCGACGCCGGTGGCGGCGAT…
>Diel5S_2200h_metaT_9422.2.132645.CGTACG.anqtp.hR_trimmed_contig_235133_trimmed	Lake Erie Diel 2014	5.88e-08	33.98	52.43	CGTGGACGCGGGCAGGTAAAACCAGGTATCCTTCATGCCCAGCGGCCCGAATATCCGCTTTTGGAAAAATATATCGAGACTCATTCCCGAAACCACCTCTACCAGATAGCCCAGGACATCGGTGTTCAGCCCATACGTCCAGCGCTCCCCAGGCTGGTGGAACAGCGGCAGGGATCCGAGCCGACCCATCACCTCGGATAACCGGTCTTCCGGCGTGGCTATACCGGACGGGATCCGATACTTCGCATAAATGGCTTTTGCCTCTGCTGAGCCTATCCCTGCGTAACCTATACCGGAAGTATGGGTGAGCAAATCCCGGATAGTAATCTCGCGGTTTGCAGGAACGGTCGTAAACGTGGTATCTTTGGCATTATATTGATCGATTACATTCGGTTTTTT…
>Diel5S_2200h_metaT_9422.2.132645.CGTACG.anqtp.hR_trimmed_contig_293190_trimmed	Lake Erie Diel 2014	1.39e-09	27.38	48.81	AGGACTTTGGAACGCACCTGGACTCGCCTCAGGTCCGACTTGAGCATCCCTGGAGTAGCCATCGGTATTGCCTACAACCAAAGAGTGATTTACAACGGCACCTTTGGAAGTACTGGAGTTAATAACAACCCCGTCACCTCCAAGACCCTCTTCCGTATCGGTGGCTTGACTCGTCTTTTCACCGCCATATTGACCTACCAGCAAAGGGATAAGGGACAGCTTCGTTTGGAACAAGCCCTGAAGAATTTGTTGCCTGGCTTGAACATCGTCAACCCCTTCACAGGTGACGACATCAGCATCAAATCTGTGCTGACCGATTTGTCTGGTCTT
>Diel5S_2200h_metaT_9422.2.132645.CGTACG.anqtp.hR_trimmed_contig_297349_trimmed	Lake Erie Diel 2014	2.09e-14	29.41	47.22	CGTCCATGCACCACTGAATGCCGCATTGATCGGTACGTTCTGTCCGCTCTGCGGTCCCATCCAGCGAACAGCCACCTCGATCGGCAACGAATCTTCAACGCCCATATACGTGCTGTCGAGCTGCAGACAGCTGAGGATGTACTCCCTGTAAACGTTCCCGATGCTTTTGCCAGTGACCTTAGTAATGATCATACCTGCCAGCAGGTAATTCGTGTTGCAGTAGTTGAAGACTGTTCCGGGCTTGGCAAGGGGCTCCTTGATGAACTCAAGCAGGTCCTCCGGCTTGAAGATGCGGTTCGTGTTGGCAAGAACCGCCGACCGGTACTCGGTGGCGGACGAGTAATCTGCCAGGCCACTTCGATGGCCGAGCAACTGACGCACGGTTATTGACGCATCGAT…
>Diel5S_2200h_metaT_9422.2.132645.CGTACG.anqtp.hR_trimmed_contig_33172_trimmed	Lake Erie Diel 2014	4.93e-07	28	51	CCCATCACGATCCGTCATTTGCTCACCCATACTGCGGGCATTCCTTATGAGCACCCCCTGGAGCACCTTTCCGAGTACCAGGTGCCTTACTTCAACGCGCTCGACAGCATTACCCTTTCCATGGTAATCCCCAAAATTGCGTCGCGCCCGCTCCTCCACGATCCGGGAGAACAATTCACCTATGGCCTGGCTACCGATATCCTCGGTTATGTTGTCGAAATCGTGGCTGGCCAAAGTCTGGCCTCTTTTTTCAAGCAAAAGATTTTCGAGCCACTCGGGATGGACGATACCCATTTCTACCTTTCCCGGGAAAAAGCGATTAGCCTGGTC
>Diel5S_2200h_metaT_9422.2.132645.CGTACG.anqtp.hR_trimmed_contig_394511_trimmed	Lake Erie Diel 2014	4e-09	34.26	50.93	GGTGTCGTCCATGCCGAGCGGGCCAAAGATGCGTTCACGGAAGAATTCGTCGAGCGGTTGGCCGGAGATGATCTCGACGATCGCGCCGAGGGTGTCGATGGAGTGGCTGTAGCGCCATTCCGTGCCCGGAGAGAAGGCAAGCGGAAGCTGGCCGATCTGGCGGGCCATATCCTGCAGCGTGTCTTTCGGGTGGCCGACCTTGCTGTTGCGGTAGATTTCGTCGGTCTCGTCCTGGAACAGGAAGCCGTAAGTCAGGCCGGACGTGTGCGTGACCAGATCAAGCACCGTCATCTCGCGGTCCGGTTTGCGCAGCTTCGG
>Diel5S_2200h_metaT_9422.2.132645.CGTACG.anqtp.hR_trimmed_contig_55953_trimmed	Lake Erie Diel 2014	9.36e-12	27.98	44.71	AATGTCAGTAATATCTTAAATGTTATAGGAAGCACCGATTCCAAGTGGTAAAAACACATTTTGTTTCATGTAAAGGTCAAATCTCACTCCACTATGAGCCTCAATAAGGATACCCACCAGTCCGAAGTTGATATTACTGTAGCTAAACCAGGTACCAGGCTTTTTGGTAGTGAAAGTTTGAGTTGAGTACCATTTGCCTCCAGGAAGCAGGAGCTCTCTTACATCTGGGAATGGTGTGGTCTTCATGTTATATGTAGCCCCTATGAAGTCATCGTATTGAGTGCTCTCTCCAATACTAGATTAGTGAGAAAGGATCATTCTATAGGTAATTGGCAAGTCTGGATAAGAAGGATGTCTCAGCTTGAAGCCAAGTGCCGTCGACACATCATCATCCAGCTT…
>Diel5S_2200h_metaT_9422.2.132645.CGTACG.anqtp.hR_trimmed_contig_65804_trimmed	Lake Erie Diel 2014	4.64e-23	32.34	50.88	TTGTTTGGCAAAAATATCAAATCGGATTCCTGATAATCTTTCTATTATTGTGCCAGCGATCCCAAAATTAGTGTTACAATAAGTGAAATATGTTCCAGGGGCATGATTTAAAAAATTTTGAGTATCATAATATGATCCTGATTCGGTTAAAAGCCATTATATTTCGGGAGGGGGGTTTAAATTTCCTGTATCGCTCAAAAATTGGTCGTATTTCGGTCCATCTCTTAGACTTGAAGTGTGCGACAAAATTTGGCGAGTAGTTATAGGAATATTTGGAAATTGAGGATTTCTGACAGTAAAGCCTAAATATTGACTAATATCTGCATCTAAATTTAATTATCCTTCATCATATAAAATCATCAAACATGCGCTTGTTATTGTTTTTGATATAGAGGCGAT…
>Diel5S_2200h_metaT_9422.2.132645.CGTACG.anqtp.hR_trimmed_contig_9340_trimmed	Lake Erie Diel 2014	6.02e-11	30.37	46.67	CATTCCGAGCTTTTGCGACAGCTGTTGGTTGTAGTACTGCTGGAAGGTCCTGTTTGTGGCTTTCTCGATCATATCCTGCAGTAGCAGGTAACAGGCATTGTGGTAGTCCCAGATCGTTCCGGGTACGGCACGATATCGAAGGCACTCCGGCGTCTTGCAGTTGTCATTGCCGCGGTCGAATCCGATTCCCGTCGTCATCGTCAGGTGATGACGCACGGTGATTGCATCCTCTTGCTGTGGTGTACAGGATGACCAGCTCCTCCCGAGATAGGTGGCGCTGGTCTTGGAGATGTCCATCTGTTTTTGGTGCTGCGCGATACCGACCAGCGCGGCCGTCACGGTCTTCCCGGCAGAGGCCCAGTACCAGAGACTATCTTTTGTGAATGATCCGAAGTACTG…
>Diel6S_1000h_metaT_9422.2.132645.GAGTGG.anqtp.hR_trimmed_contig_103018_trimmed	Lake Erie Diel 2014	4.78e-10	36.67	45.56	TTCACCTTCACCTCGGACGGCTTCTTTTCCAAATTTTTCAGGGAACAAATGCTCCATGCTTTGGGTGATGCCAGAACGGTGTTGGAGCAAGTCCATGAGCGTGACCACAGGTGCTGCCCGGGTCTTTCCCTGTACGTCCAAAAACTCCGGGAAATAAGCATAGACTGGGTCGTCCAATTTCAAGATTCCCTCATGGGCAAGTTTGGCTACTGCAACGGCCGTGAAAAGTTTGGATACCGATCCCAAGTTGAATATCGTAGAGTCGGTCCAAGCAAGCGTGCCGCCATTGTTGGCGCTTCCATGGGAGTAGCTGAAATCCGATTTTCCTTT
>Diel6S_1000h_metaT_9422.2.132645.GAGTGG.anqtp.hR_trimmed_contig_10666_trimmed	Lake Erie Diel 2014	6.02e-11	30.37	46.67	CATTCCGAGCTTTTGCGACAGCTGTTGGTTGTAGTACTGCTGGAAGGTCCTGTTTGTGGCTTTCTCGATCATATCCTGCAGTAGCAGGTAACAGGCATTGTGGTAGTCCCAGATCGTTCCGGGTACGGCACGATATCGAAGGCACTCCGGCGTCTTGCAGTTGTCATTGCCGCGGTCGAATCCGATTCCCGTCGTCATCGTCAGGTGATGACGCACGGTGATTGCATCCTCTTGCTGTGGTGTACAGGATGACCAGCTCCTCCCGAGATAGGTGGCGCTGGTCTTGGAGATGTCCATCTGTTTTTGGTGCTGCGCGATACCGACCAGCGCGGCCGTCACGGTCTTCCCGGCAGAGGCCCAGTACCAGAGACTATCTTTTGTGAATGATCCGAAGTACTG…
>Diel6S_1000h_metaT_9422.2.132645.GAGTGG.anqtp.hR_trimmed_contig_118000_trimmed	Lake Erie Diel 2014	9.18e-12	28.48	46.2	TTTCGAATGGCATCGCAGACCAAAGCTATTACCAGTCTGGCGGTGATGATGCTTTTTGAAGAAGGAAAATTTTCGCTGGACGATCCTATCTCTCGTTACATTCCCGAGTTTAAAAATCCAAAATTGCTGGGTACGGTAAATTGGACGGATACAACTTACTCCACTAGTCCAGCTAAAAATGAAATTACAATCAGGCATCTTCTCAGCCACACATCCGGTATCGACTATGCCGACATTGGCAGTCAGGAATTCAAAGCCATTTACGCAAAGTCAAAAGTACCCAGCGGCATTGGTACCAACAACATTGTTCTGGCCGACAAAATAAAAATACTGGGAACGCTCCCGCTCAAACATAACCCGGGTGAGCAATTCACCTATGGACTGAATACCGATGTGCTT…
>Diel6S_1000h_metaT_9422.2.132645.GAGTGG.anqtp.hR_trimmed_contig_121430_trimmed	Lake Erie Diel 2014	5.6e-22	26.37	45.16	AAGCGCTCTATCTGCGCGCTCATCCGCGACGGACAATTCCTGCGTGAGAATGCTCACAAGTCGTGCAGCGATGGCAACCGGTTCAGACGGACCCTGATTGACGAGCACCGCCAGACCGACGTCGATCGATGGAACGTAAAGAACGATACTTTCATAACCCCGGATCGATCCTGTGTGACCCAGCACGACATTGCCGGAAAGTATCTGGCGGCTCACTCCCAGTCCGTACGTCACGGTATCCATGTACGTATGCATCTCGGCTAGCGAGGCCTCCGATATAACCTCTCCTCGGTGCAGCGCACGCATGAACGTGGCGATCTCGCGTGCCGTCGAAAACACCGCGCCGGCCGTCCATGCACCACTGAATGCCGCATTGATCGGTACGTTCTGTCCGCTCTG…
>Diel6S_1000h_metaT_9422.2.132645.GAGTGG.anqtp.hR_trimmed_contig_12164_trimmed	Lake Erie Diel 2014	2.08e-23	26.39	43.4	ATTGTAAAGAAAGATTACGGCATGATCCCGATCGGGGACAAATAAAAACGTACTTCTGTACCCTTTTGCCGAGCCATTTTTTGAAACAACTTCCACTCCCCCCAAATAGTTAATCATCCAGCCTGGAGAGCCAGGAAGGTTCGGTTGGGTAGGCTCCAACATCTGGCGGTAACTGGCAGGACTGAGGAGTTTATTCTTGCGGATGGCATTGTAGAATTTGAGCAGGTCACCAAGAGTTGACTGCATGAATCCTGAAGGGATGTTGTAAAGTCCGCCAGGTGGCATTACTTGGTCAACGGGCAGTAATTGCCCATTTCTATCAGCATTTATGTATCCAGTCGCTGTATTGGCATCTCTAAGTCCAAATCCTGTGCGGGTCATACCCAGCGGCAAGAATAT…
>Diel6S_1000h_metaT_9422.2.132645.GAGTGG.anqtp.hR_trimmed_contig_12256_trimmed	Lake Erie Diel 2014	2.7e-06	25.36	37.32	GGTATCGGCCATCCCCAAAGGTCCTGTCAGGCGATTTTTTAGCAAAACTTCGTACGACACCTGCGCCTGTGTAGCCAACAGACTACCGAGCAAAGCAATACCCGTTACGGAAAATTCAAATTTCTCTCCAGGAGGGAAGCGAAAAGTACTGTTGCCTGCCTGCCCCAGAAGCGCTTTTACGTCCGGAAGGTCTTTTCCCTCCAGCTTTGGGGACGAAGGGCTGGCCAGTGGATGCCAGTCCACCACCGGCTTACCCGGGAATACCAGCCCGGAGGAGTGATATGCCAGCTGACACAAGGTAATTTCCGTTGTCCCTGCAACCGGATCGGGCATACATACGACGGTTCTTGAGGGTACAGAGTTATCAGCGCTGGAGTCCGGGTAAGTTTCTACCAGACG…
>Diel6S_1000h_metaT_9422.2.132645.GAGTGG.anqtp.hR_trimmed_contig_151558_trimmed	Lake Erie Diel 2014	1.58e-22	33.5	45.63	GGCCTTCTCAAAGGCCAGGAGGTCATCAAGGCTCGTGACGATGCCCCCGCAGCCGCGGTAGCCCCAGGCCCACGGATGATCGACCTGCGTATGCCCGGGAATTCGGCTCGCCGCACGCGGGCGGAGGCGATCATCGCCGAGGAAGCCGGTGCTCTTCATGCCAGCGGGGTCGAAAATGCTCGACTTGATCCGCTGCTCAAAGGGCTGGCCGCTGACCTCCTCGATGATCGCCGCCAGAACGATGTAGGCGTGGTTGTTGTACGAGAAGCGCTCGCCCGGCGGCGCGATCGACGCCGAGTCCATGAAGTCGCGCACGACCTGATCGCGGTCCTCGGCCAGATACGGCGGCATCTTGCTGTCGTTGTCGCGTCCGGATGTGTGCGAGAGCAGGTGGCGGAT…
>Diel6S_1000h_metaT_9422.2.132645.GAGTGG.anqtp.hR_trimmed_contig_164317_trimmed	Lake Erie Diel 2014	1.04e-26	40.69	54.48	GGGGTAGTCCTGTCCGCTGGCGCGGGTGATGATCTCGGCGAGCAGCGCGTAGCCCTGATTCCAGTACTCGAATCGCGTGCCGGGGGTGTGGCGCGGGCCGCCTTCGAGGAACAGCGGGAGCACGGCGGCAAGGTCGCTGCCGGCACCCTGGGAGTTGCCGCCGGGGATGCCGGAGGTGTGGTGCAGCAGGTGGGCGATCGTGATCGATGCGCTCTCCTCGGGCACGCCGGGCAGGTGCCTGGCGATCGGGTCATCGATGTTCAGCTTGCCGTCCTGCTGCAATCGCAGGATGGCCGCGGCGGTGAACTGCTTGCTCAGCGAGGCGATTTCCAACAGCGTCGCGGGGGTGTTGGGCACGGTGCCCGACTCATCCGCGAAGCCGACGCCGGTGGCGGCGAT…
>Diel6S_1000h_metaT_9422.2.132645.GAGTGG.anqtp.hR_trimmed_contig_175549_trimmed	Lake Erie Diel 2014	6.03e-09	31.76	43.24	GCCGAGCGGCACGCGCAGTGCGGCGTCGAAGATCTGCTGCCAGGACTTTCCTGTTGCCACCTCCGCCATGCGACCGGCCACGCGCAGATGGGTGGCGCCGTACCAGTAACGCGCCTTCGGCGGCGCCAGCACACCCGGTTTGCTCTGGCTGTCATGAATCCGCAGCACCGCCTCGGCCAGCGTGATGCTGGTCGCGGTGGCTTCGTCCACGTCGCCCTCCAGGCCGCTGGTGAACGACAGCAGGTCAGAAAGCGTGATTTGGCCTATCGGCCCGCTCCACGGTGCGCCGTTGCGGTCGACCAGCAGATCGCCCGTGCGGGTCGCCAGCGTCAGGGTGCCTTGCTGCACCAGCCGCAGGATGGTCGATCCGGTGACCCATTTGGTGGCCGAGGCGATGGG…
>Diel6S_1000h_metaT_9422.2.132645.GAGTGG.anqtp.hR_trimmed_contig_191470_trimmed	Lake Erie Diel 2014	7e-08	42.5	55	ACCAACTACCAGCTGTTGGGACGCATCATCGAGGTATTGGAGGGGGCTCCCATTGCCGAGGTTCTGCAGCAGCGATTGTTCGTGCCACTCGGTATGGCGTCGACGTATATGTATACCGACCCTTCAGATACGCGGCCCATGGCGCTGTACTATAAGCAGAAGCCGCTGCCCATCCCCAAGGCCATGACGTCATTTGGTCCCGATGGCGGCGTCGTGTCGACGTCCTCCGACATGATGATCTTTCTACGTGCATTCTTCGGCGACGCAATCGCCCCCTCGACAGATCTTGACGAGCTTACGCGCACATGGAACAGCATCTGGTTCCCATTCACCTACGGCACGGGCATCATGTGCTTCCGGCTTCCGCGGATCTTCTCGCCCTTCAAAGCCCAGCCCGAA…
>Diel6S_1000h_metaT_9422.2.132645.GAGTGG.anqtp.hR_trimmed_contig_220397_trimmed	Lake Erie Diel 2014	5.88e-12	35.85	51.89	TGAAGGGTCGGTATACATATACGTCGACGCCATACCGAGTGGCACGAACAATCGCTGCTGCAGAACCTCGGCAATGGGAGCCCCCTCCAATACCTCGATGATGCGTCCCAACAGCTGGTAGTTGGTGTCGGAGTATTCGGCCCGACCCGCCTGCCCGGGCCTGAATGCAGGGCGCATGCCACGCGCACGCTCCAGAACATCCTCTAGCGTCCACGATCTGTCGCTGCCGGCAAACAGCTCATCCTGCAGGCTCCTACCATGTACCTTTCGCTGGAAGTAATCCGGAAGTCCGCTCGTGTGCGACATCAGCTGCCGGATCGTCAGCGA
>Diel6S_1000h_metaT_9422.2.132645.GAGTGG.anqtp.hR_trimmed_contig_227886_trimmed	Lake Erie Diel 2014	4.26e-15	30.2	45.05	AAATGCCTGGTTCTTAGCGACTTGTATAAGACTGGAAGTGCCTGTATATAAGGTCGCAAGCCGTGTCGCCTTTGACCTGGGCAGATAAAAATACGTGTCTTTCATCCCAACGGGGCGAAAGACTAATTGCTTCAACAATCGATCGAGGGGTTGGCCGCTGGCAACTTCCAGTACCCGGGCCAGTACGTCCGTACTGTTCCCATAGCTAAAACGGTCACCAGGCTGGTGCATTAACGGAATTTTAGCCAGGGCGCGTACTTCTTCTTCCAGGGTTCTGAATCCTGCCCCAAGCCCAAATCCAATCCCCGCCTCCCGATAGTAAGCGGCATATTGTGGATATTCGTCAGGAGACGAGATACCCGAAGTGTGGGTAAGCAAATGACGTACCGTAATCGGCCT…
>Diel6S_1000h_metaT_9422.2.132645.GAGTGG.anqtp.hR_trimmed_contig_231725_trimmed	Lake Erie Diel 2014	7.72e-08	25.77	40.2	GCCGTTCCAGACGCCTTTGGCGAGCGCGAGCAGGCCGAATCGCGCCATATCGCGGGCCCTGCCGTACATAACATGGTCTATCCAGAGGCCTTTCATGCCGGTGGGGTCGAACACCCGGGTTTTGGTGAACAGGTTGATAGACTGTCCGGCTGCTTCTTCGATCACGTCGTGCAGCAGGCGATAGGGTGCGTTGTAGTATGCCCAGCGCGTACCGGCGTCGGTTTTGTACTGCAGGCAGGCAGGGTCAGTACAGTTGTCGTTTGAAACAACGTCCTCCAGCCCGCTGGTCATCGTGAGTTGATGCCAGGGCGTGATGAGGAGTTCTTTGTCGGGCGGGCAGACCGTCCAGCCGGCGCCCAGGTACGTGCTTGTCGGGGCGTGGATATCCAGCAGGCCTTC…
>Diel6S_1000h_metaT_9422.2.132645.GAGTGG.anqtp.hR_trimmed_contig_238699_trimmed	Lake Erie Diel 2014	4.85e-08	26.51	44.58	AAGACCAGAGATGTCGCCGAGAAGTTGGCGGATGGTTACGTTTTGGCTGTTGAAGGGGTTGCCGATGCTGAAGGTGGGGAGAAGGTTGACCAGGGGAGTATCGAGGGAGAGGGATCCTTTCTCTCTCAACGCGAAGGCGGCCAAAGTGGTGAACAACCTGGTCAAACCTCCAATCCTGAAGAGGGTATCGAAGGTAACGGGATCAGCGTCAGAAATATTCTTTGATCCAAAGGCATTCTTGTAGATGACGTTATTATCGTAGACGATACCAATGGTCATACCGGGGATGTCCAAATCCGTCATCAAATCCTGCCAGGTCCTCTCGAGGGTCTT
>Diel6S_1000h_metaT_9422.2.132645.GAGTGG.anqtp.hR_trimmed_contig_25306_trimmed	Lake Erie Diel 2014	4.9e-09	27.37	46.32	CCGTTGAGCAGATACACCGGGTGGCTTTGATGAGAACAGTGCCTCGGCGATACGTTCCTCGACCGCCGGACGCAGCTCCACACCCATAGTGTTGGACAGGACCACGATCGAGAGGTCCTCCTCCGGGTAGTGGGAGAGAAAGCTCGAAAAGCCGATGATCCCACCCGGATGGGCAATTTTTTGCCGCCCTTGAAACTGCGTGATGGCAACGCCCAGGCCATATGAGGTGGGCTGGCCGTCTTTGAGCCGACCGCGAGTGGTCATCAGCTGCAACGTTTCCTCCTTGAATACCCTGCCGCCGAATAATGCTCGCTGCCACGCCATGAGGTCGAGAACCGTCGATATCAGAGCGCCCGATGCGTACGGACGTGTGGAACTGTTTGGTTGTGCATTGACAAA…
>Diel6S_1000h_metaT_9422.2.132645.GAGTGG.anqtp.hR_trimmed_contig_268793_trimmed	Lake Erie Diel 2014	3.06e-06	24.47	46.81	CTCCTCGTAAGTTTGGCCGCTGACAGCTTCAATCACTCTTCCAAGTACAGTGTAACCGAAGTTGGAGTATTGGTAGGTGGAGCCAGGTTCGAATTGCAAAGGCTTCTCCTTGTACCAATTCACCAACTCGGCGGTGGTTGGGAGTCTGTCAGTGATTCCCATCTCCTTTTGCCAGGTTACTACACCTCCTCGCATGGTGGGTTGCAAAACATTTTTGTCCCAACCGGCCGTGTGGTGAAGAAGCTGCTCGATGGTGATGTCTTCAATTCTGGGGTCTCGCTGTTTGGCTTCGAATTCGACTTCTTCAGTGAGAAATTCCTTGAAGGGTTGGGTCTCCATGGTCAATTTTCCTTCTTCAATCAACTTCAGAATGGCAACAGCCGT
>Diel6S_1000h_metaT_9422.2.132645.GAGTGG.anqtp.hR_trimmed_contig_278618_trimmed	Lake Erie Diel 2014	7.42e-10	30.4	45.6	GATTACATAGTTTATATTTGAATAATTGAAATAACTACCCGGTTGGGTGTTATTGAATTGTCCTGTCGTGTAATACGCGCCAGACGGCGTGAGTATTTCGCTTAAATTGGGGATCGGGTTGTTCTGAACCGTCGCAATCAAAAAATTGTCATACGTCGGCCCGTCAATAATCGTCGAGGTATGGGATAACAACATCCGTGTGGTTATTACCACGGTGGGTTTGTGCGGGTTCCGTACCGGATAACCCAGTATGGTACCGATGTCTGCGTCTAAATCCAACAAGTTTTGCTCCGCCAGCTGCATGGTTGCAATGGCTGTAATCACTTTGGAAATACTTGCAACCCGATATTTGGTCTCTGCCGTTGCCGGGATGTTTCGGGCGTAGTCTGATTTTCAAAC…
>Diel6S_1000h_metaT_9422.2.132645.GAGTGG.anqtp.hR_trimmed_contig_287802_trimmed	Lake Erie Diel 2014	3.55e-15	32.73	50.31	CAGGGCTTCCTGCATAGTAGCCCTTTTGACAAGTTTTTCCCCGTGTAACGCCTGGTCCCACCTGAGCAGGTCTTCGACAGACGAATAGACGTTGCCATCGCCGTCCGTCCCATCAAAGCGCCCCAGGTCATCGGCAATGGGGTTTCCTTCAAACCTGCGGAAACCGTAAACGCGGTCGGCTGGCTGGCCGCCAAGCTTGAGGTGATATACCTGGGTGTTTTTCAGTCCCAGAGGAACAGCGATGCGCTGCTGAAAAAATACTTCGAAGGGTTGCCCGGAAGCTTTTTCGACGAAGCGGGGCAGTAGGATATAGCCGGTGTTGGAATACTTCCAGCGTTCACCGGGCGAAAAATCCAGATCGGGCTTGTACCGTACCAGAAGTTCCAGGATATCCTCATT…
>Diel6S_1000h_metaT_9422.2.132645.GAGTGG.anqtp.hR_trimmed_contig_305416_trimmed	Lake Erie Diel 2014	5.23e-19	35.63	60.92	AATACCTGTCCTATGAGAAAGCATATCTCTCATGGTGACATGGGTATTTAATTCAGTATTATAAAATTCAATCTGGGGGACATATTTCTTTACAGGCTTATCCCATTCTAATTTTCCCTCTTCCACTAGAAATCCGATTGCAGTAGCTGTAAAGAGTTTGGTATTTGAGGCAATCTGAAAAAGTGTATTGGGCGTAATGGGCAATTTGTTTTCTAAGTCGCGATAACCGTACCCTTTTGCAAAAACCAGCTTATCCTTCATGACAATACCCACCCCACAACCGGGTACATTCCAATCCTTAAGGATTTTATGAATCGTCGAATCAATGCCTTT
>Diel6S_1000h_metaT_9422.2.132645.GAGTGG.anqtp.hR_trimmed_contig_50014_trimmed	Lake Erie Diel 2014	4.26e-08	25.35	40.85	AAGTCCGCCATTGGAGACCGTGATGCCGGTATCGGGATCGAACGGTGCCGGGGTCAGCTGACCGTCACGCAGATAGTAGCCGGCCGCCCGATCCCTGAGCAGGTGGGGCGGAGTGCGATCGAAGTAACTCCGGTGCATCTCGAGTGGCTTGAAGATATTCTTGTCGATGTAGACCTCAAAATCCTCGCCACTGACAATCTCGATCACCCGGCCAAGAAAGATGACACCAGGGTTAGAGTAACTGAACCGGCTCCCGGGCTTGAACTCAATCTCGGTGTAGGGCAGCATCGCGACGATCTGTGACCATTCACGCGGCTCGAATGGGTGCCAGGGCTTGTCTCCACCCCACGGCCAGGTCGGGTTCCGGAGCCCCGCGCTGTGCGATAGCAGATGCTTTAA…
>Diel6S_1000h_metaT_9422.2.132645.GAGTGG.anqtp.hR_trimmed_contig_60457_trimmed	Lake Erie Diel 2014	2.45e-08	27.34	46.88	GTCCACGCCGAAGCGCGTGTCACGCATCCCCAGCCGGTGGAACACCTCGTCCTGGAGAAAGAGCTGCAGGGGGCGATCGGCCACCGCCTCCACGATGAACCCCAGCAGGTCGGCGCCCAGATCGGAGTAGGTGTAACAGGTGCCCGGGGGACACTGGATCGGCGACCGGAGGACGGCTTCACGAGCCTGGGCCGGCGTGCTGGCCACCCGCCAGAGCTCGCGCCCCGCCGGGAGTCCGCCCCGGTGCGTCAGCAGGTGGCGGACCGTGACCTGCTCCCGCCGGTTCCCCGTGAACTCCGGCAGGTAGCGCGACACCGGAGCATCGAGCTCCACAAGCCCCCGGTCATACAGCACCATCAC
>Diel7S_1600h_metaT_9671.6.140856.ATCACG.anqtp.hR_trimmed_contig_108825_trimmed	Lake Erie Diel 2014	2.31e-11	25.18	42.07	CACTCGTTTGCCATTATAGATTCCTCCATTCAATAACATTTGCAGAAAGATGGCATAATCTTCAATGGTTGAGGAAAGACCTGCTCCTCCTGAGTAATACGTGCTACCCTCCAGTGGATAATCGGGTGTAATGGTTCGGCCGTTAAGCATATTGCCAGAGGACTTCTCTAGTTTTCCTCCTGGTAATTCACGATAAAGTTTTGCCAAGCGGGTTGCTTTTGCAGCGGGTAAGTGAAAGTGTGTGTCATTCATTCCCAGTGGCTCAAATATTTTTTCTTTAAAAAATTGATCTAATGTTTTGCCGGAAATCTGTTCTACTAAGCAACCCAACAAGTCTGAGTTTAAGCCATAGGTCCATCGCTCTCCAGGCTGATGCATGAGTGGAAGTTTGCCCAATCG…
>Diel7S_1600h_metaT_9671.6.140856.ATCACG.anqtp.hR_trimmed_contig_124571_trimmed	Lake Erie Diel 2014	5.42e-25	33.69	51.41	ATTGCTTCTTTTCGTGTTCCCGGAATTGCAGTGGGAGTTGTAAAAGATGGAAAAATAATTCATGCGAAAGGATACGGATTTAGGTCTTTAAAAAACCGACAACCGGTTACTCCCAACACTCAATTTGGAATAGCTTCCAACAGTAAAGCTTTTACCGCAGCTGCTTTGGGAATTCTTGTCGAGCAAGGAAAAATAAAATGGGAAGATCATGTGCGGGACTATATTCCAGAATTTAAATTGTACGACCCTTATGTAACAGAGCATTTTACCATCAAAGATTTATTGACACACAGGAGTGGTATGGGTTTAGGAGCCGGGGACCTCATGTTTTTTCCAGATTCCAGTGATTTTACACTCAAGGATATTATTTATAACCTTCGTTTTTTGCCACAGGTTTCT…
>Diel7S_1600h_metaT_9671.6.140856.ATCACG.anqtp.hR_trimmed_contig_139563_trimmed	Lake Erie Diel 2014	1.39e-09	27.38	48.81	GAGACCAGACAAATCGGTCAGCACAGATTTGATGCTGATGTCGTCACCTGTGAAGGGGTTGACGATGTTCAAGCCAGGCAACAAATTCTTCAGGGCTTGTTCCAAACGAAGCTGTCCCTTATCCCTTTGCTGGTAGGTCAATATGGCGGTGAAAAGACGAGTCAAACCACCGATACGGAAGAGGGTCTTGGAGGTGACGGGGTTGTTATTAACTCCAGTACTTCCAAAGGTGCCATTGTAAATCACTCTTTGGTTGTAGGCAATACCGATGGCTACCCCAGGGATGCTCAAATCGGACCTGAGGCGAGTCCAGGTGCGTTCCAAAGTTCT
>Diel7S_1600h_metaT_9671.6.140856.ATCACG.anqtp.hR_trimmed_contig_146846_trimmed	Lake Erie Diel 2014	4.74e-25	31.84	50.28	AGCTAATTCACTCATAGAAAGTTTCATACCTCCTTGGGGACCAAAGATAGCTCCGTTTGTACCTATAATATATCTGGTCAAATCTCTTGCAGCTGGTTTTACTCCTGAATAATGGTCGACTTGAGGGATCCATTTTCCATTACTATCAGCCCTGTAAATAGTTGCGAGTTGATTAATATCGGGAAGATCATCTACATTGAAAGATCCTGTGATTCCTAATTAGTTTAATAATTATTGTTTGGCAAAAATATCAAATCGGATTCCTGATAATCTTTCTATTATTGTGCCAGCGATCCCAAAATTAGTGTTACAATAAGTGAAATATGTTCCAGGGGCATGATTTAAAAAATTTTGAGTATCATAATATGATCCTGATTCGGTTAAAAGCCATTATATTTC…
>Diel7S_1600h_metaT_9671.6.140856.ATCACG.anqtp.hR_trimmed_contig_152251_trimmed	Lake Erie Diel 2014	5.95e-08	26.56	52.34	CGGTTTCCATAATTTTTCAGAGGCATACTCACTCAAGGTCTTACCTGTAACCCGATTTAGTACCAATGCTAATAATTCCGTATCTCCGCTTTTATAATTCCAAAAGATTCCGGGGGTATCAATAATAGTTACGGATTTAGCCAGTTCCTCAAGCTGTTGGCCATAGTATGCTTTAGTAACTATGGAAAATAAGGATTCATAGGACTCATCCCAATCGGAGCCACTGCTCATCGTCAGTAAATGTCTGATCGTTACTTTCTTTTGCAGATCACTGTTAAAATCGGTTAAATAATCAGAAACGGGGTCATCAATAGACTTAATTAACCCATCCTGAAGAGCAATACCAATAAGGGTACTGACTATAGACTTGGCTACGGA
>Diel7S_1600h_metaT_9671.6.140856.ATCACG.anqtp.hR_trimmed_contig_23788_trimmed	Lake Erie Diel 2014	3.7e-09	23.81	40.21	GCTGCTTTGCAAGTTTAACGGCTCGAAAATATTTCTCTTCAGATAATCCTGGTACTTCAAGCCACTTAACTTTTCGATCATATAAGTTGCAAGAATAAAGCTAGGATTTGAATAGGAGAAGTTGGTCCCCGGAGTGAATATTAGAGGATCGTTGATGAATAGTCCTACGTAAACTCCTACAGTGCCCAAAAATTCCCCAGTATAGACTTCATAATCCTTTAGATCATTACCTATACCCGAAGACATGGAGAGCAGTTGCTCGTATGTTACATCAATGCATGTTCCGTTTGGCATGTCTTGAAGTTGAGGACACCACGAAGTTTGGTTAGGAAATCCAAACTTGACAAAATCATCTTGTGTAAGGTCATCGTTAATAGGCTGTGATAAGTTAACTTTGCC…
>Diel7S_1600h_metaT_9671.6.140856.ATCACG.anqtp.hR_trimmed_contig_244912_trimmed	Lake Erie Diel 2014	8.69e-09	27.12	43.55	GAAATGATTTCTATAATTAGCAAAAATAAGCTCGACTTTGCTCCTGATACAAAGGCCCAGTACAGCAATTCAAATTTCGTGCTGCTTGGGTTTATCGTGGAAAAACTTAGAAAGAAATTGTATTCGCAAATTCTTGATGAGCGAATTGTGAAGAAGGTTGGACTCACGGATACATATTTCGGTAAAGCAGCAGATTTGAAAAACAACGATTGTTATTCTTATCAGTTGACAAACAATGAATGGAAACGAGAACCAGAAACCGATATGAGCATTCCGCATGGAGCTGGTGCCATTGTCTCTACGCCAACAGATTTAGTTAAA
>Diel7S_1600h_metaT_9671.6.140856.ATCACG.anqtp.hR_trimmed_contig_255128_trimmed	Lake Erie Diel 2014	2.72e-07	28.38	51.35	TGCTTGGGGTCCAAAAACAGCACCATTCGAACCTACAATATATCTTGACATATCTCTAGGTGATGGTTTTACTCCCAAATAATGATCAATTTGCGGAACCCATTTTCCTTGACTATCTGCTCTGTACAAAGTAGATAATTGATTAATATCAGATAGATCATCCATGTTAAATGAGCCTGTTATTCCCAATTATTTTAGTATTTTCTATCTAACAAATATATCAAATCTTATATTAGACACTCTTTCAATAACAGTCGCAATGATTCCAAAATTGGCGTTACTATATGTGAAATAGGTACCTGGTTGTTTATTTAA
>Diel7S_1600h_metaT_9671.6.140856.ATCACG.anqtp.hR_trimmed_contig_267690_trimmed	Lake Erie Diel 2014	3.87e-25	45.35	61.63	ATCGTATATCTCGCGAAGGCCACTGATATGGTGCATTAGCTGCCTTATCGTGACCTTACTGCCAAAATCCGGGATATCTGGGAAATACAGGCGAATATCATCGTCTAAGTCCAATTTACCCTGCTGTTCGAGCAATACAATACCCATACAGGTCAACTGCTTGGCCACCGAGCCAATATCCGAGACGGTCTCTGGCGTAAAAACCGTACGCGTTTCTAAATTAGCTAATCCAATGCCCCTGCGGTAAAGGGTTTTCCCGTTTTGTATAATCCCAACCCCAAACCCGGGACTGTCAGTCCGATCAAACTCCTGGAAAAGATTATCCAGCTT
>Diel7S_1600h_metaT_9671.6.140856.ATCACG.anqtp.hR_trimmed_contig_28202_trimmed	Lake Erie Diel 2014	1.56e-17	27.14	45.79	CCTGGCGCGGTGGTGCTCATTGCACGAAATGGCAAGATCGTCCACTATAAAGCCTACGGTTATAGCGATTTCGAAAAACAAACACTGTTGAAAAAAGACGACATCTTTCGAATGGCATCGCAGACCAAAGCAATTACCAGTCTGGCGGTGATGATGCTTTTCGAGGAGGGAAAATTTTCGTTGGACGATCCTATCTCTCGTTACATTCCCGAGTTTAAAAACCCAAAATTGCTGGGTACGGTAAATTGGACGGATACCACTTACTCCACTAGTCCAGCTAAAAATGAAATTACAATCAGGCATCTTCTCAGCCACACATCCGGTATCGACTATGCCGACATTGGCAGTCAGGAATTCAAAGCCATTTACGCAAAGTCAAAAGTACCCAGCGGCATTGGT…
>Diel7S_1600h_metaT_9671.6.140856.ATCACG.anqtp.hR_trimmed_contig_287037_trimmed	Lake Erie Diel 2014	2.4e-18	35.19	57.01	ATCTTTAAGGCCTGATGTGTGTGTCAATAAATGCCTGATCTTTATTTTTTTCGCGAATTCCTTATTTTTAAAATCCGGAATATATTTAAGGATGCTATCTTCTAAATTTAATTTACCTTCTTGTTGTAGAATTAAAATGCCATAGGCGATAAATGTTTTTGAGATCCCACCAATGTTCACTAGTGTATAATCATCAAATTGTTTTTTACTTTCAATATCGGCAACTCCAAACGGTTTGTAATAAAGCATTTGATTTCCCATCTGAACATAAATATATCCACCGGGATCATTTGGGTTAATGGAAGAATAAACAGAATCTAGTTT
>Diel7S_1600h_metaT_9671.6.140856.ATCACG.anqtp.hR_trimmed_contig_288571_trimmed	Lake Erie Diel 2014	1.35e-06	29.81	45.88	AGAATATAGCAACGCATTGCCAAACTGAACCAAGTCTTCTACTGTTGAAAGAAATCCCCCTCCAGCCCATTTATAGGAATTATCGACGTAGGGAGCGTTTTCCAGTCGACCTTTATCGTTTCGGATATAGTACCTGGCGCGATTGTAAATCAATGGCGGATTTAAATCTAAATAGGTGTTTTTCAGTCCTAGCTCGTCAAAAACAGTCTTTATATAAGTAGTAAAAGGCTTTTTAACAATGCTCTCAACCACTGCACTGATCAAAGTCCATCCATGGGTGGTGTATAAAAATTTGGTGCCTGG
>Diel7S_1600h_metaT_9671.6.140856.ATCACG.anqtp.hR_trimmed_contig_292513_trimmed	Lake Erie Diel 2014	3.77e-16	31.33	49.33	TCCTGTTACTGACTCAATTATCTCGGCAAGCAAATAAAAATTAGCATTGCTGTAATAATAATTGTTCAGCCCTCGCGGATTTGCATAACTCCACATTATTAAAGAATCCAATGGAATATCATCAAATCGCTTCATATAAATCCAATAATTGAGGCGACCTTGAAAATCGCTTTGTGGCTCATCTATCCCAGACTTATGACCTAGCAATTTTTTTATGGTTATGTAATGATTGTCGGCAAAACCCTGAACAACATTAGCGGGAAGATAGGTGCTAATTGGTGCGTTGAAATTGATTTGACCATTTTGTATCAATTGGAATATGGCTGCTGTTGTGAACAACTTGGTAATACTCGCAATTTTGAACTTCATCTCGGGTTGTGTGTTTATCAAAGGGGATAA…
>Diel7S_1600h_metaT_9671.6.140856.ATCACG.anqtp.hR_trimmed_contig_301354_trimmed	Lake Erie Diel 2014	2.12e-13	25.95	47.47	GATGCTTGGGACGTCGGCCACATTAAAACTTGATTTTAGCAACATTTTTTCAAATATTCTTTATTTGACAAAAATATCAAATCTTTGTCCTGAGATTTTTTCAATGATCGTACCTACTATACCGAAATTCATATTGCAATATACATAATAAGTTCCAGGTGCGTGTAAATGATAATTTTTCTCACTGTAGTATTTACCACCAAATGCTAATAGATCACTAGTTTATGGTGGAGGGTTTACATTGTAACTAGCTGTCAAAAAATCATCATATAGAGGACCATCATTTAGACTGGAAGTATGTGAGAGAACATGTTTAAGAGTTATGATCGATTCAGGAAAATTTGGATTTCGTAGTTTAAAACCTAGATACAGGCTTACATCTTCATCAAGATTTATTTA…
>Diel7S_1600h_metaT_9671.6.140856.ATCACG.anqtp.hR_trimmed_contig_305206_trimmed	Lake Erie Diel 2014	5.55e-08	37.25	56.86	CGGACTGGCCCATTCGGTATTGCACATCACTGCAACGCCCATACCGCGATTGGGGTAGCACACAAAAATCGTGCGGGCCTTATTCTGGCTTCCACTATGGGCAACACAAAGGTCGGCCCCTGTGCCTTTTATTTCAAAGCCCAGGCCATAATCCCATTCCGGCTGACGGGTCCATATCTTTTCATAAGAAGCCGGCTGAAGCAAGTCTCTGAATATTAAACTCTTAACATATTTCGACAAATCAACGATATTCGATTGATACCCGCCACCGGGAATTTTCCAACTGACATCATCGTCCACCCGCGGGCGGATATCTCCGATGCGGTCCCGATAATATCCTTTGACTTCCTTGAGGTTTTCACCCCAAAGATAATCGGGTTTCAGGGAAGAAAGGCCCAG…
>Diel7S_1600h_metaT_9671.6.140856.ATCACG.anqtp.hR_trimmed_contig_312279_trimmed	Lake Erie Diel 2014	1e-10	30	53.33	TGTATTTGTCATTCCCAGAGGAATTGCAATTTTTTGCTGAAAAAGGCTATCCCAACTCATTCCTGTTGCAATTTCAGCCATTCTTCCTGCTACGTGCATACTTACACCACCGTATCGAAATTCAGTGCCAGGCGTAAATGACATGGGAGTATTCAACCCAATATTGTCTACTGCTTGTTGCAAAGTAATACTATTATCAGAGATAAAAGGCGATTGTCCCGGAAGTCCAGAAGTATGATTCATCAACTGGTGAAGTGTAATGACAGGCTTGCCGCTGAAGCTTGGAAGAAAGTTTTGAACGGTATCGTTTGGCGATAGATATCCTTCGTCTATCAGTTTCATGATTAATGCCATAGATGGCATTTTTGAACCCGAAGCGATTGGCTGGTAAGTTGTGTT…
>Diel7S_1600h_metaT_9671.6.140856.ATCACG.anqtp.hR_trimmed_contig_32077_trimmed	Lake Erie Diel 2014	1.3e-15	34.86	49.49	TATACCGGAAGTATGGGTGAGCAAATCCCGGATAGTAATCTCGCGGTTTGCAGGAACGGTCGTAAACGTGGTATCTTTGGCATTATATTGATCGATTACATTCGGTTTTTTAAATTCAGGCAGGTATTTTGATACCGGGTCATCGAGTAAAAAACGTCCTTCTTCATATAACATCATCACTGCAACGCTGGTGATGGCCTTCGTCTGGGATGCGATACGGAATATCGCATCCCGCTGCAGTGGTTTACGGCTTTCCACATCTGCATATCCAAATGCATTGTAATAAGCGATTTTACCGTTGCGTACAATCAGTGCCGCCCCACCCGG
>Diel7S_1600h_metaT_9671.6.140856.ATCACG.anqtp.hR_trimmed_contig_339955_trimmed	Lake Erie Diel 2014	1.88e-18	34.86	52.29	GATAATTTCCGCCAGTAGCATATATCCGGTGTTACAGTAACTAAAGGCAGAACCAGCGGGAAAATTTTGATCTTCTGACATTTCCACCAACTGCAGGGCATCTTCCTGAAAAATAGGATGGCCCATTCTACCTCCCTGAAGGGCAAGTTTACTGTATATTTCCCTTAAGCCACTGGTATGCTGCATCAGTTGAAGAATGGTTAGATTTCCGCTCGATTTATTTATAAGGGTTGGAAAAAAGGTTGAAAGCTTATCTGAGAAGGCTAATTTTTTCTCTTTAATCAAATGAAGAATGGCAAAATTTGTGATATGTTTAGCCACAGATCC
>Diel7S_1600h_metaT_9671.6.140856.ATCACG.anqtp.hR_trimmed_contig_400396_trimmed	Lake Erie Diel 2014	2.43e-21	34.71	57.02	GTTAAATTTTTCTCCTGGCACTGAATTTAAAGCAGGTTTATACTTTGCTAGAAGTACTAATAGTTGGTCATTCCCAATTGTATCTTTTATTTTAAGCGTATCATTGATCCAATCAAAGTATTCAATCATCCCATGCGTATGATTCAATAAATGTCTTATAGTGATGTCTTTGTATGGGAATTCAGGAAGATACTTATTTACTTGATCATCTATTTTCAATTTTCCTTCTTGTACATGCATCAGTATCAATGAAGATGTGAATGTTTTTGATATGGATGCAAGATTGAATGAGGATGATAATGTAAGTTTTTGATTGGTTTTGCTATCTGTAAACCCAATACTTTTTTCGTAAAGCAT
>Diel7S_1600h_metaT_9671.6.140856.ATCACG.anqtp.hR_trimmed_contig_416743_trimmed	Lake Erie Diel 2014	1.15e-08	31.91	48.94	TGAACCATTTTTATCTAAAGAAACCAAAGCATCATGTTCCATTCCTAATGGGTTCCATATTTTTTCCCGCAGATATTCAGCAAATTTCTTTCCGGTAGCACGCTCTACACACATACCTAAAATTTGAGTAGTCATTGAAGAATACTGAAAATGAGTACCAGGTAAATATCTCATTTTTAATTTCTCACATTTTGCTTCTTGGTCTTTAGCATAATAGAAAAACATTAGCTTGCCTAAATCTTTAAAATCTTTTTCGGCTACTCCTGAAGTCATTTGTAATAGGTGATTAATTGTTATTTTATC
>Diel7S_1600h_metaT_9671.6.140856.ATCACG.anqtp.hR_trimmed_contig_424845_trimmed	Lake Erie Diel 2014	3.46e-11	36.92	56.92	AACCCAAGACATTACTTCTGTTGGTGTGAAAATACGATTAGGATTAGTTAAAATTGAGTCAGCGTATCCAACCACATTATTTACATCAGCTAAACCGCTTGTATGATTGAGAAGTTGACGTATAGTTATGTTTGGGTTGACGTTGTTAAAAGCTGGAAGATATTGGTGTAAAGAGTCATTAAGATTTATGATATTATTTTCCGTTAGTTTTAAAAGCAAAACACCTGTAAATAATTTCGTGTTACTCCCAATTCCAAATTCCATGTCGGAAGTAATGGGAAAACCTGAATGAGATATTCCAGTAACTCCTTTCCAAGTTCCAACTCCAGGGTAAATTACACTTGCTGAAATGCCTTTTAAATTGTTTGCCGT
>Diel7S_1600h_metaT_9671.6.140856.ATCACG.anqtp.hR_trimmed_contig_439392_trimmed	Lake Erie Diel 2014	1.79e-05	30.39	48.04	AAAGAGCTCCTCATTAGAAATAGGGGAGGGAATAAAAGGTTTGCCTATCACTTTTTCATATAGTTCTATGTACCGCTTGGAGATGGTATTGACCCACTCATCTGTCATGAGGGGTACCACTTGACCCTCTTTTCCCATAAAATCGTTGGCAATAAGCCATTCGCGTACGAATTCTTTGCTGAGTTGCGGTTGTCTTTCGCCTTTTTGCTGCCGCTCTTGGAATCCATCCAAGAAAAAATATCTCGAGCTATCAGGCGTATGTACCTCATCCATCAAGTAGATCGTATCGCCGATCTTGCCAAATTC
>Diel7S_1600h_metaT_9671.6.140856.ATCACG.anqtp.hR_trimmed_contig_5351_trimmed	Lake Erie Diel 2014	3.51e-09	23.23	38.89	TTCCATTCCGGCTTTTTCAAAAATAAGTGCCTTAGCAAGATCTTCATATCTAATGCCTGTAGCTAGCTCAACAGCGCAACCTGCCAAATTAAATCCAAAAGAAGTATAATTGTAACTGGTCCCTGGAAGAGCGATCAAAGGATTATGTATGAAGTATTCCAACGCCCATTGTATACCAGTATTAGTTTAGGGATTGTTTAAATAATCATCACTGGGTACTGGATTAGTATTTCCATTGACATAGTCCATGATACCTCCAGAATGAGCCAAGAGTTTTCTGATTGTGACTACATTATCTCCCGGTGGTAAGGGAATGTAAGCAAAGTTACCGATGCATGTGTATGTTGTATTTTTGTATATGATTGTAGAGTTACCTTGACATTTGATGGTCATATTTGT…
>Diel7S_1600h_metaT_9671.6.140856.ATCACG.anqtp.hR_trimmed_contig_65075_trimmed	Lake Erie Diel 2014	2.08e-23	26.39	43.4	ATTGTAAAGAAAGATTACGGCATGATCCCGATCGGGGACAAATAAAAACGTACTTCTGTACCCTTTTGCCGAGCCATTTTTTGAAACAACTTCCACTCCCCCCAAATAGTTAATCATCCAGCCTGGAGAGCCAGGAAGGTTCGGTTGGGTAGGCTCCAACATCTGGCGGTAACTGGCAGGACTGAGGAGTTTATTCTTGCGGATGGCATTGTAGAATTTGAGCAGGTCACCAAGAGTTGACTGCATGAATCCTGAAGGGATGTTGTAAAGTCCGCCAGGTGGCATTACTTGGTCAACGGGCAGTAATTGCCCATTTCTATCAGCATTTATGTATCCAGTCGCTGTATTGGCATCTCTAAGTCCAAATCCTGTGCGGGTCATACCCAGCGGCAAGAATAT…
>HAA9FADXX_s1_1_GSLv3-7_01_SL76112_(paired)_contig_17135_Average_coverage:_3.28_trimmed	Lake Erie 2014	7.21e-14	26.74	44.77	GCGATAAAAATTATCCTGCACATATTGCTCCAAAGTTTTGCCAGTGAGTTGTTCTACAATCAAACCCAAAAAAATAAAATCATTGTCACTATAAACATATTTGCCTTGTGGCCCCAGCGGACTTTTTAAAATACGTGCAAGCAGGGTGTCTTTCCAATCGTCTCTCCGGTATAAATTTTCTGCAACCCGCACGGTGAATCCTTTTTTAGCTACCGTAGCGTACAAACTCGTATCGGGGTTGCCCGTTGCGTCGATGGTTTCTTTATAGAATGGAATGAAAGGAACTAAACCGGCCTGGTGCAATAAAATGTCTTTTATATTCAATGATTCTTTGTCTGATCCCTTAACCCAAGGCAGATAATCTTTGAGTTGTCCTGATAATTTCAACTTTCCCTCTTC…
>HAA9FADXX_s1_1_GSLv3-7_01_SL76112_(paired)_contig_2681_Average_coverage:_2.91_trimmed	Lake Erie 2014	7.62e-14	29.17	47.62	TATCCCGGAGTAACTATCAAACAGTTACTGACACACCGCAGTGGTTTGCCTAACTATACTTATTTTATGGAGGCAGATAAGCAGGGGAAATTAGCCTACACAAACAAGGATATCATCGATTGGATGATCCAACACAAACCAGCACCGCATGCACACCCCGATTCACGTTTTGAATACTGTAATACAAATTATTTACTATTAGCCACGTTGATTGAGAAAACTTCAGGATACTCTTATCCTGAATTTCTTCGCCGTTCTATTTTTACCTTTTTAAGCATGAAGAATACATTTGTTTTTGAACCGGCAGATGCAGTAAAGGCTACACCCTCTTTTGTAAATTCTTCGCAATCATGGCCGCTAGACCATCTCGATTTAACTTATGGCGATAAAAATATTTAT…
>HAA9FADXX_s1_1_GSLv3-7_02_SL76113_(paired)_contig_16302_Average_coverage:_14.45_trimmed	Lake Erie 2014	2.08e-23	26.39	43.4	ATTGTAAAGAAAGATTACGGCATGATCCCGATCGGGGACAAATAAAAACGTACTTCTGTACCCTTTTGCCGAGCCATTTTTTGAAACAACTTCCACTCCCCCCAAATAGTTAATCATCCAGCCTGGAGAGCCAGGAAGGTTCGGTTGGGTAGGCTCCAACATCTGGCGGTAACTGGCAGGACTGAGGAGTTTATTCTTGCGGATGGCATTGTAGAATTTGAGCAGGTCACCAAGAGTTGACTGCATGAATCCTGAAGGGATGTTGTAAAGTCCGCCAGGTGGCATTACTTGGTCAACGGGCAGTAATTGCCCATTTCTATCAGCATTTATGTATCCAGTCGCTGTATTGGCATCTCTAAGTCCAAATCCTGTGCGGGTCATACCCAGCGGCAAGAATAT…
>HAA9FADXX_s1_1_GSLv3-7_02_SL76113_(paired)_contig_48779_Average_coverage:_3.05_trimmed	Lake Erie 2014	5.48e-19	38.97	56.92	CGACACCTTTTCGATGATGGACGCCAGCAACATAAATCCTGTATTGCTGTAGCGCCACTCCTCGCCAGGCCGGAACAGCGGGGCAGGCTTGTGCTCAGCCAACAAACGAATCATATCGGCATTAAATGCAATGCGGCTATGATCCCACTTTTCGTAAGCCAGTTCTTCATAATCCGGCAACCCGGAGGTGTGCGTAAGCAAGTGATGCAACGTGACACCCGTGTAGGGCAAATCGGGAAAAAAATGTCGCAATGAATCGCTGAGTGAGAGTTTTCCACGCTCCGCCAGAATGAGTACACCCGTTGCCGTAAACTGTTTCGATACCGAGGCCAGTTCAAACATCGTTTCGGCATCAATCAACCCTTTGGTCCCGATATCAGCATACCC
>HAA9FADXX_s1_1_GSLv3-7_02_SL76113_(paired)_contig_60942_Average_coverage:_2.76_trimmed	Lake Erie 2014	1.03e-10	35.79	53.68	GTACGCCGCGGGATCACCGTCGGTGCCTATCCCGGCGCAGCGGTGATCGTCGGGCGCCGTGGCTTCACCGTCTGGAAGAAGGGGTACGGCCGGATCAGCTGGAACGAGCATGCGCGCCCCGTGAGTCCCGACGAGACGATCTACGATCTCGCCTCCCTCACGAAGGTCGTCGCGACCACCACCGCCGTGATGATCCTCCACGACGAGGGGAGGCTCCGGCTCGATGCCCCGGTGCAGCAGTACCTCCCCGAGTTCACCGGGGCCGGGAAGGAGCGGGTCACGGTGCGGCAGCTCCTCTCCCATCACGCGGGATTGCCCGCTGGCCTCGCGATCTGGCGCACCGCGACCGAT
>HAA9FADXX_s1_1_GSLv3-7_02_SL76113_(paired)_contig_68615_Average_coverage:_4.97_trimmed	Lake Erie 2014	2.14e-09	35.21	53.01	ATGATCTACCACAAGGCTGGCGTAATGGACTTGTTTACGACGGAGAAAATCACCATTGGCGAAAGTGTGAAGCGCCTAGCCAAACTGCCTTTGCACCATGAGCCAGGGGCCAAATTCACCTACAGCGAAGGGCTAGATGTGTTGGGCTATTTGGTGGAAATTATTTCTGGCAAGCCCTTCGATGTGTTCTTGAAAGAACGAATTTTTGATCCACTTGGCATGAACGACACCCGTTTTTACCTCAATGATGCCCAAGGTGATCGTTTAGTGGATGTACATACCTACCAAGGAGGCAAATGG
>HAA9FADXX_s1_1_GSLv3-7_02_SL76113_(paired)_contig_70615_Average_coverage:_2.61_trimmed	Lake Erie 2014	9.38e-12	28.16	51.49	CCCGGTGCAGTGGTACTTGCTGTTCAACGAGGCGCCATTGTCTATCAAAAATCAGTAGGGCAACAAGCGGTTACGGATTCCACGCCGATTAAGCCTGAGCATATTTTTGATTTGGCTTCCGTGACTAAAATTTCAGCTACCACGGTGGCAGTAATTAAATTAGTCGAAGAGGGAAAGTTGAAATTATCAGGACAACTCAAAGATTATCTGCCTTGGGTTAAGGGATCAGACAAAGAATCATTGAATATAAAAGACATTTTATTGCACCAGGCCGGATTAGTTCCTTTCATTCCATTCTATAAAGAAACCATCGACGCAACGGGCAACCCCGATACG
>HAA9FADXX_s1_1_GSLv3-7_02_SL76113_(paired)_contig_75183_Average_coverage:_2.82_trimmed	Lake Erie 2014	1.71e-09	31.37	49.02	AGTGCCGAGGAAATTATCAAGCGGGTGCGTTACCTACCCCCTGCCTACAACTTCCGGGCAGGCTACGGATACAGCAACCTCATGTACATCACGGCTGGCGAAGTAATTCGGAAAGTTACGGGCAAGAGTTGGGGCGAGTTTGTTACCGAACGCTTTCTGAAGCCACTGGGCATGACGCGCAGTGTACCCGGTACCACGTATCTGAAAAATATGGCCAACGTGGCTACGCCACACGAACTGGCAAACAACCAGAACCAACCAACACCCTGGGTTGATTGGGAGAACATCGGAGCCACGGGTGGACTGATTTCCAGTGTGAACGATCTATCGCAGTGG
>HAA9FADXX_s1_1_GSLv3-7_03_SL76114_(paired)_contig_36398_Average_coverage:_4.77_trimmed	Lake Erie 2014	2.51e-21	29.01	48.15	CAAAAAGCGGATGCCATCGTCAATGACTTCATGCAGAAAAACAAGATTCCTGGACTTGTTCTGGGGGTCGTTAAAAATGGAAAAATTGTCGTTGAAAAAGGTTGCGGGGTAATATCTCTTGATTCAGGGATGATCCCTAATGAAAACACTATTTTTAATATCGGTTCAGTTTCAAAACCTCTCACAGCTTTCGGCATCATGTATCTCGTCGATCAGGGGAAGCTAAGACTTGATGATGTCGCCAGTCAATACATCCCGAATCTGCCACCAAGCTGGCGGAAAACTACCATTCGGCAGTTCATGTCTCATCAGAGCGGCATACCCCAGTTTAAGCGTAATCTGCCAACATTTAACGAGATGCTCGCCAGCTCCAACAATCTTCCTTTAACCTTTGCACCG…
>HAA9FADXX_s1_1_GSLv3-7_03_SL76114_(paired)_contig_68544_Average_coverage:_3.63_trimmed	Lake Erie 2014	6.23e-06	27.5	49.17	CACTCGTTTGCCATTATAGATTCCTCCATTCAATAACATTTGCAGAAAGATGGCATAATCTTCAATGGTTGAGGAAAGACCTGCTCCTCCTGAGTAATACGTGCTACCCTCCAGTGGATAATCGGGTGTAATGGTTCGGCCGTTAAGCATATTGCCAGAGGACTTCTCTAGTTTTCCTCCTGGTAATTCACGATAAAGTTTTACCAAGCGAGTTGCTTTTGCAGCGGGTAAGTGAAAGTGTGTGTCATTCATTCCCAGTGGCTCAAATATTTTTTCTTTAAAAAATTGATCTAATGTTTTGCCGGAAATCTGTTCTACTAAGCAACCCAACAAGTCTGAGTT
>HAA9FADXX_s1_1_GSLv3-7_04_SL76115_(paired)_contig_20879_Average_coverage:_6.07_trimmed	Lake Erie 2014	1.39e-25	29.15	48.43	GGTCATGTGCTTTTTGAGCATTACGCTGGTTTTACGGACTACCCTAAAAAAATACAACCGCTGCAAGAGGATAGCCCCTTACATATCGCATCGACAAGTAAAACTTTCACAGCCATTGCGATTCTCCAATTGGTACAGCAACAGAAAATCTCTTTAGACGACACCCTTGAACTATTTTTTGAAAAATGGCCATATCCCGGAGTCACTATCAAACAGTTACTGACACACCGCAGCGGTTTGCCTAACTATACTTATTTTATGGAGGCAGATAAGCAGGGGAAATTAGCCTACACAAACAAGGATATCATCGATTGGATGATCCAACACAAACCAGCACCGCATGCACGCCCCGATTCACGTTTTGAATACTGTAATACAAATTATTTACTATTAGCCACG…
>HAA9FADXX_s1_1_GSLv3-7_04_SL76115_(paired)_contig_2401_Average_coverage:_13.66_trimmed	Lake Erie 2014	2.08e-23	26.39	43.4	CAAAAAGCGGATGCCATCGTCAATGACTTCATGCAGAAAAACAAGATTCCTGGACTTGTTCTGGGGGTCGTTAAAAATGGAAAAATTGTCGTTGAAAAAGGTTGCGGGGTAATATCTCTTGATTCAGGGATGATCCCTAATGAAAACACTATTTTTAATATCGGTTCAGTTTCAAAACCTCTCACAGCTTTCGGCATCATGTATCTCGTCGATCAGGGGAAGCTAAGACTTGATGATGTCGCCAGTCAATACATCCCGAATCTGCCACCAAGCTGGCGGAAAACTACCATTCGGCAGTTCATGTCTCATCAGAGCGGCATACCCCAGTTTAAGCGTAATCTGCCAACATTTAACGAGATGCTCGCCAGCTCCAACAATCTTCCTTTAACCTTTGCACCG…
>HAA9FADXX_s1_1_GSLv3-7_04_SL76115_(paired)_contig_49140_Average_coverage:_4.40_trimmed	Lake Erie 2014	1.6e-13	25.53	42.55	CACTCGTTTGCCATTATAGATTCCTCCATTCAATAACATTTGCAGAAAGATGGCATAATCTTCAATGGTTGAGGAAAGACCTGCTCCTCCTGAGTAATACGTGCTACCCTCCAGTGGATAATCGGGTGTAATGGTTCGGCCGTTAAGCATATTGCCAGAGGACTTCTCTAGTTTTCCTCCTGGTAATTCACGATAAAGTTTTACCAAGCGAGTTGCTTTTGCAGCGGGTAAGTGAAAGTGTGTGTCATTCATTCCCAGTGGCTCAAATATTTTTTCTTTAAAAAATTGATCTAATGTTTTGCCGGAAATCTGTTCTACTAAGCAACCCAACAAGTCTGAGTTTAAGCCATAGGTCCATCGCTCTCCAGGCTGATGCATGAGTGGAAGTTTGCCCAATCG…
>HAA9FADXX_s1_1_GSLv3-7_04_SL76115_(paired)_contig_52942_Average_coverage:_3.70_trimmed	Lake Erie 2014	7.09e-07	32.93	47.56	GTAAAAAATGGACTCCCCGGCATTTCGCTCTTAGTAGAAGATTCAAATGGCCGCTTCACAGGAACAGCAGGAATGGCTGACATTGCAGGAGGAGTACCGTTTACCAGTTGCCATGTATCCAAGGCTGCCAGCATCACCAAATTGATGACCGGAACCCTTGCGCTCATGTTGCAGGAAAAAGGTATTCTGGACCTTGACGATCCTCTTTCCAAATACATTGACGGCAAGGTGCTGGAGCAACTTGAAAATGCTAAAGACAAGACAATACGTCATTGCCTTAATCACACCACAGGTATTTACGAT
>HAA9FADXX_s1_1_GSLv3-7_04_SL76115_(paired)_contig_61798_Average_coverage:_2.06_trimmed	Lake Erie 2014	6.39e-12	31.18	54.22	CGGAGTTGAGTCTTTTATGGTCTGTGACCAAAAGGGCAAGAATGGCCATAGGCCCGCCTGATGAGTTAGGATGTCTTTGATTGTGAAGTCTTTCTTATTTGATTCTCTGAGTTCAGGGAGGTAGACCGATATTTTTTTGTTGATATCAATCAATCTTTTTTCGTGCATGAACATCACTGTCTGTAGTGTGGCGGAAACTTTGGTAACCGAGGCCAAATCGTAAATCGTCTCATCATTAACCGGCTCCTTTTTGTCATAAGTAAACCATCCTGCACTTTCTTCATAAACGATTTTGCCGTTTCGCGCTATCAACACCTGGCAGCCCGG
>HAA9FADXX_s1_1_GSLv3-7_04_SL76115_(paired)_contig_68131_Average_coverage:_2.52_trimmed	Lake Erie 2014	2.22e-14	50.67	66.67	GTCTGGCTCGCGCTTACATCGTGCAGCCGAAAGCAGGATCCGCTGCCATGGCGGTTGGACACCTACCTTCAGGCGGCCCAGCAGCATGAGCAGTTTCAAGGGTCAGTGTTGGTGGCAACAGGTGATCGGATCGAATACGGGCGGCAGGTTGGGTATGCTGATATCGGGACCAAAGGGTTGATTGATGCCGAAACGATGTTTGAACTGGCCTCGGTATCGAAACAGTTTACGGCAACGGGTGTACTCATTCTGGCGGAGCGTGGAAAACTCTCACTCAGCGATTCATTGCGACATTTTTTTCCCGATTTGCCCTACACGGGTGTCACGTTGCATCACTTGCTTACGCACACCTCCGGGTTGCCGGATTATGAAGAACTGGCTTACGAAAAGTGGGATCAT…
>HAA9FADXX_s1_1_GSLv3-7_04_SL76115_(paired)_contig_85346_Average_coverage:_2.07_trimmed	Lake Erie 2014	3.45e-15	35.54	56.64	CTATCGCTCCAAAATTTGATCAGCCACAGCAGCGGCTTGCCCGATTATTTTTACTTTAACATGAAGGCTTGGGAGAATCCTAAGGATCATCTAACCAACGATGATGTGGTTCAATTGCTCAATGCCCAGCCAGTGAATCACTTTGCCAAACCAGGCCGTTACGATTACTGCAACAGCAATTATGCGCTGTTGGCGTTGATTGTGGAGCGTCAGACGGGTATGGATTTTAGGGAGTTTGTGAAGTTGCGCATCATGAATCCCAGTGGCATGAAATATTCGCACTTGGCCAATTTTGATACGTTGGGGTTGGTGAATTATACGGTGCAGGGCTATGATAAAAAACGCGTATTTGCAGACAATATCTTC
>HAA9FADXX_s1_1_GSLv3-7_05_SL76116_(paired)_contig_4850_Average_coverage:_8.23_trimmed	Lake Erie 2014	1.17e-23	25.93	43.05	CCTACCGGGATTGTTAACACTATTAAAATTGTAAAGAAAGATTACGGCATGATCCCGATCGGGGACAAATAAAAACGTACTTCTGTACCCTTTTGCCGAGCCATTTTTTGAAACAACTTCCACTCCCCCCAAATAGTTAATCATCCAGCCTGGAGAGCCAGGAAGGTTCGGTTGGGTAGGCTCCAACATCTGGCGGTAACTGGCAGGACTGAGGAGTTTATTCTTGCGGATGGCATTGTAGAATTTGAGCAGGTCACCAAGAGTTGACTGCATGAATCCTGAAGGGATGTTGTAAAGTCCGCCAGGTGGCATTACTTGGTCAACGGGCAGTAATTGCCCATTTCTATCAGCATTTATGTATCCAGTCGCTGTATTGGCATCTCTAAGTCCAAATCCTGT…
>HAA9FADXX_s1_1_GSLv3-7_06_SL75764_(paired)_contig_20968_Average_coverage:_9.89_trimmed	Lake Erie 2014	2.08e-23	26.39	43.4	CAAAAAGCGGATGCCATCGTCAATGACTTCATGCAGAAAAACAAGATTCCTGGACTTGTTCTGGGGGTCGTTAAAAATGGAAAAATTGTCGTTGAAAAAGGTTGCGGGGTAATATCTCTTGATTCAGGGATGATCCCTAATGAAAACACTATTTTTAATATCGGTTCAGTTTCAAAACCTCTCACAGCTTTCGGCATCATGTATCTCGTCGATCAGGGGAAGCTAAGACTTGATGATGTCGCCAGTCAATACATCCCGAATCTGCCACCAAGCTGGCGGAAAACTACCATTCGGCAGTTCATGTCTCATCAGAGCGGCATACCCCAGTTTAAGCGTAATCTGCCAACATTTAACGAGATGCTCGCCAGCTCCAACAATCTTCCTTTAACCTTTGCACCG…
>HAA9FADXX_s1_1_GSLv3-7_07_SL75765_(paired)_contig_24775_Average_coverage:_5.86_trimmed	Lake Erie 2014	5.93e-16	28.79	50	ACTATTTTTAATATCGGTTCAGTTTCAAAACCTCTCACAGCTTTCGGCATCATGTATCTCGTCGATCAGGGGAAGCTAAGACTTGATGATGTCGCCAGTCAATACATCCCGAATCTGCCACCAAGCTGGCGGAAAACTACCATTCGGCAGTTCATGTCTCATCAGAGCGGCATACCCCAGTTTAAGCGTAATCTGCCAACATTTAACGAGATGCTCGCCAGCTCCAACAATCTTCCTTTAACCTTTGCACCGGGGACGAGAAATGAATATAACAACTTTAATTATGTGGTGATCGGAAAAGTTATCGAAATTGTGAGCGGACAACCCTACCTAGATTTCATGCGGCAAAAAATATTCTTGCCG
>HAA9FADXX_s1_1_GSLv3-7_08_SL75766_(paired)_contig_11903_Average_coverage:_26.82_trimmed	Lake Erie 2014	2.08e-23	26.39	43.4	ATTGTAAAGAAAGATTACGGCATGATCCCGATCGGGGACAAATAAAAACGTACTTCTGTACCCTTTTGCCGAGCCATTTTTTGAAACAACTTCCACTCCCCCCAAATAGTTAATCATCCAGCCTGGAGAGCCAGGAAGGTTCGGTTGGGTAGGCTCCAACATCTGGCGGTAACTGGCAGGACTGAGGAGTTTATTCTTGCGGATGGCATTGTAGAATTTGAGCAGGTCACCAAGAGTTGACTGCATGAATCCTGAAGGGATGTTGTAAAGTCCGCCAGGTGGCATTACTTGGTCAACGGGCAGTAATTGCCCATTTCTATCAGCATTTATGTATCCAGTCGCTGTATTGGCATCTCTAAGTCCAAATCCTGTGCGGGTCATACCCAGCGGCAAGAATAT…
>HAA9FADXX_s1_1_GSLv3-7_09_SL75767_(paired)_contig_34561_Average_coverage:_9.48_trimmed	Lake Erie 2014	7.35e-08	40.48	57.14	GGTCATGCCCGTCGGAACCTTCAGCCGGCTCGTGGTGAACTGGTTGTAAGTGACCCCAACGGCGTTCTCGACAATCTTCTCCATCAGGGTATAGGGCGCGTTGTGATAGGCCCAGCGCGTTCCGGGTGCTGACTTATAGGTAAGGCAGGAAGGCAGGGTGCAATCGTCGTCGGCCACAGCGTCATCGAGTCCGGTGGTCATCGTGAGGTGATGGCGCACGTTGATAGCGGCTTCCTGAGTGGCGGTCAGGGAAGACCAGCCTTTGCCGAGGTAACGCGCACTCGTGTCGGTGATGCGCAGCTTGCCTTCCTCCTGCGCCAGTCCGGCAAGAAAGGTCGTAAGTGTTTTGCCTGCCGAAGC
>HAA9FADXX_s1_1_GSLv3-7_09_SL75767_(paired)_contig_40739_Average_coverage:_3.34_trimmed	Lake Erie 2014	3.07e-23	45.74	64.04	CGCGTCCCCGGGATGGCCGTGGCCGTGGTGCGGCGCGGTGAGGTGCTCGCGGCGCGTGGCTACGGGGTGGAAGAGCTCGAGCATCGCACGCCGGTGTCCGATGAGACGATGTTCCAGTCGGGGTCGCTGGGGAAGCAGTTCACCGCGGCCGGAGTGCTGGCGCTGGTGGAGGACGGACGTCTCGCGCTGGACAGCTCGGTGCGCCACTACCTCCCCCAGGTCCCTGCCAGCTGGCAACCCATCACCCTCCGCCACCTGCTCAGCCACCGCGGTGGCATCCCCGACTACACCAGCGAAGGATTCGACTACCGCAAGGAC
>HAA9FADXX_s1_1_GSLv3-7_09_SL75767_(paired)_contig_41001_Average_coverage:_4.06_trimmed	Lake Erie 2014	4.05e-10	36.84	50.59	AATACCGGTGCGGTGCATGAGCAAATCGCGGAGGCTGACCAGTTCGAGATTGGCTACCCTCTTGCGTTGATCGGCAGTGAAATACGCAGCGACTGGAGCCTCGAGGTCAAGCAGTCCCTGTTCGGCCAGACGGAATACCGATGTGGCCAGGAAGGGTTTCGTGACACTGCCGAGCTTGCTCACCGTGCAGGGCGTGAAGTTGATACCTCCGCGGATATCGGCGAGCCCGGCGGCACCGGTGTAAATACCGCGGCCATCTTCCACCCGCACGGCAATGCCGGGGAGGCCGAGGCGGATGTATTTCTGCAAGAGCGCTTCATACTGTGCTGCCTCCGGATGCGGCGCAGC
>HAA9FADXX_s1_1_GSLv3-7_09_SL75767_(paired)_contig_43691_Average_coverage:_2.89_trimmed	Lake Erie 2014	4.25e-07	28.79	40.91	GGACAGGCACTCGTCGTGATGCATCGCGGTCGCGTCATCCATGAGGTGTACCGCGCCGGCGGCAACGCGGGGCGTCGGCAGCTGCTGGCCAGCGGCAGCAAGAGTCTCGTGGGGGTGGCCACCCTGGCCGCCGTGGCCGATGGCCTCGTTCGCCTTGACCAGCCTGTCGCGGCGTACCTACCCGACTGGAACGCCGACCCGCGCAAGGCCGCCGTCACGGTACGCCAACTACTGTCTCTCGAAAGCGGCGTGGAAGCCGGGAATCCCGCGACCGGCTGCGGCGGGCCGAGCGCCACGTGGAACGATGCCGTGCAGGCGCCGGCCATCGCCGACCCCGGGACGCAGTTCCGGTATGGCCCGTTTCCGTTCATCACCATGGGGGCGGTGATGGAGCGGGTG…
>HAA9FADXX_s1_1_GSLv3-7_09_SL75767_(paired)_contig_48542_Average_coverage:_2.61_trimmed	Lake Erie 2014	3.67e-08	29.67	52.29	CTCCATACCCAAGGGCGTCCAGATTTTCCGTTGCAGGTATGCCGTAATGGTTTCGCCTTTCAGCACCCTTTCCAGCACAAGACCCAACATCTCGGTCGAACCACTTACGTATTCCCATTGTTGCCCTGGGGGGCGTTTGGTTTTTAGATCAAGGATGCGCTCTCTCAGATTGCGGCCATAATAAAAAGAAGCTGCCTCAGTGAAGGGCGAATAATAGCCTTCGTCGAAGTCCATTCCCGAAGTCATGTTCAGCAAATGGCGCAGACTTACCTGGTTCCAGGATGGGTCTTTTAAATCTGGTAAGTATTTGGTCAC
>HAA9FADXX_s1_1_GSLv3-7_09_SL75767_(paired)_contig_48741_Average_coverage:_3.17_trimmed	Lake Erie 2014	3.27e-12	32.41	50.93	GTGTGGCGCGGCGTGGCGGGGCTCTCCGCTCCGGGAGTGCCGATGGACACGGCCATGCGCCTCGGCATTGGCAGCATCTCCAAGTCCATCACCGCCACGCTGCTCGTGCGTCTCGCGGAGCGCGGCCGGCTCACGCTGGATGATCCGGTGGGACGATGGCTACCGCCCATCGCGCATGTCGATCCGGCGATTACGGTGCGGCAGCTGCTCAACCACAGTAGTGGTGTCTTCGACATCACCGACGCGCCGGGCTACCGGGACTCCATTCTCGCCAATACCAGCGCGCGCTGGACGCCGCAGCGGACGCTCGCGCTGCTGCGCCCACCGCTCTTTCCGCGCGGGACGGGGTGGAGCTACTCCAACTCC
>HAA9FADXX_s1_1_GSLv3-7_10_SL75768_(paired)_contig_11325_Average_coverage:_12.49_trimmed	Lake Erie 2014	4.15e-21	29.94	50.31	TTCAAAAACGACAGCATGGTGAAAGGCAAAGTTGGATTTGCCAATTTCAAGACCCGCGACACGTTGTTGCCAGACGACTTATTCCAGTTGGCCAGTGTAAGCAAGACTATTACCGGTACGGCCGTAATGACCTTGTACCAGGAAGGCCGCATCACTCTTGAAGACAGCGTGCATTGGTACCTTCCAGAACTGAAACGACACAACCTGACCCTGCGGCATTTGCTGACCCATACCAGTGGCCTGCCGGATTATTTCAACTTCAGCGACCAATACTGGCCCGACAAATCGCAGCACATGGAGAATGGCGATATCATCCGCATGCTGAACAAGCTGCACTACACGCATTTCCGCAAACCGGGCAGCATATACGATTACTGCAATACCAATTTCGTGTTGCTC…
>HAA9FADXX_s1_1_GSLv3-7_10_SL75768_(paired)_contig_14513_Average_coverage:_4.35_trimmed	Lake Erie 2014	7.3e-13	25.29	43.68	ACGGATTCCACGCCCATTAAGCCTGAGCATATTTTTGATTTGGCTTCCGTGACTAAAATTTCAGCCACCACCGTGGCAGTAATGAAATTAGTCGAAGAGGGAAAGTTGAAATTATCAGGACAACTCAAAGATTATCTGCCTTGGGTTAAGGGATCAGACAAAGAATCATTGAATATAAAAGACATTTTATTGCACCAGGCCGGTTTAGTTCCTTTCATTCCATTCTATAAAGAAACCATCGACGCAACGGGCAACCCCGATACGAGTTTGTACGCTACGGTAGCTAAAAAAGGATTCACCGTGCGGGTTGCAGAAAATTTATACCGGAGAGACGATTGGAAAGACACCCTGCTTGCACGTATTTTAAAAAGTCCGCTGGGGCCACAAGGCAAATATGTT…
>HAA9FADXX_s1_1_GSLv3-7_10_SL75768_(paired)_contig_20745_Average_coverage:_5.54_trimmed	Lake Erie 2014	2.3e-32	34.94	57.23	GGCAGCATCCCATTTCAGCAAATCGTTGGTCGTAGAGCTGATTCTGCCCGGGCCTTCCCGGTGACCGAGCCAGATGGTGTAGTTGGAAGAAGGGAAGGAGTCAGCCGGTAAAAAAATAGTTTGGCTGCTGTCGGCGATATGTCCTCTTGCAAAATGAGGAATGGCCGATCTTTCAGCGGGCGTACGCAGGTCGGTATCTTTCATGCCCAGGGGTTGAAAGATATCTGTGCGGCAGATCTCAGTAAAATCACGCCCCGATGCTTTTTCTGCAATGCTCGCGAGTAGTACATAGCCGGTATTGCTGTATTCGTATTGGCTGCCTGCCACAAATCGGGTGGGAGGTGCATAGCGCCTGAGGTAAGCGAGTATGTCGTCATTGTTCGCCACCTTCGATTTGTC…
>HAA9FADXX_s1_1_GSLv3-7_10_SL75768_(paired)_contig_24182_Average_coverage:_10.46_trimmed	Lake Erie 2014	2.51e-21	29.01	48.15	CAAAAAGCGGATGCCATCGTCAATGACTTCATGCAGAAAAACAAGATTCCTGGACTTGTTCTGGGGGTCGTTAAAAATGGAAAAATTGTCGTTGAAAAAGGTTGCGGGGTAATATCTCTTGATTCAGGGATGATCCCTAATGAAAACACTATTTTTAATATCGGTTCAGTTTCAAAACCTCTCACAGCTTTCGGCATCATGTATCTCGTCGATCAGGGGAAGCTAAGACTTGATGATGTCGCCAGTCAATACATCCCGAATCTGCCACCAAGCTGGCGGAAAACTACCATTCGGCAGTTCATGTCTCATCAGAGCGGCATACCCCAGTTTAAGCGTAATCTGCCAACATTTAACGAGATGCTCGCCAGCTCCAACAATCTTCCTTTAACCTTTGCACCG…
>HAA9FADXX_s1_1_GSLv3-7_10_SL75768_(paired)_contig_2982_Average_coverage:_6.01_trimmed	Lake Erie 2014	5.2e-19	32	47	GTTGGTCAGCAGGATGAAGCCCAGATTCTCTTCTGGCAACATTTGAATCACGGATACCATACCATCATAACCTCCGGTGTGGCCTACCCGCAGGCGGCCGTGATAATCGGAGAGTCCCCAGCCGAGGCCATACCCGCGAAAATGGGTGGCCGGATTTTTTGCGGTGTGATCCACCACAAAATTGTTATGGGGTGTCCATAGTATGTTTCGGGAGGCAGCCGTGAGGAGCGTATCCTTACCCCAGATGCCGTGGTTCATATTGAAGATTAACCACTGCGATAGATCGTTCACACTGGAAATCAGTCCACCCGTGGCTCCGATGTTCTCCCAATCAACCCAGGGTGTTGGTTGGTTCTGGTTGTTTGCCAGTTCGTGTGGCGTAGCCACGTTGGCCATATT…
>HAA9FADXX_s1_1_GSLv3-7_10_SL75768_(paired)_contig_3841_Average_coverage:_12.76_trimmed	Lake Erie 2014	1.14e-08	29.91	49.65	ACCCTGAGTCAGATCAACAACGACAACGACAGCCGGGCTTTTCTGGTAATCCGCAACGACAGCATTCTCTATGAAGGCTATTTCAAAGGTTATGCAGACAGCAATGCTGTCCCTTCCTTTTCCATGGCAAAATCGTTTACTTCGGCATTAATTGGTTGTGCCATTGCAGACGGATTGATCGGCAGTGCTGACGACAAGGTGACCAAATACTTACCAGATTTAAAAGACCCATCCTGGAACCAGGTAAGTCTGCGCCATTTGCTAAACATGACTTCGGGAATGGACTTCGACGAAGGCTATTATTCGCCCTTCACTGAGGCTGCTTCTTTTTATTATGGCCGCAATCTGAGAGAGCGCATCCTTGATCTAAAAACCAAACGCCCCCCAGGGCAACAATGG…
>HAA9FADXX_s1_1_GSLv3-7_10_SL75768_(paired)_contig_45261_Average_coverage:_3.52_trimmed	Lake Erie 2014	2.63e-17	29.41	47.65	AAGGTGAGCGGGGAAGATTTTGCCGGTTATTTGCGCAGGCATATTTTTCAGCCACTCGGGATGTATGCAACAATTGCGTTCGAGGAAGGTAAGAGTCGTGTCAAGAACAGGGCATTGGGTCATTCCCGAACAGGGAATGGTTGGAAGGTCACAGATCAAAGTCTTACCAGTGCTGTATTGGGTGATGGTGGTATTTATACCAATGTATTGGATTATAGTCGATGGATCACTGCACTTTTGGAATACAGGCTTATTCCGGATACCGTACAGCAAGTTGCATGGCAAAGAGCAAGAGTAGACAATGGATCACCGGTCAACTATGGATTTGGCTGGCACGTTGATGAAATTCGTGGCAGGTTTCTCCCACATCATTCCGGCAGTAGCATAGGTTTCAGGAAT…
>HAA9FADXX_s1_1_GSLv3-7_10_SL75768_(paired)_contig_5566_Average_coverage:_3.84_trimmed	Lake Erie 2014	2.83e-22	31.25	51.14	AACATAGGAAGCTGTATCCCTGCTACTAAAAACAAAACTGTTCTGCATCCCGAGGGGGGTAAACAAACTGTCTTTCAGGTACTCGGGATAAGTTCTTCCTGTTACCTTCTCAATTACCATCGCTAAGAGAACATAATTGGTATTGCAATATTGATAACGGCTATCGGGAGCATAAGTTACCGGAACTTTGTAGCGCATCATATAATCAACCACATCTCTGTTGGTGGCCAACCCCTTGAACCGATTGGGGTCTGCGTAATATACTTTTCGGGTGTACCACTTGCCCCGCTTGTTTTTCGATCTCACCAACCGGTACCCTGTTTCATTCATAAAATATTCATACTTGGGCAAACCGCTGCGGTGATTGAGTAGTAATTGTAGCCGGATACCCTTGTAAGG…
>HAA9FADXX_s1_1_GSLv3-7_10_SL75768_(paired)_contig_64628_Average_coverage:_5.76_trimmed	Lake Erie 2014	6.22e-10	28.86	44.97	GTGATGATGCTGTTTGAAGAGGGTAAGTTTCTTTTGGATGATCCAGTGTCGAAATACGTTCCGGAATTCCGAAATCCCAAATTGTTGGTTAATCTGAATTGGGCAGACACCACGTACACCACCACCCCCGCCAAGAGTGAGGTTACGATCCGTCAACTGCTCACCCATAGCTCGGGTATTGATTATGCGAGCATCGGCAGTCAGGAGTTCAAAGCTATCTATGCCAAGGCGGGCGTGCCCAGCGGCATCGGCACCGATAACATGGTGCTGGCCGAAAAGATGAAAATACTTGCTGGTCTCCCACTCAGGCACCAACCGGGCGAGCAGTACACCTACGGATTAAACACCGATGTGTTGGGCTACCTGGTGGAGGTTCTTTCGGGCCTTCCGTTGGATCAG…
>HAA9FADXX_s1_1_GSLv3-7_10_SL75768_(paired)_contig_65878_Average_coverage:_5.03_trimmed	Lake Erie 2014	1.8e-06	24.49	41.84	GTTCACGGCATGGTGTACCAAGACGGAAAGGTAGTATATGATCAGTTCTACGGCTTACGAGACAAGGAAGCTGCAGCTGCCATGCAAGGGGACGAACTCTTTTTTATCCAGTCCATGACCAAGCCCATCGTATCGGTGGCCTTGATGACGCTGTACGATCAGGGCAAATTCCAATTGGACGAGCCCATCTCTAAGTACCTCCCAGAGTTTGCGGCGATGCAGGTAGTGAACGATCCGACCATCGGCTCCTCCTCCGGCACCCATGCAGCCCCTTCGCCCATGACCATTCGCCAGGTGCTCAGCCATACCTCAGGCATG
>HAA9FADXX_s1_1_GSLv3-7_10_SL75768_(paired)_contig_69172_Average_coverage:_3.94_trimmed	Lake Erie 2014	3.02e-06	24.76	46.67	TTTTGCACCAATTACTTGCCAGACGTTCTCACTAAAGTAATCAGCAACTTTCTTACCAGTTACTTTCTTAATTATCATTCCTAGCATTTGAGTATCAACACTGCGGTATTCAGATTTCGTACCTGGATCAAAAGCCATTTTTCTATTATTTTTTAGAAACCATTCAAGGTCGGTAGTGGCATACATTTGTGCAATAGCTACACCCCAGCCAGAGGGCCCTGATGGATAATTATCACTTACGCCAACGCCAGCCTGCATATCTAGTAGTTGTTTAATTGTGACTAAATCAAAACTGGTGCCAGCTTTTAAATCAGGGAAGTA
>HAA9FADXX_s1_1_GSLv3-7_10_SL75768_(paired)_contig_72752_Average_coverage:_5.33_trimmed	Lake Erie 2014	1.72e-10	24.51	37.94	AATATTTCTTTGTAAAAAAGCTTGATCTATTTTCATATAGTTTGATGCTGAACTTATGTAAATATCAAGACTTGGAATATAGCAAAGCATTGAACCATAGCCAAAGGCAGTTCCGGTATGACCGAAACCATAAATTGGACCATTGTTAAAACTATTGAATTGCATCATACCGTGTCCGTATGAACCCATTTCTCCTGTAATGGTTACAACTGATTTCATTGTATCAAGCCAACTTGCATTAATTATTTGTCCACCAAAAAGTGCTTTATGAAATTTAATCAGGTCTGTTGTATTGGACCAAATGTCGGCAGCACCATAACCCCAAGAATTGTTTGCATCAGTAAAATCATATAAAGAGTCAGGGTTTAGTCCGATATTTTGAGGTAAAACAACATCGCT…
>HAA9FADXX_s1_1_GSLv3-7_10_SL75768_(paired)_contig_76937_Average_coverage:_3.38_trimmed	Lake Erie 2014	1.33e-11	27.37	42.11	CAACTTTACTAACCTCTGCATCGCTTCGGCGTTATTTGCATTTAATAACAGTATGTGTCCTACCCCATGTTCAGGAAGATATGCTAATTGAGAAAGACCACCGTCCATAGCACCATCATGCCCATGATAGACAAATCCGTTGTAAATGGACGTAAAGTTTCCCAAACCGTAGCCTAACTCTAGTCCTGCTTGCGCTCCAGGAGTGCTTTGCGATACTTCCATCCTTAAGATCGACTTCTCATCAAAAAGATTTAAGGAATCAATTGACCCTCGATAAAGCAATAATTTTAGAATCTGGGCCAGATCTTTCGGTGATGAATTCATTGCACCAGAAGGTCGATAAAGCTCATTTTTATAGGCAACCTTTTTCATGGCCCAATTGTAGGTTTCAGCACCCCA…
>HAA9FADXX_s1_1_GSLv3-7_10_SL75768_(paired)_contig_86145_Average_coverage:_3.45_trimmed	Lake Erie 2014	1.14e-10	27.35	41.88	GGTATTTACTCCTGCGCTGAGGACCTGCTCACCTGGGATCAGGCGCTTTACACTGGTAAACTGGCCAGCACGGCTGCACTCAGGGAGCTCTTCAGTCCCGGGAAACTCAACGACGGAACGCCGGTCAATTACGGCTTCGGCTGGTTTGTTGACTCCACTTCCCGGAAAGTGTATCACACCGGTAGCTGGCTGGGGTTCAAAAATCTCATAGAACGGTATCCCGACTCGAAAACTACCGTCATCCTGCTCAGCAACTCAACTGATGGTACCGCCCGCGACGCAGTCAGGGCGCTGTTGAACGGGAAATCTCCCCAAATCCCGCACTCGCAACTGATACGCAATGTG
>HAA9FADXX_s1_1_GSLv3-7_10_SL75768_(paired)_contig_96908_Average_coverage:_4.95_trimmed	Lake Erie 2014	1.56e-14	48.39	66.13	GGGCAAATCGGGAAAAAAATGTCGCAATGAATCGCTGAGTGAGAGTTTTCCACGCTCCGCCAGAATGAGTACACCCGTTGCCGTAAACTGTTTCGATACCGAGGCCAGTTCAAACATCGTTTCGGCATCAATCAACCCTTTGGTCCCGATATCAGCATACCCAACCTGCCGCTCGTATTCGATCCGATCACCTGTTGCCACCAACACTGACCCTTGAAACTGCTCATGCTGCTGGGCCGCCTGAAGGTAGGTGTCCAACCGCCATGGCAGCGGATCCTGCTTTCGGCTGCACGATGTAAGCGCGAGCCAGAC
>HAA9FADXX_s1_1_GSLv3-7_11_SL75769_(paired)_contig_31579_Average_coverage:_10.20_trimmed	Lake Erie 2014	2.08e-23	26.39	43.4	CAAAAAGCGGATGCCATCGTCAATGACTTCATGCAGAAAAACAAGATTCCTGGACTTGTTCTGGGGGTCGTTAAAAATGGAAAAATTGTCGTTGAAAAAGGTTGCGGGGTAATATCTCTTGATTCAGGGATGATCCCTAATGAAAACACTATTTTTAATATCGGTTCAGTTTCAAAACCTCTCACAGCTTTCGGCATCATGTATCTCGTCGATCAGGGGAAGCTAAGACTTGATGATGTCGCCAGTCAATACATCCCGAATCTGCCACCAAGCTGGCGGAAAACTACCATTCGGCAGTTCATGTCTCATCAGAGCGGCATACCCCAGTTTAAGCGTAATCTGCCAACATTTAACGAGATGCTCGCCAGCTCCAACAATCTTCCTTTAACCTTTGCACCG…
>HAA9FADXX_s1_1_GSLv3-7_11_SL75769_(paired)_contig_35761_Average_coverage:_5.02_trimmed	Lake Erie 2014	9.04e-10	33.98	50.49	CGTATCGTTCATACCCAGGGGCTGAAAAATTCGGTTTCGAAAAAACTGATCCAACGGAAGGCCCGAAAGAACCTCCACCAGGTAGCCCAACACATCGGTGTTTAATCCGTAGGTGTACTGCTCGCCCGGTTGGTGCCTGAGTGGGAGACCAGCAAGTATTTTCATCTTTTCGGCCAGCACCATGTTATCGGTGCCGATGCCGCTGGGCACGCCCGCCTTGGCATAGATAGCTTTGAACTCCTGACTGCCGATGCTCGCATAATCAATACCCGAGCTATGGGTGAGCAGTTGACGGATCGTAAC
>HAA9FADXX_s1_1_GSLv3-7_11_SL75769_(paired)_contig_39884_Average_coverage:_3.79_trimmed	Lake Erie 2014	4.16e-12	48.21	66.07	ATTGCCTGGTAATCGGGTAATCCGGAAGTGTGTGTGAGGAGATGACGAATGGTGATATTTTTATAGGGAATATCCAGGTACTGCTCAACGGGGTCATCGAATTGCAGTTGCCCTTTTTTCCTGCAGAAGCATGATCACCATGGAGGTGAACTGTTTGCTAACGGAAGCCAGTTCGAACAGGTCTGTCTTATTCAGGGGGGTACGAGAAGCGAAATCGCGGTAACCGGTTGTTTTCTGATAAATGATTTTTCCTTCCCGGGCAATGGTGATCACACCGCTGAATTGGTTGTTGGCGAGGAA
>HAA9FADXX_s1_1_GSLv3-7_11_SL75769_(paired)_contig_58647_Average_coverage:_2.62_trimmed	Lake Erie 2014	1.34e-06	26.52	38.64	TTTGGCATCAGGCAAACCGGTTCTTCCGACAGTGTGGATATAAATACAGTTTTCAGGGTTGGTTCTCTGTCCAAGGGGTTCGCCGGAGTACTCACGGGTATTCTGGTGCAGGAAGGATGGATTGGATGGAATGAACACGTCCGCGATTGTTACCCCGAATTCACACTCAGCGATGAAGCACAGGCCCAACGCGTGCAACTCAGACACCTGCTGTCACATACCACCGGACTGCCCTATCACGCATTCACCCACCTGATTGAACGCGGCTATGATACCCGCAAAATAGTATCTGAATACTTCCCGCACGCGCGCCTGAGCGCTCGCGAGGGTGAATACTACAGTTACCAGAACGCGGCATTC
>HAA9FADXX_s1_1_GSLv3-7_11_SL75769_(paired)_contig_60829_Average_coverage:_7.85_trimmed	Lake Erie 2014	3.89e-21	34.39	54.49	TTCAAAAACGACAGCATGGTGAAAGGCAAAGTTGGATTTGCCAATTTCAAGACCCGCGACACGTTGTTGCCAGACGACTTATTCCAGTTGGCCAGTGTAAGCAAGACTATTACCGGTACGGCCGTAATGACCTTGTACCAGGAAGGCCGCATCACTCTTGAAGACAGCGTGCATTGGTACCTTCCAGAACTGAAACGACACAACCTGACCCTGCGGCATTTGCTGACCCATACCAGTGGCCTGCCGGATTATTTCAACTTCAGCGACCAATACTGGCCCGACAAATCGCAGCACATGGAGAATGGCGATATCATCCGCATGCTGAACAAGCTGCACTACACGCATTTCCGCAAACCGGGCAGCATATACGATTACTGCAATACCAATTTTGTGTTGCTC…
>HAA9FADXX_s1_1_GSLv3-7_11_SL75769_(paired)_contig_61631_Average_coverage:_3.03_trimmed	Lake Erie 2014	7.04e-14	27.05	42.51	GATAAATCGCGGGTGGCCTCGAACGCGGACAACATTGCCTATTTGATTCAACATCGTCCGCCACGGAGTTTTGAGCCAGGCACCCGGTACGAATACAGTAACACCGGGTATATGTTGCTGGCGAGTGTGGCCGAACAGGCAAGTGGTCAGGATTTCCTCACCTTGTTACACGAAAGAATTTTTTCGCCTTTGGGCATGACGATGACGAGTGTGCGCACGAAAGCAGAAAAAGATCAACTGCCCAATATGGCCTGGGGGCACATTTGGGTAAACGAGCGAAAGGCCTTTATCAAAGCGGATTCATTTCCTGCCTTTAACTACACGATCTGGCTCGGCAACCGGAAAGGACCCGGGCGGATAAGTTCTACCGCACGCGACATGATACGCTGGGACCGTGCC…
>HAA9FADXX_s1_1_GSLv3-7_11_SL75769_(paired)_contig_71456_Average_coverage:_3.32_trimmed	Lake Erie 2014	1.28e-12	33.33	48.78	CAAACCCGACAGCTATCGGATAGGGATTGTCTCAGATTAATGCATTCCGCCCGTGAATTGTATTTTATACCCGGTTCTGCTTATCGCTACAGCAATACGGGATAAGCTTTGTTGGCGCTTATTGTTCAAAAGGTGAGCGGGGAAGATTTTGCCGGTTATTTGCGCAGGCATATTTTTCAGCCACTCGGGATGTATGCAACAATTGCGTTCGAGGAAGGTAAGAGTCGTGTCAAGAACAGGGCATTGGGTCATTCCCGAACAGCGAATGGATGGAAGGTCACAGATCAAAGTCTTACCAGTGCTGTATTGGGTGATGGTGGTATTTATACCAATGTATTGGATTATAGTCGATGGATCACTGCACTTTTG
>HAA9FADXX_s1_1_GSLv3-7_11_SL75769_(paired)_contig_9290_Average_coverage:_6.91_trimmed	Lake Erie 2014	1.93e-07	29.86	40.28	GAACTGGTCAGCCTCCGCGATTTGCTCATGCACCGCACCGGTATTCCCGACCTCATCGCGCAAAGCACCTATTACCTCGACGTGCTGAACCGGCCGGACGGAAAACGCAGCGCCGAAGACCTGTTGAAATTCGTATACGACTTACCTGCCGATTTTGTACCCCGCAGCCGTGCAGTGTATTCCAATACCAATACGCTGCTCCTTAGCATGGTGGTCGATGCCATCCGCCCCGGCGGGCACGACCACGGCTGGTGGATGCGCAAGCTGGTCTTCGAACCCGTCGGCATGGGCAATACCTGGTACCGCGGCTATGAATCCGTGCCCGGCCGCGTCGCCAAAGGTTATTTCGACCTGTACCAGAACGGCGCGCTCACCGACGTAACCGGTCTCGTTACCGGG…
>HAA9FADXX_s1_1_GSLv3-7_13_SL75771_(paired)_contig_14832_Average_coverage:_4.69_trimmed	Lake Erie 2014	3.96e-26	29.15	48.88	GGCCTGATCCCATTTTAATAAATCGCGTGGAGTGCTATAAATATTTTTATCGCCATAAGTTAAATCGAGATGGTCTAGCGGCCATGATTGCGAAGAATTTACAAAAGAGGGTGTAGCCTTTACTGCATCTGCCGGTTCAAAAACAAATGTATTCTTCATGCCTAAAAAGGTAAAAATAGAACGGCGAAGAAATTCAGGATAAGAGTATCCTGAAGTTTTCTCAATCAACGTGGCTAACAGTAAATAATTTGTATTACAGTATTCAAAACGTGAATCGGGGCGTGCATGCGGTGCTGGTTTGTGTTGGATCATCCAATCGATGATATCCTTGTTTGTGTAGGCTAATTTCCCCTGCTTATCTGCCTCCATAAAATAAGTATAGTTAGGCAAACCACTGCG…
>HAA9FADXX_s1_1_GSLv3-7_13_SL75771_(paired)_contig_29464_Average_coverage:_11.75_trimmed	Lake Erie 2014	1.34e-23	26.01	43.19	ATTATTAAAATTGTAGAGAAAGATTACAGCATGATCTCGATCGGGGACAAATAAAAACGTACTTCTGTACCCTTTTGCCGAGCCATTTTTTGAAACAACTTCCACTCCCCCCAAATAGTTAATCATCCAGCCTGGAGAGCCAGGAAGGTTCGGTTGGGTAGGCTCCAACATCTGGCGGTAACTGGCAGGACTGAGGAGTTTATTCTTGCGGATGGCATTGTAGAATTTGAGCAGGTCACCAAGAGTTGACTGCATGAATCCTGAAGGGATGTTGTAAAGTCCGCCAGGTGGCATTACTTGGTCAACGGGCAGTAATTGCCCATTTCTATCAGCATTTATGTATCCAGTCGCTGTATTGGCATCTCTAAGTCCAAATCCTGTGCGGGTCATACCCAGCGG…
>HAA9FADXX_s1_1_GSLv3-7_13_SL75771_(paired)_contig_47538_Average_coverage:_2.09_trimmed	Lake Erie 2014	1.33e-08	32.35	52.94	GAAATCACCATCCGCCACCTGCTGGCCCATACCAGTGGCTTGCCGGATTATTTCGGCGATGCGCCCAAAGACGGTGTGGCATGGCAAAGCAGGTTGCTGGCGGGGGAAGATTTTCTGTGGACTACCGAAGCGGCCGTGGAACAGAGCCGCCGCATCGCAGCGCATTTCCCGCCAGGAACCGCAAAGCGCGCCCATTATTCCGACACCAATTTCCAGCTGCTGGGACGCATCCTTGAAATCCGCAGCGGCAAAGCACTATCGGAACAATTGGAACTGGAAATCATCCGGCCCCTGGGACTGCAAAACACC
>HAA9FADXX_s1_1_GSLv3-7_13_SL75771_(paired)_contig_49514_Average_coverage:_5.26_trimmed	Lake Erie 2014	8.56e-12	28.16	51.49	CCCGGTGCAGTGGTACTTGCTGTTCAACGAGGCGCCATTGTCTATCAAAAATCAGTAGGGCAACAAGCGGTTACGGATTCCACGCCGATTAAGCCTGAGCATATTTTTGATTTGGCTTCCGTGACTAAAATTTCAGCTACCACGGTGGCAGTAATGAAATTAGTCGAAGAGGGAAAGTTGAAATTATCAGGACAACTCAAAGATTATCTGCCTTGGGTTAAGGGATCAGACAAAGAATCATTGAATATAAAAGACATTTTATTGCACCAGGCCGGTTTAGTTCCTTTCATTCCATTCTATAAAGAAACCATCGACGCAACGGGCAACCCCGATACG
>HAA9FADXX_s1_1_GSLv3-7_15_SL75773_(paired)_contig_10518_Average_coverage:_6.11_trimmed	Lake Erie 2014	1.5e-20	26.67	42.81	ATTGTAAAGAAAGATTACGGCATGATCCCGATCGGGGACAAATAAAAACGTACTTCTGTACCCTTTTGCCGAGCCATTTTTTGAAACAACTTCCACTCCCCCCAAATAGTTAATCATCCAGCCTGGAGAGCCAGGAAGGTTCGGTTGGGTAGGCTCCAACATCTGGCGGTAACTGGCAGGACTGAGGAGTTTATTCTTGCGGATGGCATTGTAGAATTTGAGCAGGTCACCAAGAGTTGACTGCATGAATCCTGAAGGGATGTTGTAAAGTCCGCCAGGGGGCATTACTTGGTCAACGGGCAGTAATTGCCCATTTCTATCAGCATTTATGTATCCAGTCGCTGTATTGGCATCTCTAAGTCCAAATCCTGTGCGGGTCATACCCAGCGGCAAGAATAT…
>T06_1_trimmed_(paired)_contig_29438_trimmed	Taihu 2014	3.79e-07	23.97	40.41	TTTTACTGCAACTTCAGCAATCAAACCCAATAAAATATATCCTGTTTCAGAGTAGAAATAACCTTGTCCTGGTTTAAACAACGCAGGTTTTCCTTCAATAATCGAAATGAACTCGTGAGGTAATAAGCATTTGTCAGGATTTTCTTTAAAATTTTGGTTTTTTATAAATTCGTTAAATTCTGGAATAATAACATGATTGACTAACCCAGAAGAGTGAGTTAAAAGGTGATAAATTGTGATTTCGTCTCTGTTTGGAATGCGATTGAACCACCATTCTTTCCCCAAGTACTGAGAAATCTTATCATTATAATTAATTAAATTTCTGTGTTTTAATAACACAAAAAGCATTCCAACAAAAGTTTTTCCAACAGAACCTGCAAAGAATCTGTTATCGTTGAG…
>T06_1_trimmed_(paired)_contig_50355_trimmed	Taihu 2014	1.82e-12	28.83	52.81	ATAATCATCAATCCCTGATGCCATGTGAATAATATGCTTTAATCTTACAGTTTGATTTACCCCGTTGAATTGAAAAACTGGCAATGCATCTCCCCAGTATGATTTTATGTCATCTTCTGGGCTGATAACTTTTTGTTCAATCAACATTGCAATGGCAAATGCACAAAATTGTTTTGACATACTTGCAATGCTTGTTAATGTATTAGATGCAAAAGGAATGTTAAGTTGAAGATTTGCCATTCCATAACCTTTTTTAAAAATCAATTGTCTCTTGTGGTGCACACCAACTGAACAACCATTTGTTTGGGTGGTGAAAAGCTTGAATAAATCATCAGAAAC
>T06_9_trimmed_(paired)_contig_23349_trimmed	Taihu 2014	1.54e-17	31.52	51.52	GAATGTACCATCGACTTTGTTTTTAATATAACCTTGTGCAATTTTCGGGTCATGAGGAAGTCCTGGTTGATCATCAAGCCAAAATGTGTTTGACATTCCCAAAGGTTTGAAAACATTATCATCAGACCATTTTCTCAACGATTTTCCAGTTTTTAAAAGGACAAGTTCTGCCATTAAGAAATAGTTGGTATTACCATAATCTTGCTTTTCTCCAGGTACAAATTTTAATTTTCCCAAAGTACTTCTTACAACATTCCATACAGTTGTTTGGTTGAAGAATGCTCCATTTGGTAAAACTTGTGTAAGCACTGGAATATAATCTTCAATTCCTGATGCCATGTGAATCAGGTGTTTTAATCTAACAGTTTGATTTACTCCATTGAATTGAAAAACTGGCAA…
>T07_9_trimmed_(paired)_contig_137491_trimmed	Taihu 2014	5.5e-11	31.37	49.02	CGCGCTAAAGAACTCGTAGCACAAGCCTGAGGTATGCAGCAGTAGATCATTGACGGTGATTTTGCGCTTTGGCGCCCGTGTCTTAGGTTGGCCAGATGCGTCAAAGCCATCCAGCACCTGTAGTTCATCAATCTCTGGCACGTATTTGCCAGCCGGATCGTCGAGGCTTAATTTCCCTTCTTCGATCAGCTGCATCGCTACCACCCCGGTCATTGCCTTCGTGGTAGAAAAAATTGCGAATACAGAATCGGTGGTCATCGGCGCGTCTTTACCCAGTTCGCGCACTCCCGCCGCACCCTCGTAAAAATTTGCCAGCCTATCGGTTGCCATCGCCACGACACCCGG
>T07_9_trimmed_(paired)_contig_140541_trimmed	Taihu 2014	2.21e-09	30.63	42.34	GAAGCCGGCTGTGTGCGTGAGCAGGTGACGTGTCGTGATGTCGCGCTTCGGTGGGCGCAGCCTGGGTTGCCCGTCCTTGCCGAAGCCCTCGATGACCATGATGTCGGCAAGTTGGGGCGCGTACTCCTTCGCAGGCGCGTCGAGGTCGAGAAGCCCCTCTTCCACCAGTTGCAAGCAAGCCGTTCCTGCGATGGCCTTAGTGGTCGAAAATATCGCGCACACGGTGTCGGGTTCAAACGACTCGCCGGTTCCGGTGTTGCGGACACCGCGCGCGCCTTCGTAGATCGTGCCGCGGCGGTCGGTCACCGCCGCCGATACCCCGGGCACGCGGGG
>T08_1_trimmed_(paired)_contig_34476_trimmed	Taihu 2014	6.03e-09	31.76	43.24	GCCGAGCGGCACGCGCAGTGCGGCGTCGAAGATCTGCTGCCAGGACTTTCCTGTTGCCACCTCCGCCATGCGACCGGCCACGCGCAGATGGGTGGCGCCGTACCAGTAACGCGCCTTCGGCGGCGCCAGCACACCCGGTTTGCTCTGGCTGTCATGAATCCGCAGCACCGCCTCGGCCAGCGTGATGCTGGTCGCGGTGGCTTCGTCCACGTCGCCCTCCAGGCCGCTGGTGAACGACAGCAGGTCAGAAAGCGTGATTTGGCCTATCGGCCCGCTCCACGGTGCGCCGTTGCGGTCGACCAGCAGATCGCCCGTGCGGGTCGCCAGCGTCAGGGTGCCTTGCTGCACCAGCCGCAGGATGGTCGATCCGGTGACCCATTTGGTGGCCGAGGCGATGGG…
>T08_1_trimmed_(paired)_contig_46158_trimmed	Taihu 2014	6.17e-23	29.1	46.56	GGCATTGTAGAATTTGAGCAGGTCACCAAGAGTTGACTGCATGAATCCTGAAGGGATGTTGTAAAGTCCGCCAGGTGGCATTACTTGGTCAACGGGCAGTAATTGCCCATTTCTATCAGCATTTATGTATCCAGTCGCTGTATTGGCATCTCTAAGTCCAAATCCTGTGCGGGTCATACCCAGCGGCAAGAATATTTTTTGCCGCATGAAATCTAGGTAGGGTTGTCCGCTCACAATTTCGATAACTTTTCCGATCACCACATAATTAAAGTTGTTATATTCATTTCTCGTCCCCGGTGCAAAGGTTAAAGGAAGATTGTTGGAGCTGGCGAGCATCTCGTTAAATGTTGGCAGATTACGCTTAAACTGGGGTATGCCGCTCTGATGAGACATGAACTG…
>T08_2_trimmed_(paired)_contig_46745_trimmed	Taihu 2014	1.06e-08	30.92	42.11	GGTGGAATCCCAGCCGAGCGGCACGCGCAGTGCGGCGTCGAAGATCTGCTGCCAGGACTTTCCTGCTGCCACCTCCGCCATGCGACCGGCCACGCGCAGATGGGTGGCGCCGTACCAGTAACGCGCCTTCGGCGGCGCCAGCACACCCGGTTTGCTCTGGCTGTCATGAATCCGCAGCACCGCCTCGGCCAGCGTGATGCTGGTCGCGGTGGCTTCGTCCACGTCGCCCTCCAGGCCGCTGGTGAACGACAGCAGGTCCGAAAGCGTGATTTGGCCTATCGGCCCGCTCCACGGTGCGCCGTTGCGGTCGACCAGCAGATCGCCCGTGCGGGTCGCCAGCGTCAGGGTGCCTTGCTGCACCAGCCGCAGGATGGTCGATCCGGTGACCCATTTGGTGGC…
>T08_2_trimmed_(paired)_contig_87300_trimmed	Taihu 2014	1.01e-22	28.5	45.79	ACTTCTGTACCCTTTTGCCGAGCCATTTTTTGAAACAACTTCCACTCCCCCCAAATAGTTAATCATCCAGCCTGGAGAGCCAGGAAGGTTCGGTTGGGTAGGCTCCAACATCTGGCGGTAACTGGCAGGACTGAGGAGTTTATTCTTGCGGATGGCATTGTAGAATTTGAGCAGGTCACCAAGAGTTGACTGCATGAATCCTGAAGGGATGTTGTAAAGTCCGCCAGGTGGCATTACTTGGTCAACGGGCAGTAATTGCCCATTTCTATCAGCATTTATGTATCCAGTCGCTGTATTGGCATCTCTAAGTCCAAATCCTGTGCGGGTCATACCCAGCGGCAAGAATATTTTTTGCCGCATGAAATCTAGGTAGGGTTGTCCGCTCACAATTTCGATAAC…
>T08_5_trimmed_(paired)_contig_18801_trimmed	Taihu 2014	1.65e-12	30.95	51.19	AAACTGGGGTATGCCGCTCTGATGAGACATGAACTGCCGAATGGTAGTTTTCCGCCAGCTTGGTGGCAGATTCGGGATGTATTGACTGGCGACATCATCAAGTCTTAGCTTCCCCTGATCGACGAGATACATGATGCCGAAAGCTGTGAGAGGTTTTGAAACTGAACCGATATTAAAAATAGTGTTTTCATTAGGGATCATCCCTGAATCAAGAGATATTACCCCGCAACCTTTTTCAACGACAATTTTTCCATTTTTAACGACCCCCAGAACAAGTCCAGGAATCTTGTTTTTCTGCATGAAGTCATTGACGATGGCATCCGCTTTTTG
>T08_8_trimmed_(paired)_contig_32533_trimmed	Taihu 2014	6.17e-23	29.1	46.56	GGCATTGTAGAATTTGAGCAGGTCACCAAGAGTTGACTGCATGAATCCTGAAGGGATGTTGTAAAGTCCGCCAGGTGGCATTACTTGGTCAACGGGCAGTAATTGCCCATTTCTATCAGCATTTATGTATCCAGTCGCTGTATTGGCATCTCTAAGTCCAAATCCTGTGCGGGTCATACCCAGCGGCAAGAATATTTTTTGCCGCATGAAATCTAGGTAGGGTTGTCCGCTCACAATTTCGATAACTTTTCCGATCACCACATAATTAAAGTTGTTATATTCATTTCTCGTCCCCGGTGCAAAGGTTAAAGGAAGATTGTTGGAGCTGGCGAGCATCTCGTTAAATGTTGGCAGATTACGCTTAAACTGGGGTATGCCGCTCTGATGAGACATGAACTG…
>T08_8_trimmed_(paired)_contig_61791_trimmed	Taihu 2014	6.03e-09	31.76	43.24	GCCGAGCGGCACGCGCAGTGCGGCGTCGAAGATCTGCTGCCAGGACTTTCCTGTTGCCACCTCCGCCATGCGACCGGCCACGCGCAGATGGGTGGCGCCGTACCAGTAACGCGCCTTCGGCGGCGCCAGCACACCCGGTTTGCTCTGGCTGTCATGAATCCGCAGCACCGCCTCGGCCAGCGTGATGCTGGTCGCGGTGGCTTCGTCCACGTCGCCCTCCAGGCCGCTGGTGAACGACAGCAGGTCAGAAAGCGTGATTTGGCCTATCGGCCCGCTCCACGGTGCGCCGTTGCGGTCGACCAGCAGATCGCCCGTGCGGGTCGCCAGCGTCAGGGTGCCTTGCTGCACCAGCCGCAGGATGGTCGATCCGGTGACCCATTTGGTGGCCGAGGCGATGGG…
>T08_9_trimmed_(paired)_contig_163664_trimmed	Taihu 2014	3.14e-08	31.07	49.51	GCCCCGATATTTCAGATCGTCCGCACTAAAGAACTCGTAGCACAAGCCAGAGGTATGTAGCAGCAGATCATTGACGGTGATTTTGCGCTTTGGCGCCCGTGTCTTAGGTTGGCCAGATGCGTCAAAGCCATCCAGCACCTGTAGTTCATCAATCTCTGGCACGTATTTGCCAGCCGGATCGTCGAGGCTTAATTTCCCTTCTTCGATCAGCTGCATCGCTACCACCCCGGTCATTGCCTTCGTGGTAGAAAAAATTGCTAATACAGAATCGGTGGTCATCGGCGCGTCTTTACCCAGTTCGCGCACTCC
>T08_9_trimmed_(paired)_contig_290451_trimmed	Taihu 2014	4.23e-06	29.46	44.64	TACGTACCGGAGTTGGCCGCATCGGCCTTTGGCAACGCCACCGTACGGCAGCTGATGGACATGACCACCGGCATCCGTTTCAGCGAAGACTACGCCGACCCCAAGGCCGAGGTCTGGGCGCACGCTGCAGCCGGCAACCCGCTACCCAAACCGGCGGACTATAGCGGGCCGCGCAGTTACTACGAATTTCTGACGACCGTACAGCCGGAAGGGCAACACGGCGAGGCCTTCCACTACCGCACCGCCAATACCGACGCGCTGGGCTGGGTGCTGGCCCGTGTCAGCGGCCGCAACGTGGCCGACTTGCTGTCCGAACGCATCTGGCGGCGGCTGGGTGCCGAGCAA
>T08_9_trimmed_(paired)_contig_472550_trimmed	Taihu 2014	2.25e-06	24.21	47.73	GACGCTCTTCCGATCTCTGCGAAAGGACGGCAGAAACTTCGACACCGGATCGGTCAGTTGCACCTTGCCGTCTTCGACCAGCATCATCAGCGCCGTCGAGACGATGGGCTTGGTCATGGAGTACAGACGGAAGATGGAGTCGGTCTGCATGGCGGTGCCGGCCTGGTTGTTCAGGCTGCCAAAGGCTTCCGAGTAGACCAGCTTGCCCTTGCGAGCGACCATCACCACGGCACCGGGCAGCTTCTTGTCCGCCACTTCCTGCTGCATCACCGCCGTGATTTTCTTGAGCCGCTCGGAGGACATACCCACCGACTCCGGATTGGCGCGGGGCAGGGCCTGAGCCAT
>T09_4_trimmed_(paired)_contig_34190_trimmed	Taihu 2014	5.19e-07	26.67	47.79	TCCTCGCCAGACTCCCATCTGTCTGATAAATTCACCATACAACGCCCAATTCCTAGCAGTTAGTTGCGCCCCATGAGCCATAAATGAATGACCATCAGCAGCTTTTCTCCAACCTCCTATTTTAATACCAATAGGGCTTAAAATTCGACGCTTGAGGTAAGAAACCGGGTCTTCCCCCTTCAGTTTTCGCAACATCACTGCTCCAAATATTTGGAATGGTACTTGTCCGTAAGCAAATTTAGTACCTGGTTCATCTAATACAGGCATGGCTATAGACTGCTGATAACTAATGTTAATAGAGGCGCGGTTCCCTGCTGCTTTAGGAGTCTGAATGCCGCTCGTTAGGTTGAGCAATTGTCTGATAGTTACCTTTTCTTTGATCCGATTACCTTGCCATTC…
>T09_5I_trimmed_(paired)_contig_61546_trimmed	Taihu 2014	1.63e-11	29.13	47	GGCATTGTAGAATTTGAGCAGGTCACCAAGAGTTGACTGCATGAATCCTGAAGGGATGTTGTAAAGTCCGCCAGGTGGCATTACTTGGTCAACGGGCAGTAATTGCCCATTTCTATCAGCATTTATGTATCCAGTCGCTGTATTGGCATCTCTAAGTCCAAATCCTGTGCGGGTCATACCCAGCGGCAAGAATATTTTTTGCCGCATGAAATCTAGGTAGGGTTGTCCGCTCACAATTTCGATAACTTTTCCGATCACCACATAATTAAAGTTGTTATATTCATTTCTCGTCCCCGGTGCAAAGGTTAAAGGAAGATTGTTGGAGCTGGCGAGCATCTCGTTAAATGTTGGCAGATTACGCTTAAACTGGGGTATGCCGCTCTGATGAGACATGAACTG…
>T10_1_trimmed_(paired)_contig_47879_trimmed	Taihu 2014	5.19e-07	26.67	47.79	TCCTCGCCAGACTCCCATCTGTCTGATAAATTCACCATACAACGCCCAATTCCTAGCAGTTAGTTGCGCCCCATGAGCCATAAATGAATGACCATCAGCAGCTTTTCTCCAACCTCCTATTTTAATACCAATAGGGCTTAAAATTCGACGCTTGAGGTAAGAAACCGGGTCTTCCCCCTTCAGTTTTCGCAACATCACTGCTCCAAATATTTGGAATGGTACTTGTCCGTAAGCAAATTTAGTACCTGGTTCATCTAATACAGGCATGGCTATAGACTGCTGATAACTAATGTTAATAGAGGCGCGGTTCCCTGCTGCTTTAGGAGTCTGAATGCCGCTCGTTAGGTTGAGCAATTGTCTGATAGTTACCTTTTCTTTGATCCGATTACCTTGCCATTC…
>T10_2_trimmed_(paired)_contig_33309_trimmed	Taihu 2014	5.19e-07	26.67	47.79	TCCTCGCCAGACTCCCATCTGTCTGATAAATTCACCATACAACGCCCAATTCCTAGCAGTTAGTTGCGCCCCATGAGCCATAAATGAATGACCATCAGCAGCTTTTCTCCAACCTCCTATTTTAATACCAATAGGGCTTAAAATTCGACGCTTGAGGTAAGAAACCGGGTCTTCCCCCTTCAGTTTTCGCAACATCACTGCTCCAAATATTTGGAATGGTACTTGTCCGTAAGCAAATTTAGTACCTGGTTCATCTAATACAGGCATGGCTATAGACTGCTGATAACTAATGTTAATAGAGGCGCGGTTCCCTGCTGCTTTAGGAGTCTGAATGCCGCTCGTTAGGTTGAGCAATTGTCTGATAGTTACCTTTTCTTTGATCCGATTACCTTGCCATTC…
>T10_2_trimmed_(paired)_contig_75023_trimmed	Taihu 2014	7.48e-13	31.03	45.4	GAGTCGCTGGACGCCAATTACACCGACGGCATCGTCGTGCTGCACCGGGGCCGCATCGTCTACGAGCGCTACTTCGGCGTGCTCAAGCGAGAAGGCCAGCACGGCGCCATGTCGGTGACCAAGACCTTCATCGGCACGCTCGCCGCGCTGCTGGCGGCCGAGGGCCGGCTCGACTCCGCCCGGCGCGTGGACCACTACGTGCCGGAGCTGGCCGCATCGGCCTTCGGCAGCGCCACGGTGCGGCAGGTCATGGACATGACCACGGGCATCCGGTTCAGCGAGGACTACGCCGACCCCAACGCCGAGGTGTGGGCCCATGCCGCCGCCGGCAACCCGCTGCCCAAGGCCAGGGACTACACCGGCCCGCGCACGTACTTCGAGTTCCTGCAGACCGTGAAG…
>T10_4_trimmed_(paired)_contig_164296_trimmed	Taihu 2014	1.86e-08	28.57	38.96	ACGCGCAATCCCATCGCCTCGGCCACCAAATGGGTCACCGGATCGACCATCCTGCGGCTGGTGCAGCAAGGCACCCTGACGCTGGCGACCCGCACGGGCGATCTGCTGGTCGACCGCAAGGGCGCACCGTGGAGCGGGCCGATAGGCCAAATCACGCTTTCTGACCTGCTGTCGTTCACCAGCGGCCTGGAGGGCGACGTGGACGAAGCCACCGCGACCAGCAGCACGCTGGCCGAGGCGGTGCTGCGGATTCATGACAGCCAGAGCAAACCGGGTGTGCTGGCGCCGCCGAAGGCGCGTTACTGGTACGGCGCCACCCATCTGCGCGTGGCCGGTCGCATGGCGGAGGTGGCAACAGGAAAGTCCTGGCAGCAGATCTTCGACGCCGCACTGCGCGTG…
>T10_6_trimmed_(paired)_contig_10785_trimmed	Taihu 2014	2.35e-14	28.87	46.37	GTCCCGCATATCGAGCGGCTCGAACAGGTACTTCTTCATTACGGCACCCAGACGCTCGCCACGAATTTTTTCGACGATACGACCGAGCCAGTCTATGTTGACTCCATAGGTCCACGCTGCACCCGGATCATGCAGCAGCACAGTACGAACCGAATCGAATGTGCTGGAAACGATGGTCGGAATGTTTTTGGCGCTACGATACTTCAGATCGTCCGCGCTAAAGAACTCGTAGCACAAGCCTGAGGTATGCAGCAGTAGATCATTGACGGTGATTTTGCGCTTTGGCGCCCGTGTCTTAGGTTGGCCAGATGCGTCAAAGCCATCCAGCACCTGTAGTTCATCAATCTCTGGCACGTATTTGCCAGCCGGATCGTCGAGGCTTAATTTCCCTTCTTCGAT…
>T10_6_trimmed_(paired)_contig_22983_trimmed	Taihu 2014	2.08e-23	26.39	43.4	CAAAAAGCGGATGCCATCGTCAATGACTTCATGCAGAAAAACAAGATTCCTGGACTTGTTCTGGGGGTCGTTAAAAATGGAAAAATTGTCGTTGAAAAAGGTTGCGGGGTAATATCTCTTGATTCAGGGATGATCCCTAATGAAAACACTATTTTTAATATCGGTTCAGTTTCAAAACCTCTCACAGCTTTCGGCATCATGTATCTCGTCGATCAGGGGAAGCTAAGACTTGATGATGTCGCCAGTCAATACATCCCGAATCTGCCACCAAGCTGGCGGAAAACTACCATTCGGCAGTTCATGTCTCATCAGAGCGGCATACCCCAGTTTAAGCGTAATCTGCCAACATTTAACGAGATGCTCGCCAGCTCCAACAATCTTCCTTTAACCTTTGCACCG…
>T10_7I_trimmed_(paired)_contig_104520_trimmed	Taihu 2014				GGCGCCTGGCCCCGCCCGGTGCGCAAAGTCCACGGCCACCGGGTCCCAGATCATGGCCAAGGCAAGTCCATCGGCTCCACTGGCAATCAGCTCGCGCAGGATGAAGGTCGAGTCGCCCGCCGCCCCGCCACCCGGGTTGTCGCTGCGGTCTGCAATCACCGATGCTTTGCCCCTTTCCGCAGCCAACCGGAGCGCGGTTTGCACTGCCACGCGGGCCGAAAGACCCTCCGATGCCGGCACTGCGGCTTGTGCAAAGCGAGTGGCGAAGTCCAACGCCAGTGCCTGCGCAGCGGCAGGGTCTCCATCCGTTGTCACCAGGACCGTGGCGCCCGCGTCCGGCACGTCGGAGAGCCAGAAGCCATGGCAGGTCGACAAGGACAGCACGCCGGAGCGCTTGTG…
>T10_7I_trimmed_(paired)_contig_111916_trimmed	Taihu 2014	2.21e-07	29.6	44	CTCGACTCCGCCCGGCACGTAGTGGTCCACGCGCCGGAGCTGGCCGCATCGGCCTTCGGCAGCGCCACGGTGCGGCAGGTCATGGACATGACCACGGGCATCCGGTTCAGCGAGGACTACGCCGACCCCAACGCCGAGGTGTGGGCCCATGCCGCCGCCGGCAACCCGCTGCCCAAGGCCAGGGACTACACCGGCCCGCGCACGTACTTCGAGTTCCTGCAGACCGTGAAGCCCGAGGGGGCGCACGGCGAGGCGTTTCACTACCGCACCGCCAACACCGACGTGCTGGGCTGGGTGCTGGCGCGGGTGACGGGTAAGTCGGTGGCCCAGTTGCTGTCCGAGCGCATCTGGATCCCGATGGGC
>T10_7I_trimmed_(paired)_contig_116738_trimmed	Taihu 2014	1.24e-09	29.6	44.8	ATGGCGCCCGACACCAAGATGCGCGTGGCGTCGGTCTCCAAGCTCGCCACCGCAGCGGCGGTGATGCGGCTGGTGGAACAGGGCAGGCTCAGCCTCGACGCCGACGTGTCGGGGCCGCTGGGCTTCCCGCTGCGCAACCCGGCCCACCCGGATGCGCCCATCACGCTGCGCCATCTCTTGAGCCACACTTCCTCGATGCGCGACGCCGACATCTACTGGGGCGGCGTGGGCGGGCGGCTGGCCGATTTCTTCACGCCGGGCCACGAGAAGTTCTGCGATGGGGCACGTTTCGCCCCGCAGGCGCCGGGCGCCTATTTCGCCTATTGCAACATGGCCTTCGGCGTCATGGGGACGCTG
>T10_7I_trimmed_(paired)_contig_123523_trimmed	Taihu 2014	1.46e-06	29.93	40.88	ACCGGATCGACCATCCTGCGGCTGGTGCAGCAAGGCACCCTGACGCTGGCGACCCGCACGGGCGATCTGCTGGTCGACCGCAACGGCGCACCGTGGACCGGGCCGATAGGCCAAATCACGCTTTCTGACCTGCTGTCGTTCACCAGCGGCCTGGAGGGCGACGTGGACGAAGCCACCGCGACCAGCATCACGCTGGCCGAGGCGGTGCTGCGGATTCATGACAGCCAGAGCAAACCGGGTGTGCTGGCGCCGCCGAAGGCGCGTTACTGGTACGGCGCCACCCATCTGCGCGTGGCCGGTCGCATGGCGGAGGTGGCAACAGGAAAGTCCTGGCAGCAGATCTTCGACGCCGCACTGCGCGTGCCGCTCGGCTGGGATTCCACC
>T10_7I_trimmed_(paired)_contig_131877_trimmed	Taihu 2014	5.57e-08	31.65	44.6	CATGCCCAGCGGGGCCAGGATACGCTCGCGGGTGATGGCTTCCCAACTGGAGCCGGCCGCAACCCCCATCGCATGGCCGGCCAGGATGTACATGATGTTGGTGTAGAGATGCCGCATGCGCGGCGGCGCCGCGATCGGAAGATAAGGCAGCCGCTGGAGCAGGCCTTCCGGCGTCAGATCTGGATTGTTGTACCAGAGCAGGTCATGGCGCGGCAGGCCGGTACGGTGGCAGAGCATGTCGCGCAGGCTGATGCCGGCGTATTCCGCCCCGCCTGCCATCGCAAAAGCCGGCAACAGCGCGCGCACTGGCGCATCGAGGTCCAGCGCGCCGTCCTGGGCAAGGATTGCTGCGCCAGCCGCGGTGAAGGCCTTGGTGGTGGACGCCGTGCCGAACAGCGT
>T10_7I_trimmed_(paired)_contig_76312_trimmed	Taihu 2014	1.67e-25	35.44	48.15	CGTGCGGGCCATGCCGGCCGGGCCAAATTGGCGCTGCTGGAAGAAGGCCGGGAAACCGCCGCCGGTCTGGGCGGCGATGATGCGGCCGAGCAGGGCATAGTTGGTCTGGTTATAGGCAAAGCGGGGGCCAACCGCGGCCTCTGGCGGTTTGGCCATCACCAGCCGCCACGCCTGGGCCTCGCTGGCGGCGATCACCCAGTCGCCATCGATGATGTCGGGCAGGCCGGATTGGTGGGAGAGCAGCTGGTGCAGCGGGATCGTGGCCCAGGCCGGCGGCAGATCGGGCAGGTAGCGGCCGATGGGCGCGTCGAGATCAAGCCGGCCGGCCTCCACCAGCTGCATCACCGCAACGCCGGTGAAGCTCTTGGTTGCCGAATTGATCGAGAAGCGGGTTTCCGG…
>T10_7I_trimmed_(paired)_contig_77145_trimmed	Taihu 2014	6.94e-14	33.06	45.76	CCACTTCTGCAGATCGGCGAGCGTGGTGTAGATGCCGCCGGCGCCCATGCTGCCGCCCAAATCACCCAGGTCGCGCCAGACGCCGTTCGCGTTGCGCGAGTAGCCGACGGTGGCGCCCTTCACGGGCACGCGCACGGCGGCGCGTACGCGCGAGCTGGTCATGCCGATGGGCGCGAACACGCGCTGCGCCATGAACTCCTCGAACGGCAGTCCACTCGCACGGGCCACGATCATGGCCGCGAGGCCGAACGCCGTGTTGTTGTAAGTGAACTCGGCGCCGGGGGCGTTCTGCAGCACGGGCTGGCGGTTGATCAGCGGGATGAACTCCTCGCGCCCCACGTAGTCGGCCTCGTCGATGCGGCG
>T10_7I_trimmed_(paired)_contig_87259_trimmed	Taihu 2014	4.53e-26	37.42	55.83	TCGATGGGCAAGCAGTTCACCAGTGCCGGCATCATGGCGTTGGTGGAGGATGGCCGTCTCGATCTCGAGGCGTCGGTGCGCCGCTATCTGCCCGACACGCCGGACAGCTGGCAGCCCATACGCCTGCGCCACCTGCTGAACCACAGCGCGGGGCTGCCCGACTACACCGCCGACGGCTTCGACTACCGCCGCGACTACACCGACGACGACCTGCTGCGCATGGCGGCCGCGCTGCCGGTGGAGTTCGCACCCGGCACGCGCTGGAACTACTCCAACACCGGATACGTGGTGCTGGGCATCATCATCACGCGCGTGACCGGCATGCCGTATCACGAGTTCCTGCGGCAGCGGCTGTTCACGCCGGCGGGCATGCCGACCATTCGCGTGATCACCGAAAGC…

## Sheet: mlrC contigs
Query	Study site and year	Lowest E-value	Greatest identity %	Greatest positive %	Nucleotide sequences (trimmed)
>Diel1s_2200h_metaT_9422.1.132642.GTGGCC.anqtp.hR_trimmed_contig_508960_trimmed	Lake Erie 2014 Diel	3.68e-25	44.76	63.81	ACGTTTACTCGCCGGATCGAGTCCCACCGCTGAAAAACAATCCGGCGAAAAACCCTGCGTGCGGTAGTCGTTGATGATGATGTCCACCGCCTCCTCGCCCCCGGTCGAGGCAACACGCAACCAAGCCATCCGCCCGAGTGGTGCAACTGCGACACCAAACCGTTGGTGTTTGCCCTCCACTTGGCCTTTAACAACCACACGCAAATCAAGCGGTGTGCCCGAGGCGGGGCCGAGTTTGCCGCCGAGACGCATGTCGAGTGTCGCGCCGACTCCTGCACCAAAGGCGATGTCGGTTGCAATCGGATCCCAAAACGG
>Diel1s_2200h_metaT_9422.1.132642.GTGGCC.anqtp.hR_trimmed_contig_98163_trimmed	Lake Erie 2014 Diel	5.93e-37	40	62.24	GATGTAGAGCACCTTCTTGGCGATCGGCCCGTAGGCGGCCATGAAGTGGTTGGTGGACTTCACCACCACCAGCTTCTTCTGCGTCGGCTCGATGCCCACGTTACGGAACAGCTCCAGCCCCAGCGCCTGGTTGCGCTTGGTCTCCAGCACCACCTCCACGCCGCCGATGCGGATCGCCGCGCAGTCGCCCAGCTCCGCCTAGGCGGGGCCAAAGGACTGGAAGCAGTCGCGCTTCAGGCCGATTACGGTGACCGCCGCATCCACCGGCGTATTGCTGGTGGGGCCGATCTTGCCGCCGAAGCGCAGGTTGAAGGTGGTGCCCAGCCCGGCATCAAAGCACAGCCGCACCGCGATCGGGTCCCAGATCGGGCCGAGGCAGGCATCCTGCACGTCGCGCTC…
>Diel4S_1600h_metaT_9422.1.132642.GTTTCG.anqtp.hR_trimmed_contig_179206_trimmed	Lake Erie 2014 Diel	4.33e-54	45.97	61.29	GGCAACACGCAACCAAGCCATCCGCCCGAGTGGTGCAACTGCGTCACCAAACCGTTGGTGTTTGCCCTCCACTAGGCCTTTAACAACCACACGCAAATCAAGCGGTGTGCCCGAGGCGGGGCCGAGTTTGCCGCCGAGACGCATGTCGAGTGTCGCGCCGACTCCTGCACCAAAGGCGATGTCGGTTGCAATCGGATCCCAAAACGGTGAGACGGCAAAACCGCCACCCGTAAGTTCGAGGAACCTGCGGATCAGAAACGTCGCGTCGCCGCCAGCACCAATACCAGGATTGTCCGCCGTATCGGCGAGCACGAGTGGCATGGTTCCGTTGTGCGCCAGAACACGTGTTGCGGCCTCGTCAATGGACAAGAAGCGTGGAGTAATCTCATTACGCAGCGA…
>Diel4S_1600h_metaT_9422.1.132642.GTTTCG.anqtp.hR_trimmed_contig_305872_trimmed	Lake Erie 2014 Diel	1.14e-13	32.99	53.61	AAGGTCGGACCGTGTTCAGGTGACCCTTTGGACGTCGAGGCCGAAGTGGTCGTCGTGCGCGAAGACGCTCGCCAAGCAGCCTTCGCTCAAGGCGAACCCAGGCTGTGGCTCGGGCGCACAGCCCGGCTTCGGATCGGTGGCATCGATGTAGTGGTCAACACGGAGCGGCAACAGGTCTTCGATCCCCGCGTGTTCACCGAGCACGGCATCGACCCTTCCTCGTGTCGTGTGATGGTGGTCAAGTCGACGACGCACTTTCGCAACGGCTTCGAGCCGCTGGCCGGCTCGATCGTGGACTGCGAGACGCCGGGAAGCGTGACGACAGACCCCACGTTGCTAACCTACCGCCGCCTGCCCAGGCCGATCTTTCCCATCGACCCT
>Diel5S_2200h_metaT_9422.2.132645.CGTACG.anqtp.hR_trimmed_contig_332597_trimmed	Lake Erie 2014 Diel	5.93e-14	31.07	54.37	GCACATGGGCAGCTGCAGCAGCTTCATGGCCGGTCGGACGCCGGTTTTCAGGGTATGCAGCAGGCAGCGTCCGGCTTCCAGTCCGCGGTCCAGCTGATCGAGGTGTGGATTGGTGCGATAGCCGAAGAGTGCGTCGCAGTTTTCGGCCATCTGTGTCGAGACATTGGCATGCAGGTCCAGTGTGCCGATGATGGGCAAATCCGGTCCGACGTGCTGCCGGACCAGCTGCAGCCAGTGGCCATCTGCGTCGGCTGCATTTTCGGCGACGGTGGCACCATGCGGTGCGACGAGCAGTCCATCGAGTGGTCCGGCCTGCTGCAGGCTGCTGATGAGCAGCTGCATCAGCTGTGTCCAGCAGTCGTGTGTGATGGTGCCGTAGGGCATGGCGCGGGC
>HAA9FADXX_s1_1_GSLv3-7_10_SL75768_(paired)_contig_90524_Average_coverage:_3.10_trimmed	Lake Erie 2014	2.21e-16	34.75	51.69	GTGGTTGGTGACGGCGACGACGGCGCAGCCCATTTCGGCGATGTCGAGCCAGGGTTGGACAGGGAAGAGGGAGACGGCTTCGGCCTGGCCGGAGGCTTCGAGGGCCTGGGCGGCGGTGATGAGTTCGTGCATGGGGCCGCGGTAGGTCTGCGAGTTTTCGGCTTGGATGATGAGGGGCAGTTTGTGATAGGCCATGGTGGGGCGCACTTCGCCCGCGAGGGTACGGAGGAGGAGGCGGGCGGCTTTCTGGCCGGTTTCGAACATGTCGACGTGGGGGTAGGTGTGGTAGCCGACGATGGCGGTGGCAAGGGTGACCATGCGTTGGGTGATGTTGGCGTGGAGGTCGAG
>T10_2_trimmed_(paired)_contig_84340_trimmed	Lake Taihu 2014	6.58e-14	37.4	51.56	ATCGTCGGTGCGTACCCGACCACGCTGGAGCCGATGCGCTCGTACGTCGACCGCGAGCGCGAGGCGCACAAGCGCTCCGGCGTGCTGTCCTTGTCGACCTGCCATGGCTTCTGGCTCTCCGACGTGCCGGACGCGGGCGCCACGGTCCTGGTGACAACGGATGGAGACCCCGCCGCTGCGCAGGCACTGGCGTTGGACTTCGCCACTCGCTTTGCACAAGCCGCAGTGCCGGCATCGGAGGGTCTTTCGGCCCGCGTAGCAGTGCAAACCGCGCTCCGGTTGGCTGCGGAAAGGGGCAAAGCATCGGTGATTGCAGACCGCAGCGACAACCCGGGTGGCGGGGCGGCGGGCGACTCGACCTTCATCCTGCGCGAGCTGATTGCCAGTGGA
>T10_4_trimmed_(paired)_contig_11719_trimmed	Lake Taihu 2014	1.66e-11	38.94	52.21	AATCAGCTCGCGCAGGATGAAGGTCGAGTCGCCCGCCGCCCCGCCACCCGGGTTGTCGCTGCGGTCTGCAATCACCGATGCTTTGCCCCTTTCCGCAGCCAACCGGAGCGCGGTTTGCACTGCCACGCGGGCCGAAAGACCCTCCGATGCCGGCACTGCGGCTTGTGCAAAGCGAGTGGCGAAGTCCAACGCCAGTGCCTGCGCAGCGGCGGGGTCTCCATCCGTTGTCACCAGGACCGTGGCGCCCGCGTCCGGCACGTCGGAGAGCCAGAAGCCATGGCAGGTCGACAAGGACAGCACGCCGGAGCGCTTGTGCGCCTCGCGCTCGCGGTCGACGTACGAGCGCAT
>T10_7I_trimmed_(paired)_contig_45543_trimmed	Lake Taihu 2014	1.48e-13	38.74	49.55	TTCATCGCCGCCCTGATGCACGAGACCAATGCCTTCTCGCCGGTGCCGACCAACCTTGCCAGCTTCGACGTCTGGCGGCCCGCGGGCAGTGTGGAGCCCCCGTCCGAGCGCGACACGCTGGCCTATGGCGCATTCTGGCGACGAGCGATCGACGAAGGCCTTGCCGTGGCGCCGAGCTACTTCGCAACCTGCCAACCCAGCGCACCGCTATCGGCCGCCGACTGGGCGGCCATGCGGGATGAACTGCTGACCGACCTGGCGGGCGCTGGCGCCATCGACCGGGTCTTCCTGTTCCTGCATGGTGCGCAATGCGCG
